# Supplementary material for: Quality of life of elderly patients with solid tumours undergoing adjuvant cancer therapy: a systematic review
Source: PubMed Central journal article supplement — BMJ Open. 2018 Jan 24;8(1):e018101. doi: 10.1136/bmjopen-2017-018101 (PMC5786145; doi:10.1136/bmjopen-2017-018101), 2018-01-24
Supplement: bmjopen-2017-018101.draft_revisions.pdf [file bmjopen-2017-018101.draft_revisions.pdf]

# BMJ Open

BMJ Open is committed to open peer review. As part of this commitment we make the peer review history of every article we publish publicly available.

When an article is published we post the peer reviewers' comments and the authors' responses online. We also post the versions of the paper that were used during peer review. These are the versions that the peer review comments apply to.

The versions of the paper that follow are the versions that were submitted during the peer review process. They are not the versions of record or the final published versions. They should not be cited or distributed as the published version of this manuscript.

BMJ Open is an open access journal and the full, final, typeset and author-corrected version of record of the manuscript is available on our site with no access controls, subscription charges or pay-per-view fees (<http://bmjopen.bmj.com>).

If you have any questions on BMJ Open's open peer review process please email [editorial.bmjopen@bmj.com](mailto:editorial.bmjopen@bmj.com)

# BMJ Open

## Quality of life of elderly patients with solid tumours receiving adjuvant cancer therapy: a systematic review

|                                 |                                                                                                                                                                                                                                            |
|---------------------------------|--------------------------------------------------------------------------------------------------------------------------------------------------------------------------------------------------------------------------------------------|
| Journal:                        | <i>BMJ Open</i>                                                                                                                                                                                                                            |
| Manuscript ID                   | bmjopen-2017-018101                                                                                                                                                                                                                        |
| Article Type:                   | Research                                                                                                                                                                                                                                   |
| Date Submitted by the Author:   | 07-Jun-2017                                                                                                                                                                                                                                |
| Complete List of Authors:       | Cheng, Karis, Kin-Fong; National University of Singapore;<br>Lim, Ethel, Yee-Ting; National University of Singapore<br>Teo, Desrene, Rui-Ling; National University of Singapore<br>Kanesvaran, Ravindran; National Cancer Centre Singapore |
| <b>Primary Subject Heading</b>: | Oncology                                                                                                                                                                                                                                   |
| Secondary Subject Heading:      | Geriatric medicine                                                                                                                                                                                                                         |
| Keywords:                       | Elderly cancer patients, quality of life, CHEMOTHERAPY, RADIOTHERAPY, solid tumours, ONCOLOGY                                                                                                                                              |
|                                 |                                                                                                                                                                                                                                            |

SCHOLARONE™  
Manuscripts

Peer Review Only

1  
2  
3  
4  
5  
6  
7  
8  
9  
10 **Quality of life of elderly patients with solid tumours receiving adjuvant cancer therapy:**  
11 **a systematic review**  
12  
13

14  
15  
16 CHENG Karis, Kin-fong<sup>1</sup>; LIM Ethel Yee Ting<sup>1</sup>; TEO Desrene Rui Ling<sup>1</sup>; KANESVARAN  
17 Ravindran<sup>2</sup>  
18

19  
20 <sup>1</sup>Alice Lee Centre for Nursing Studies, Yong Loo Lin School of Medicine,  
21 MD11, 10 Medical Drive, National University of Singapore, National University Health  
22 System, Singapore 117597

23 <sup>2</sup>National Cancer Centre Singapore, 11 Hospital Drive, Singapore 169610  
24  
25  
26  
27  
28  
29  
30

31 Corresponding author:

32 CHENG Karis, Kin-fong

33 RN, PGDip Epidemiol & Biostat, PhD

34 Level 2, Block MD11, 10 Medical Drive, National University of Singapore, Singapore 117597

35 DID: (65) 6516 3117, Fax: (65) 6776 7135, E-mail: [nurckfk@nus.edu.sg](mailto:nurckfk@nus.edu.sg) or

36 [karis\\_cheng@nuhs.edu.sg](mailto:karis_cheng@nuhs.edu.sg)  
37  
38  
39  
40  
41  
42  
43  
44  
45  
46  
47  
48  
49  
50  
51  
52  
53  
54  
55  
56  
57  
58  
59  
60

## Abstract

### Objectives

The measurement of quality of life (QoL) in elderly cancer population is increasingly being recognized as an important part of clinical decision-making and the evaluation of treatment outcome. This systematic review aimed to examine the literature on QoL among elderly cancer patients receiving adjuvant therapy.

### Methods

A systematic search was conducted of studies published from inception to December 2016 through major databases. Eligible studies included patients aged  $\geq 65$  years old and had solid tumours treated with adjuvant chemotherapy and/or radiotherapy, and QoL was reported as an outcome of the study.

### Results

Eighteen studies of moderate-to-high methodological quality evaluating 1,779 patients were identified. Of these 1,779 patients, 1,639 completed the baseline QoL questionnaire and with at least one QoL measurement during and/or following adjuvant therapy were included for data synthesis. Meta-analyses on elderly breast cancer patients treated with standard chemotherapy regimen revealed statistically significant declination of QoL as measured by EORTC QLQ-C30 during (mean difference 8.15, 95% CI 1.65 to 14.65, 721 participants) and at the completion of chemotherapy (mean difference 9.31, 95% CI 1.56 to 17.07, 720 participants). For the studies that did not permit meta-analysis, narrative analysis indicated stable or improved QoL over the course of adjuvant therapy and at follow-up evaluations. Elderly patients with glioblastoma had a significant declination of QoL as measured by EORTC QLQ-C30 at completion of radiotherapy (mean difference 5.70, 95% CI 2.47 to 8.93,

1  
2  
3 142 participants). Narrative analysis on QoL in elderly patients with colon, prostate, lung, or  
4  
5 cervical cancer revealed a uniformly stable or improved QoL over the course of adjuvant  
6  
7 therapy and at follow-up evaluations across the studies.  
8  
9

## 10 11 12 **Conclusions**

13  
14 This review suggests that adjuvant chemotherapy and radiotherapy have no longitudinal  
15  
16 detrimental impact on QoL in elderly cancer population. Larger studies in different elderly  
17  
18 cancer settings are warranted to validate the results.  
19  
20

## 21 22 23 24 25 **Strengths and limitations of this study**

- 26  
27 • This study involved in synthesis of the evidence of global or overall quality of life  
28  
29 (QoL) during and following adjuvant chemotherapy and/or radiotherapy in  
30  
31 comparison with the baseline in elderly cancer population.  
32
- 33  
34 • The studies included in this systematic review were of moderate-to-high quality as  
35  
36 assessed by Mols et al's quality rating criteria.  
37
- 38  
39 • Due to heterogeneity and lack of availability of data, meta-analysis was not performed  
40  
41 in all of the included studies.  
42  
43  
44

## 45 46 **Keywords**

47  
48 Elderly cancer patients, quality of life, chemotherapy, radiotherapy, solid tumours, oncology  
49  
50  
51  
52  
53  
54  
55  
56  
57  
58  
59  
60

## Introduction

Many countries in the world have an increasing incidence of cancer among older people. This can be attributed to the remarkable growth of the elderly demographic and the common pathophysiology of cancer and aging.<sup>1-2</sup> The demands for and importance of broadening clinical trials to include older adults along with incorporating geriatric-specific endpoints,<sup>3</sup> and integrating geriatric assessment to address the needs of individuals are growing.<sup>4</sup> Although quality of life (QoL) is not formally part of the geriatric assessment, the measurement of QoL in the elderly cancer population is increasingly being recognized as an important patient-reported outcome to complement the clinician's evaluation of disease progression, and the determination of the clinical benefit and burden of cancer treatment, along with toxicity, survival and mortality rates. QoL is also considered as a useful outcome measure to enhance patient-clinician communication and patient compliance in elderly patients with breast cancer during cancer treatment.<sup>5</sup> In a short literature review, Wedding et al (2007) indicated that elderly cancer patients tend to perceive their QoL as more important than gain in survival when compared to younger patients.<sup>6</sup> Nevertheless, our understanding of the impact of cancer treatment on QoL in elderly patients is still very limited at present. Clinically, the decisions regarding cancer therapy and clinical management of elderly cancer patients may be complicated by their vulnerability to chemo-toxicity and the pathological changes of aging together with different considerations of treatment benefit and harm margins, functional decline, tolerability and QoL issues. Extermann et al (2015) revealed an association of QoL impact with dose modification of chemotherapy in older patients in a univariate analysis.<sup>7</sup> The literature indicated that elderly cancer patients are less likely than their younger counterparts to be treated with a full course of adjuvant chemotherapy and radiotherapy.<sup>8</sup> Consideration should be given to approaches that could prolong life expectancy but not at the expense of QoL and physical and psychological functioning. For

1  
2  
3 cancers with an extremely poor prognosis, such as glioblastoma, extension of survival is less  
4 clinically meaningful if the patient has a decline in QoL.<sup>9</sup> It has also been suggested that QoL  
5 should be the main endpoint to support clinical decision-making if different cancer treatments  
6 have been shown to be equally effective in terms of survival.<sup>10</sup> To our knowledge, a  
7 systematic review of the impact of adjuvant therapy on QoL in elderly cancer patients has not  
8 yet been published. This systematic review therefore aimed to examine the available evidence  
9 in the literature on global or overall QoL and other domains pertaining to QoL during and  
10 following adjuvant therapy in elderly cancer patients, and, where possible, to pool data for  
11 meta-analysis. The review question was “Does global or overall QoL during and following  
12 adjuvant chemotherapy and/or radiotherapy decline or improve in comparison with the  
13 baseline in elderly patients with solid tumours?”  
14  
15  
16  
17  
18  
19  
20  
21  
22  
23  
24  
25  
26  
27  
28  
29

## 30 **Methods**

### 31 Literature search and study selection

32 A systematic electronic search of peer-reviewed English-language articles published in  
33 CINAHL, CENTRAL, PubMed, PsycINFO, and Web of Science from inception to December  
34 2016 was conducted. A pilot search on CINAHL to identify relevant keywords contained in  
35 the title, abstract, and subject descriptors was performed. Three broad categories of concepts  
36 were searched: “elderly”, “cancer” and “quality of life”. The search terms included: (older\*  
37 OR elder\* OR geriatric OR gerontology\* OR senior OR aged) AND (oncology OR cancer\*  
38 OR neoplasm\*) AND (quality of life OR QOL). The reference lists of included articles were  
39 also examined to identify additional eligible articles.  
40  
41  
42  
43  
44  
45  
46  
47  
48  
49  
50  
51  
52  
53

54 Clinical trials or observational studies including elderly patients (aged 65 years old or above)  
55 with solid tumour who were receiving adjuvant chemotherapy and/or radiotherapy and  
56  
57  
58  
59  
60

1  
2  
3 prospectively collecting QoL data were eligible. We required that baseline and at least one  
4  
5 global or overall QoL data during and/or following adjuvant chemotherapy and/or  
6  
7 radiotherapy were collected in the studies so as to allow for comparison before and after  
8  
9 adjuvant therapy. Studies that covered heterogeneous age groups were included where  
10  
11 subgroup analysis was provided for those aged 65 years old or above. Studies were excluded  
12  
13 if they involved patients with haematological malignancy, distant metastatic cancer or  
14  
15 recurrent cancer without separate analysis and report of solid tumour or non-  
16  
17 metastatic/regional metastatic cancer, and if they evaluated surgical or procedure-related  
18  
19 treatment. Studies presented in abstract form, case reports, qualitative studies, and literature  
20  
21 review articles were also excluded. Two review authors (LEYT and TDRL) independently  
22  
23 performed searching and eligibility assessments. Discrepancies and disagreements in study  
24  
25 selection were resolved by consensus.  
26  
27  
28  
29  
30  
31

### 32 Data extraction and quality assessment

33  
34 Review authors (LEYT and TDRL) also independently reviewed and extracted the data from  
35  
36 each included study, and the first author (CKKF) performed double-checking. Publication  
37  
38 information, sample characteristics, functional status and co-morbidities at baseline (if  
39  
40 specified), type of cancer, type of adjuvant chemotherapy and/or radiotherapy, therapy-  
41  
42 related adverse effects (if specified), and QoL measurements and results were extracted.  
43  
44 Functional status and co-morbidities at baseline, and therapy-related adverse effects (if  
45  
46 specified) were also extracted due to concern that they might co-vary with cancer therapy to  
47  
48 alter the change of QoL.  
49  
50  
51  
52  
53

54 The potential bias and quality of the included studies were assessed by the same review  
55  
56 authors independently using criteria for assessing the methodological quality of studies of  
57  
58  
59  
60



1  
2  
3 QoL.<sup>11-12</sup> These criteria include 14 items assessing the methodological aspects of QoL studies;  
4  
5 sampling (two items), selection of QoL measurement (one item), data collection process (two  
6  
7 items), response rate (two items), group comparison (one item), clarity of reporting (five  
8  
9 items), and determination of prognostic factors (one item). For each item, a score of 1 or 0  
10  
11 was made; 1 was assigned for an item meeting the criteria, while 0 was assigned if an item  
12  
13 neither met the criteria nor described sufficiently. The possible score ranged from 0 – 14,  
14  
15 with  $\geq 10$ , 7 – 9, and  $\leq 6$  indicating high, moderate, and low quality, respectively.  
16  
17  
18  
19

20  
21 Any persistent discrepancies and disagreements that arose during study selection, data  
22  
23 extraction, and quality assessment were reviewed by the first author (CKKF).  
24  
25  
26

### 27 Data synthesis

28  
29 The mean difference in QoL score from baseline to follow-up measurement during and/or  
30  
31 following adjuvant chemotherapy and/or radiotherapy with a 95% confidence interval for  
32  
33 each study was computed and pooled for meta-analysis using RevMan5.3 software if  
34  
35 sufficient information was available (e.g., mean, standard deviation, and sample size of the  
36  
37 study). Given that the included studies was heterogeneous in cancer populations, the mean  
38  
39 difference of individual studies based on cancer site and adjuvant therapy was pooled for  
40  
41 meta-analyses when QoL was measured with the same scale. Heterogeneity between studies  
42  
43 was assessed using the  $\text{Chi}^2$  test and  $I^2$  statistic. Fixed effects model was used when  $I^2$  value  
44  
45  $\leq 50\%$ , while Random effects model was used when  $I^2$  value  $> 50\%$ . Where meta-analysis was  
46  
47 deemed impossible, we summarized the results in a narrative format.  
48  
49  
50  
51  
52  
53  
54  
55  
56  
57  
58  
59  
60

## Results

### Search results and study characteristics

The initial search identified 56,935 articles, of which 440 were considered potentially relevant after checking for duplicates, title and abstract screening. Of 440 articles for full-text assessment, 18 met the eligibility criteria for inclusion into the review and analysis (Figure 1).<sup>13-30</sup> In most cases, articles were excluded due to the absence of QoL assessment during cancer treatment, age-stratified analysis, and separate reports of QoL for patients receiving adjuvant therapy and for patients with non-metastatic cancer.

The scores of the methodological quality evaluation of the included studies are shown in Table 1. The mean quality score was  $9.8 \pm 1.2$  (range 7 – 12); ten studies attained scores  $\geq 10$  (high quality)<sup>13,14,17,20,21,22,24,27,29,30</sup> and eight scored 7 – 9 (moderate quality).<sup>15,16,18,19,23,25,26,28</sup>

Items where neither met the criteria nor described sufficiently were sampling (44.4%), clarity of reporting (77.8%), and determination of prognostic factors (100%).

INSERT TABLE 1 HERE

Eleven studies were published between 2000 to 2009, and seven in 2010 to 2015. With respect to country of origin, ten were from Europe, four from the USA, two from South Korea, one from Canada, and one was multi-countries. As for study design, 13 studies were prospective observational studies assessing QoL in patients receiving adjuvant chemotherapy,<sup>14,16,17,19,21,27,28,30</sup> radiotherapy,<sup>13,29</sup> or concomitant chemotherapy and radiotherapy.<sup>23-25</sup> Four were RCTs;<sup>15,18,20,22</sup> of which two compared different chemotherapy regimens on QoL, one study compared chemotherapy and hormonal therapy against hormonal alone on QoL, and another one compared radiotherapy and supportive care with

1  
2  
3 supportive care alone on QoL. One was validation study which involved QoL evaluation for  
4 patients undergoing radiotherapy with or without hormonal therapy.<sup>26</sup>  
5  
6  
7

8  
9  
10 Sample size was reported by 17 of the 18 studies.<sup>13-28,30</sup> Caffo 2003 did not separately report  
11 the number of patients by aged  $\geq 65$  years.<sup>29</sup> The sample size of each study varied from 11 to  
12 368.<sup>13-28,30</sup> In all, these 17 studies included 1,779 patients.<sup>13-28,30</sup> Of these 1,779 patients, 1639  
13 completed the baseline QoL questionnaire. The baseline completion rate was 69.5 – 100%  
14 across studies. Where reported, the age range of the patients was 65 – 92 years across studies,  
15 and the mean age range was 67 – 83 years.<sup>13,14,16,17,19,21-25,28-30</sup> Eleven studies included  
16 patients aged  $\geq 80$  years.<sup>13,17,19,21,22,24,25,27-30</sup> As for cancer diagnosis, eight studies included  
17 patients with breast cancer,<sup>13-20</sup> four studies were glioblastoma,<sup>21-24</sup> and two studies were  
18 colon cancer.<sup>27-28</sup> Mixed,<sup>25</sup> prostate,<sup>26</sup> cervical,<sup>29</sup> and lung cancer<sup>30</sup> each were included in one  
19 study.  
20  
21  
22  
23  
24  
25  
26  
27  
28  
29  
30  
31  
32  
33

34 The most frequently used QoL instrument was European Organization for Research and  
35 Treatment of Cancer general questionnaire (EORTC QLQ-C30) (14 studies).<sup>13,14,18-24,26-30</sup>  
36 Perceived Adjustment to Chronic Illness Scale (PACIS),<sup>15</sup> Breast Cancer Chemotherapy  
37 Questionnaire (BCQ),<sup>16</sup> Functional Assessment of Cancer Therapy-Breast Cancer (FACT-  
38 B),<sup>17</sup> and M.D. Anderson Symptom Inventory<sup>25</sup> each were used in one study. Nine studies  
39 also used a disease-specific QoL instrument together with EORTC QLQ-C30 for  
40 breast,<sup>13,14,18-20</sup> brain,<sup>21,22,24</sup> and lung<sup>30</sup> cancer populations.  
41  
42  
43  
44  
45  
46  
47  
48  
49  
50

51  
52 The follow-up QoL evaluation reported at various intervals during adjuvant therapy and at  
53 post-treatment period. Ten studies reported at least one QoL evaluation during adjuvant  
54 therapy,<sup>14-16,18-22,28,29</sup> while five evaluated QoL immediately after completion of adjuvant  
55  
56  
57  
58  
59  
60

1  
2  
3 therapy.<sup>17-19,25,26</sup> Length of QoL evaluation following adjuvant therapy ranged from one  
4  
5 month post-treatment to 24 months after the 1<sup>st</sup> day of adjuvant therapy. Ten studies followed  
6  
7 patients for  $\leq 6$  months after the completion of adjuvant therapy.<sup>13,14,16,17,19,22,26-28,30</sup> Two  
8  
9 studies had QoL evaluation of 24 months after the 1<sup>st</sup> day of chemotherapy.<sup>15,18</sup>  
10

11  
12  
13 Geriatric domains of functional status and/or co-morbidities at the baseline were examined  
14  
15 and reported in 13 studies.<sup>13-15,17,18,20-24,26,28,30</sup> As shown in Table 2, two studies reported the  
16  
17 mean of the Karnofsky Performance Scale (KPS) as  $\geq 90$ ,<sup>13,26</sup> while three reported the median  
18  
19 of the KPS as  $\geq 70$  at the baseline.<sup>22-24</sup> KPS  $< 70$  was used as a cut-off for recruitment  
20  
21 criterion in one study.<sup>21</sup> Co-morbid conditions were reported in seven studies;<sup>13,14,17,18,20,28,30</sup>  
22  
23 five of these involved patients with limiting co-morbidity or with  $\geq 3$  co-  
24  
25 morbidities.<sup>13,14,18,28,30</sup> Twelve studies measured cancer therapy-related toxicity during  
26  
27 adjuvant therapy,<sup>13,15-18,20-23,28-30</sup> and nine of these used NCI CTCAE.<sup>13,17,18,20,21,22,23,28,30</sup> For  
28  
29 haematological toxicity, two studies reported  $< 10\%$  grade 3 – 4 toxicity,<sup>15,28</sup> and four  
30  
31 reported  $\geq 25\%$  during adjuvant chemotherapy or concomitant radiotherapy and  
32  
33 chemotherapy.<sup>7,21,23,30</sup> For non-haematological toxicity, a study reported  $< 10\%$  grade 3 – 4  
34  
35 toxicity,<sup>15</sup> and three reported  $\geq 25\%$  during adjuvant chemotherapy or concomitant  
36  
37 radiotherapy and chemotherapy.<sup>17,23,28</sup>  
38  
39  
40  
41  
42  
43  
44

45  
46  
47  
48  
49  
50  
51  
52  
53  
54  
55  
56  
57  
58  
59  
60  
INSERT TABLE 2 HERE

#### QoL of elderly patients with breast cancer

##### *EORTC QLQ-C30*

Three studies measured global or overall QoL using EORTC QLQ-C30 at baseline, in the  
midst of chemotherapy, at immediately completion of chemotherapy, and at 4 – 12 months

1  
2  
3 after completion of chemotherapy in elderly patients with breast cancer.<sup>14,18,19</sup> Patients in  
4  
5 these studies were treated with the standard chemotherapy regimen for breast cancer,  
6  
7 including anthracycline-based, cyclophosphamide/ methotrexate/ flurouracil (CMF) or  
8  
9 flurouracil/ epirubicin/ cyclophosphamide (FEC) regimen. In the study of Kornblith et al,<sup>18</sup>  
10  
11 about half of the patients received capecitabine. The mean difference in global or overall QoL  
12  
13 score from baseline to follow-up measurements of these three studies could be included in the  
14  
15 meta-analysis.<sup>14,18,19</sup> Since the study by Kornblith et al<sup>18</sup> involved comparison of standard  
16  
17 chemotherapy and capecitabine, separate QoL scores were used in meta-analysis. As showed  
18  
19 in Figures 2a and b, the pooled mean difference in global or overall QoL score from baseline  
20  
21 to the midst of chemotherapy was 8.15 (95% CI 1.65 to 14.65, 721 participants,  $I^2 = 78\%$ )  
22  
23 and from baseline to immediately completion of chemotherapy was 9.31 (95% CI 1.56 to  
24  
25 17.07, 720 participants,  $I^2 = 84\%$ ), indicating there were significant reductions of global or  
26  
27 overall QoL in the midst and at immediately completion of chemotherapy. Major contributor  
28  
29 to the high level of heterogeneity ( $I^2$  of 78% and 84%) could be the study of Kornblith et al,<sup>18</sup>  
30  
31 which showed small mean difference in the midst and at the completion of capecitabine in  
32  
33 compared with those studies involved standard chemotherapy regimen for breast cancer.  
34  
35 Nevertheless, the sensitivity analysis by repeating the meta-analysis with the exclusion of  
36  
37 Kornblith et al's capecitabine group<sup>18</sup> showed similar results about the declination of QoL  
38  
39 during and at the completion of chemotherapy. On the other hand, the pooled mean difference  
40  
41 in global or overall QoL score from baseline to 4 – 12 months after completion of  
42  
43 chemotherapy was -1.33 (95% CI -4.10 to 1.44, 694 participants,  $I^2 = 20\%$ ), indicating no  
44  
45 significant change in QoL at 4 – 12 months after chemotherapy (Figure 2c). Chemotherapy-  
46  
47 induced toxicity was not reported in Browall et al and Watters et al's studies.<sup>14,19</sup> Kornblith et  
48  
49 al revealed a significantly fewer adverse effects in patients treated with capecitabine than  
50  
51 standard regimen during and at the completion of chemotherapy.<sup>18</sup>  
52  
53  
54  
55  
56  
57  
58  
59  
60

1  
2  
3  
4  
5  
6  
7  
8  
9  
10  
11  
12  
13  
14  
15  
16  
17  
18  
19  
20  
21  
22  
23  
24  
25  
26  
27  
28  
29  
30  
31  
32  
33  
34  
35  
36  
37  
38  
39  
40  
41  
42  
43  
44  
45  
46  
47  
48  
49  
50  
51  
52  
53  
54  
55  
56  
57  
58  
59  
60

INSERT FIGURES 2A-C HERE

Browall et al and Watters et al also reported domain scores and were included in the meta-analysis.<sup>14,19</sup> The pooled mean differences in role and social functioning scores of the EORTC QLQ-C30 from baseline to at completion of chemotherapy were statistically significant, with mean differences of 18.63 (95% CI 9.54 to 27.72, 105 participants,  $I^2 = 0\%$ ) and 12.37 (95% CI 4.20 to 20.55, 105 participants,  $I^2 = 0\%$ ), respectively, indicating there were significant reductions of role and social well-being at the completion of chemotherapy (Figures 3a-b). No significant reductions in role and social functioning scores in the midst and at 4 – 12 months after completion of chemotherapy was found. Only the emotion domain was showed improvement from baseline through follow-up evaluations, with a statistically significantly higher score in the midst of chemotherapy in comparison with the baseline (mean difference -8.79, 95% CI -15.71 to -1.88, 108 participants,  $I^2 = 19\%$ ) (Figure 3c). The domains of physical and cognitive functioning revealed no significant differences from baseline through follow-up evaluations.

INSERT FIGURES 3A-C HERE

The study of Perrone et al used the EORTC QLQ-C30 but provided insufficient data for inclusion in meta-analysis, thus the results of this study is described narratively.<sup>20</sup> On global and domain scores, Perrone et al found no differences from baseline through follow-up measurements of patients treated with CMF or docetaxel.<sup>20</sup> It is of note that 79% and 47% of patients suffered from >grade 2 haematological and non-haematological toxicities, respectively.<sup>20</sup> Arraras et al measured QoL using the EORTC QLQ-C30 in elderly breast

1  
2  
3 cancer patients treated with radiotherapy.<sup>13</sup> Although this study at baseline started off with a  
4  
5 lower level of QoL (score of 59.5), the global or overall QoL scores continually increased  
6  
7 significantly from baseline through immediately and 6 weeks after completion of  
8  
9 radiotherapy. Severe radiotherapy-induced toxicity did not report in this study.<sup>13</sup>  
10  
11

#### 12 13 14 *Other QoL measures*

15  
16 The study of Dees et al measured QoL using the BCQ and found a non-significant declination  
17  
18 of global or overall QoL score from baseline to last dose of chemotherapy.<sup>16</sup> Patients in this  
19  
20 study was treated with doxorubicin/ cyclophosphamide (AC) regimen, and clinically  
21  
22 significant age-related trends in toxicity was not reported.<sup>16</sup> The study of Hurria et al found  
23  
24 no significant difference in global or overall as well as physical, social, and emotional well-  
25  
26 being from baseline through immediately and 6 months after completion of chemotherapy.<sup>17</sup>  
27  
28 Patients in this study were treated with the anthracycline-based, taxane-based, or CMF  
29  
30 regimen. It is of note that 27% and 31% of patients suffered from grade 3 – 4 haematological  
31  
32 and non-haematological toxicities, respectively.<sup>17</sup> Only the study of Crivellari et al measured  
33  
34 QoL using the PACIS and found a statistically significantly improvement in global or overall  
35  
36 QoL score from baseline to 18 months of follow-up of chemotherapy.<sup>15</sup> It is of note that  
37  
38 patients in this study were treated with CMF regimen and had a low QoL score of 59 at  
39  
40 baseline. Less than 10% of patients manifested grade 3 toxicity.<sup>15</sup>  
41  
42  
43  
44  
45  
46

#### 47 QoL of elderly patients with glioblastoma

48  
49 The EORTC QLQ-C30 was used in three studies for elderly patients with glioblastoma  
50  
51 treated with radiotherapy<sup>22</sup> or concomitant radiotherapy and chemotherapy.<sup>23,24</sup> Because  
52  
53 Minniti et al did not report standard deviations,<sup>24</sup> only the studies of Keime-Gulbert et al and  
54  
55 Minniti et al were included in the meta-analysis.<sup>22,23</sup> As shown in Figure 4, the pooled mean  
56  
57  
58  
59  
60

1  
2  
3 difference in global or overall QoL score from baseline to completion of radiotherapy of 5.70  
4  
5 was statistically significant (95% CI 2.47 to 8.93, 142 participants,  $I^2 = 83\%$ ), indicating there  
6  
7 was significantly lower global or overall QoL at completion of radiotherapy.<sup>22,23</sup> Keime-  
8  
9 Gulbert et al and Minniti et al also reported statistically significantly lower scores in physical,  
10  
11 cognitive and social domains, and physical, role and social domains, respectively, during and  
12  
13 after radiotherapy in compared with baseline scores.<sup>22,23</sup> Of note, in the study of Minniti et  
14  
15 al,<sup>23</sup> patients at baseline started off with a lower level of QoL (score of 58.3), and 28% of  
16  
17 them developed grade 3 – 4 haematological toxicity during chemotherapy. Conversely,  
18  
19 severe radiotherapy-induced adverse effects was not reported in Keime-Gulbert et al's  
20  
21 study.<sup>22</sup> The result of the study of Minniti et al is described narratively.<sup>24</sup> On global or overall  
22  
23 and social and cognitive domain scores, Minniti et al found statistically significant  
24  
25 improvements from baseline to six months from the start of radiotherapy.<sup>24</sup>  
26  
27  
28  
29  
30  
31

32 INSERT FIGURE 4 HERE  
33  
34  
35

36 Gallego et al measured QoL using the EORTC QLQ-C30 in elderly patients with  
37  
38 glioblastoma treated with temozolomide, and reported statistically significantly  
39  
40 improvements in global or overall QoL and physical, role, cognitive and social domains  
41  
42 scores over time.<sup>21</sup> Of note, 25% of patients manifested grade 3 – 4 haematological toxicity in  
43  
44 Gallego et al's study.<sup>21</sup>  
45  
46  
47  
48

#### 49 QoL of elderly patients with colon cancer

50 Two studies measured global or overall QoL using EORTC QLQ-C30 at baseline, in the  
51  
52 midst of chemotherapy, and after chemotherapy in elderly patients with colon cancer.<sup>27,28</sup>  
53  
54 However, they provided insufficient data for meta-analysis, thus the results of this study is  
55  
56  
57  
58  
59  
60



1  
2  
3 described narratively. In the study of Bouvier et al,<sup>27</sup> patients were treated with flurouracil/  
4 oxaliplatin/ capecitabine regimen. This study showed a trend for an increase of global or  
5 overall QoL score over time, however, no information about the p-value. The study of Chang  
6 et al found no significant worsening of global or overall and functional QoL during  
7 capecitabine.<sup>28</sup>  
8  
9  
10  
11  
12

#### 13 14 15 16 QoL of elderly patients with prostate cancer

17 The study of Arraras et al measured QoL using the EORTC QLQ-C30.<sup>26</sup> There was no  
18 difference in global or overall QoL score from baseline to the last dose of radiotherapy, while  
19 a statistically significantly higher QoL score was reported between the last dose and 6 weeks  
20 after radiotherapy.<sup>26</sup>  
21  
22  
23  
24  
25  
26  
27

#### 28 29 QoL of elderly patients with lung cancer

30 A study measured overall or global QoL using EORTC QLQ-C30 at baseline and one month  
31 after completion of cisplatin plus vinorelbine or carboplatin plus paclitaxel in elderly patients  
32 with resectable non-small cell lung carcinoma.<sup>30</sup> In this study, the QoL score of 52 at baseline  
33 was low. No significant deterioration of overall or global QoL between baseline and after  
34 completion of chemotherapy was found. Severe haematological toxicity was manifested by  
35 39% of patients.<sup>30</sup>  
36  
37  
38  
39  
40  
41  
42  
43  
44  
45  
46

#### 47 QoL of elderly patients with other cancers

48 The study of Mohile et al involved different types of cancer, and the QoL was measured  
49 before and after radiotherapy using the M.D. Anderson Symptom Inventory.<sup>25</sup> In this study,  
50 the score of 2.07 on the scale of 10 at baseline was low. A higher global or overall QoL score  
51  
52  
53  
54  
55  
56  
57  
58  
59  
60

1  
2  
3 at the completion of radiotherapy in comparison with the baseline was reported, however, no  
4  
5 information about the p-value.<sup>25</sup>  
6  
7  
8  
9  
10  
11  
12  
13  
14  
15  
16  
17  
18  
19  
20  
21  
22  
23  
24  
25  
26  
27  
28  
29  
30  
31  
32  
33  
34  
35  
36  
37  
38  
39  
40  
41  
42  
43  
44  
45  
46  
47  
48  
49  
50  
51  
52  
53  
54  
55  
56  
57  
58  
59  
60

For peer review only

## Discussion

In the context of cancer, although QoL by its nature is a patient's overall appraisal of the impact associated with the cancer and its treatment, it is a patient-centred, relevant and key clinical parameter to assist and support clinicians in setting goals and mapping avenues for effective cancer treatment regimens beyond extending survival. Although the 18 studies included in this systematic review were somewhat heterogeneous in reporting parameters of QoL and characteristics of study population to permit data pooling for meta-analysis, our results provide some insights that will contribute to a better understanding of the impact of adjuvant chemotherapy and/or radiotherapy on QoL in elderly patients 65 years of age and older. Our current review suggests that elderly cancer patients can tolerate adjuvant therapy without compromising their QoL in the long term. For some elderly patients with breast cancer or glioblastoma, the negative change of global or overall QoL was transient. The role and social domains of QoL was mostly compromised for elderly breast cancer patients at the completion of chemotherapy. Narrative analysis on the impact of adjuvant therapy on global or overall QoL in elderly patients with colon, prostate, lung, or cervical cancer revealed a uniformly stable or improved global or overall QoL over the course of adjuvant therapy and at follow-up evaluations across the studies. However, data pooling and precise estimation could not be achieved because of small numbers of articles reporting QoL in these elderly cancer populations. In general, adjuvant chemotherapy and radiotherapy have no longitudinal detrimental impact on global or overall QoL and other QoL domains in the elderly cancer population. Our results corroborate the findings of a previous thematic review of the literature regarding the impact of local and systematic treatments on QoL in early-stage breast cancer in the elderly which indicated that the negative effects on QoL were often transient, occurring during treatment but resolving upon treatment completion.<sup>5</sup> It was expected that adverse effects, altered functional status, and co-morbidities could co-vary with the impact of cancer

1  
2  
3 therapy on QoL. Nevertheless, it was difficult to discern whether the short period of QoL  
4  
5 impairment, and stable and improved QoL over the course of adjuvant therapy and post-  
6  
7 treatment was due to less treatment toxicities, less morbid conditions, or to other reasons. The  
8  
9 fact that elderly patients' QoL was maintained or elevated over the course of treatment,  
10  
11 despite haematological toxicity across studies,<sup>17,20,21,30</sup> suggests that stable and improved QoL  
12  
13 is unlikely to be attributable to less treatment toxicity. Alternatively, it may be that elderly  
14  
15 cancer patients undergoing adjuvant therapy experience adverse effects but are able to  
16  
17 tolerate them with limited impact on QoL. This may also be due to the tendency of certain  
18  
19 elderly patients to complain less and endure higher morbidity associated with adverse  
20  
21 effects.<sup>5</sup> Stone et al examined the association between global well-being and age profile in  
22  
23 340,847 people, and showed that people over the age of 50 years have increased global well-  
24  
25 being and positive emotion even in the face of a decline in physical health.<sup>31</sup> Another possible  
26  
27 explanation for stable and improved QoL could be the response shift phenomenon, where the  
28  
29 patients shift in how they appreciate their QoL over time as a result of change in their internal  
30  
31 standards of measurement, values, or definition of QoL.<sup>32,33</sup> Nevertheless, for those studies  
32  
33 reporting stable global or overall QoL (i.e. no difference in means) across time, their sample  
34  
35 size was small and might be of insufficient power to detect differences between baseline and  
36  
37 follow-up evaluations.<sup>16,17,27,28,30</sup> It could also be the case that the samples of the included  
38  
39 studies may be subject to selection bias pertaining to underrepresentation of less healthy older  
40  
41 patients and those with limited expectation of treatment benefit in their individual studies.<sup>3</sup>  
42  
43  
44  
45  
46  
47  
48

## 49 **Conclusion**

50  
51 The current review suggests that for some elderly patients with breast cancer or glioblastoma,  
52  
53 the negative change in QoL was short-term during adjuvant therapy. Adjuvant chemotherapy  
54  
55 and radiotherapy had no longitudinal detrimental impact on global or overall QoL and other  
56  
57  
58  
59  
60

1  
2  
3 QoL domains in the elderly cancer population. Older age should therefore not be the reason  
4  
5 to deprive patients of adjuvant chemotherapy and radiotherapy, which they may be able to  
6  
7 tolerate.<sup>18</sup> Efforts should be made to optimise the use of effective cancer treatment in elderly  
8  
9 patients. Nevertheless, our review results should be viewed with caution, due to heterogeneity  
10  
11 in measurement of QoL and lack of availability of data which limit pooling of data for meta-  
12  
13 analysis and impact the robustness of evidence synthesis. An attempt was made to contact the  
14  
15 study authors for data but without success. In addition, small number of articles with respect  
16  
17 to colon, prostate, lung, and cervical cancer makes it impossible for meta-analysis and affects  
18  
19 the interpretation of the review results. Larger studies of elderly patients in different cancer  
20  
21 settings are warranted to validate the present review results, and to further build the evidence  
22  
23 and advance the current knowledge base. These studies should include and stratify elderly  
24  
25 patients by functional status, co-morbid conditions, geriatric syndromes, and prognosis, in  
26  
27 order to be more representative of the real world population and improve the research validity.  
28  
29 Future studies should also include a detailed profile of the cytotoxic effects of chemotherapy  
30  
31 and radiotherapy so as to allow the full exploration of the direct and indirect effects of  
32  
33 adjuvant therapy on QoL.  
34  
35  
36  
37  
38  
39  
40  
41  
42  
43  
44  
45  
46  
47  
48  
49  
50  
51  
52  
53  
54  
55  
56  
57  
58  
59  
60

**Contributors**

CKKF, KR contributed to the conception or design of the work, and analysis and interpretation of data. CKKF is responsible for drafting the manuscript. KR critically reviewed and revised the manuscript for important intellectual content. LEYT and TDRL contributed to the acquisition of data and critical revision of the manuscript for important intellectual content. CKKF, LEYT, TDRL, KR provided final approval of the version to be published.

**Competing interests**

The authors declare that they have no competing interests.

**Data sharing statement**

No additional data are available

## References

1. Yancik R, Ries Lag. Cancer in older persons: an international issue in an aging world. *Semin Oncol* 2004;31:128-36.
2. Finkel T, Serrano M, Blasco M. The common biology of cancer and aging. *Nature* 2007;448:767-74.
3. Hurria A, Levit LA, Dale W, *et al.* Improving the evidence base for treating older adults with cancer: American Society of Clinical Oncology Statement. *J Clin Oncol* 2015; 10.1200/JCO.2015.63.0319
4. International Society of Geriatric Oncology. 2015; <http://www.siog.org/>
5. Reimer T, Gerber B. Quality of life considerations in the treatment of early stage breast cancer in the elderly. *Drugs Aging* 2010;27:791-900.
6. Wedding U, Pientka L, Hoffken K. Quality of life in elderly patients with cancer: a short review. *Eur J Cancer* 2007;43:2203-10.
7. Extermann M, Reich RR, Sehovic M. Chemotoxicity recurrence in older patients: Risk factors and effectiveness of preventive strategies-a prospective study. *Cancer* 2015;121:2984-92.
8. Joerger M, Thürlimann B, Savidan A, *et al.* Treatment of breast cancer in the elderly: a prospective, population-based Swiss study. *J Geriatr Oncol* 2013;4:39-47.
9. Taphoorn MJB, Henriksson R, Bottomley A, *et al.* Health-related quality of life in a randomized phase III study of bevacizumab, temozolomide, and radiotherapy in newly diagnosed glioblastoma. *J Clin Oncol* 2015;33:2166-75.
10. de Haesa JCJM, Curranb D, Aaronsonc NK, *et al.* Quality of life in breast cancer patients aged over 70 years, participating in the EORTC 10850 randomised clinical trial. *Eur J Cancer* 2003;39:945-51.
11. Mols F, Vingerhoets Ad JJM, Coebergh JW, *et al.* Quality of life among long-term breast cancer survivors: a systematic review. *Eur J Cancer* 2005;41:2613-9.
12. Cornish D, Holterhues C, van de Poll\_Franse LV, *et al.* A systematic review of health-related quality of life in cutaneous melanoma. *Ann Oncol* 2009;20:51-8.
13. Arraras JI, Manterola A, Dominguez MA, *et al.* Impact of radiotherapy on the quality of life of elderly patients with localized breast cancer: a prospective study. *Clin Transl Oncol* 2008;10:498-504.
14. Browall MM, Ahlberg KM, Persson LOG, *et al.* The impact of age on Health-Related Quality of Life (HRQoL) and symptoms among postmenopausal women with breast cancer receiving adjuvant chemotherapy. *Acta Oncol* 2008;47:207-15.

15. Crivellari D, Bonetti M, Castiglione-Gertsch M, *et al.* Burdens and benefits of adjuvant cyclophosphamide, methotrexate, and fluorouracil and tamoxifen for elderly patients with breast cancer: the International Breast Cancer Study Group Trial VII. *J Clin Oncol* 2000;18:1412-22.
16. Dees EC, O'Reilly S, Goodman SN, *et al.* A prospective pharmacologic evaluation of age-related toxicity of adjuvant chemotherapy in women with breast cancer. *Cancer Invest* 2000;18:521-9.
17. Hurria A, Hurria A, Zuckerman E, *et al.* A prospective, longitudinal study of the functional status and quality of life of older patients with breast cancer receiving adjuvant chemotherapy. *J Am Geriatr Soc* 2006;54:1119-24.
18. Kornblith AB, Lan L, Archer L, *et al.* Quality of life of older patients with early-stage breast cancer receiving adjuvant chemotherapy: a companion study to cancer and leukemia group B 49907. *J Clin Oncol* 2011;29:1022-8.
19. Watters JM, Yau JC, O'Rourke K, *et al.* Functional status is well maintained in older women during adjuvant chemotherapy for breast cancer. *Ann Oncol* 2003;14:1744-50.
20. Perrone F, Nuzzo F, Di Rella F, *et al.* Weekly docetaxel versus CMF as adjuvant chemotherapy for older women with early breast cancer: final results of the randomized phase II ELDA trial. *Ann Oncol* 2015;26:675-82.
21. Gallego Perez-Larraya J, Ducray F, Chinot O, *et al.* Temozolomide in elderly patients with newly diagnosed glioblastoma and poor performance status: an ANOCEF phase II trial. *J Clin Oncol* 2011;29:3050-5.
22. Keime-Guibert F, Chinot O, Taillandier L, *et al.* Radiotherapy for glioblastoma in the elderly. *N Engl J Med* 2007;356:1527-35.
23. Minniti G, De Sanctis V, Muni R *et al.* Hypofractionated radiotherapy followed by adjuvant chemotherapy with temozolomide in elderly patients with glioblastoma. *J Neurooncol* 2009;91:95-100.
24. Minniti G, Scaringi C, Baldoni A, *et al.* Health-Related quality of life in elderly patients with newly diagnosed glioblastoma treated with short-course radiation therapy plus concomitant and adjuvant temozolomide. *Int J Radiation Oncol Biol Phys* 2013;86: 285-91.
25. Mohile SG, Heckler C, Fan L, *et al.* Age-related differences in symptoms and their interference on quality of life in 903 cancer patients undergoing radiation therapy. *J Geriatr Oncol* 2011;2:225-32.
26. Arraras JI, Villafranca E, de la Vega FA, *et al.* The EORTC quality of life questionnaire QLQ-C30 (version 3.0). Validation study for Spanish prostate cancer patients. *Arch Esp Urol* 2008;61:949-954.
27. Bouvier AM, Jooste V, Bonnetain F, *et al.* Adjuvant treatments do not alter the quality of life in elderly patients with colorectal cancer. *Cancer* 2008;113:879-86.



- 1  
2  
3  
4 28. Chang HJ, Lee KW, Kim JH, *et al.* Adjuvant capecitabine chemotherapy using a  
5 tailored-dose strategy in elderly patients with colon cancer. *Ann Oncol* 2012;23:911-8.  
6  
7  
8 29. Caffo O, Amichetti M, Mussari S, *et al.* Physical side effects and quality of life during  
9 postoperative radiotherapy for uterine cancer. Prospective evaluation by a diary card.  
10 *Gyn Oncol* 2003;88:270-6.  
11  
12 30. Park S, Kim IR, Baek KK, *et al.* Prospective analysis of quality of life in elderly  
13 patients treated with adjuvant chemotherapy for non-small-cell lung cancer. *Ann*  
14 *Oncol* 2013;24:1630-9.  
15  
16 31. Stone AA, Schwartz JE, Broderick JE, *et al.* A snapshot of the age distribution of  
17 psychological well-being in the United States. *PNAS* 2010;107:9985-90.  
18  
19 32. Cemal Y, Jewell S, Albornoz AP, *et al.* Systematic review of quality of life and  
20 patient reported outcomes in patients with oncologic related lower extremity  
21 lymphedema. *Lymphat Res Biol* 2013;11:14-9.  
22  
23 33. Ring L, Hofer S, Heuston F, *et al.* Response shift masks the treatment impact on  
24 patient reported outcomes (PROS): the example of individual quality of life in  
25 edentulous patients. *Health Qual Life Outcomes* 2005;3:55.  
26  
27  
28  
29  
30  
31  
32  
33  
34  
35  
36  
37  
38  
39  
40  
41  
42  
43  
44  
45  
46  
47  
48  
49  
50  
51  
52  
53  
54  
55  
56  
57  
58  
59  
60

Figure 1: PRISMA flow diagram for study selection process

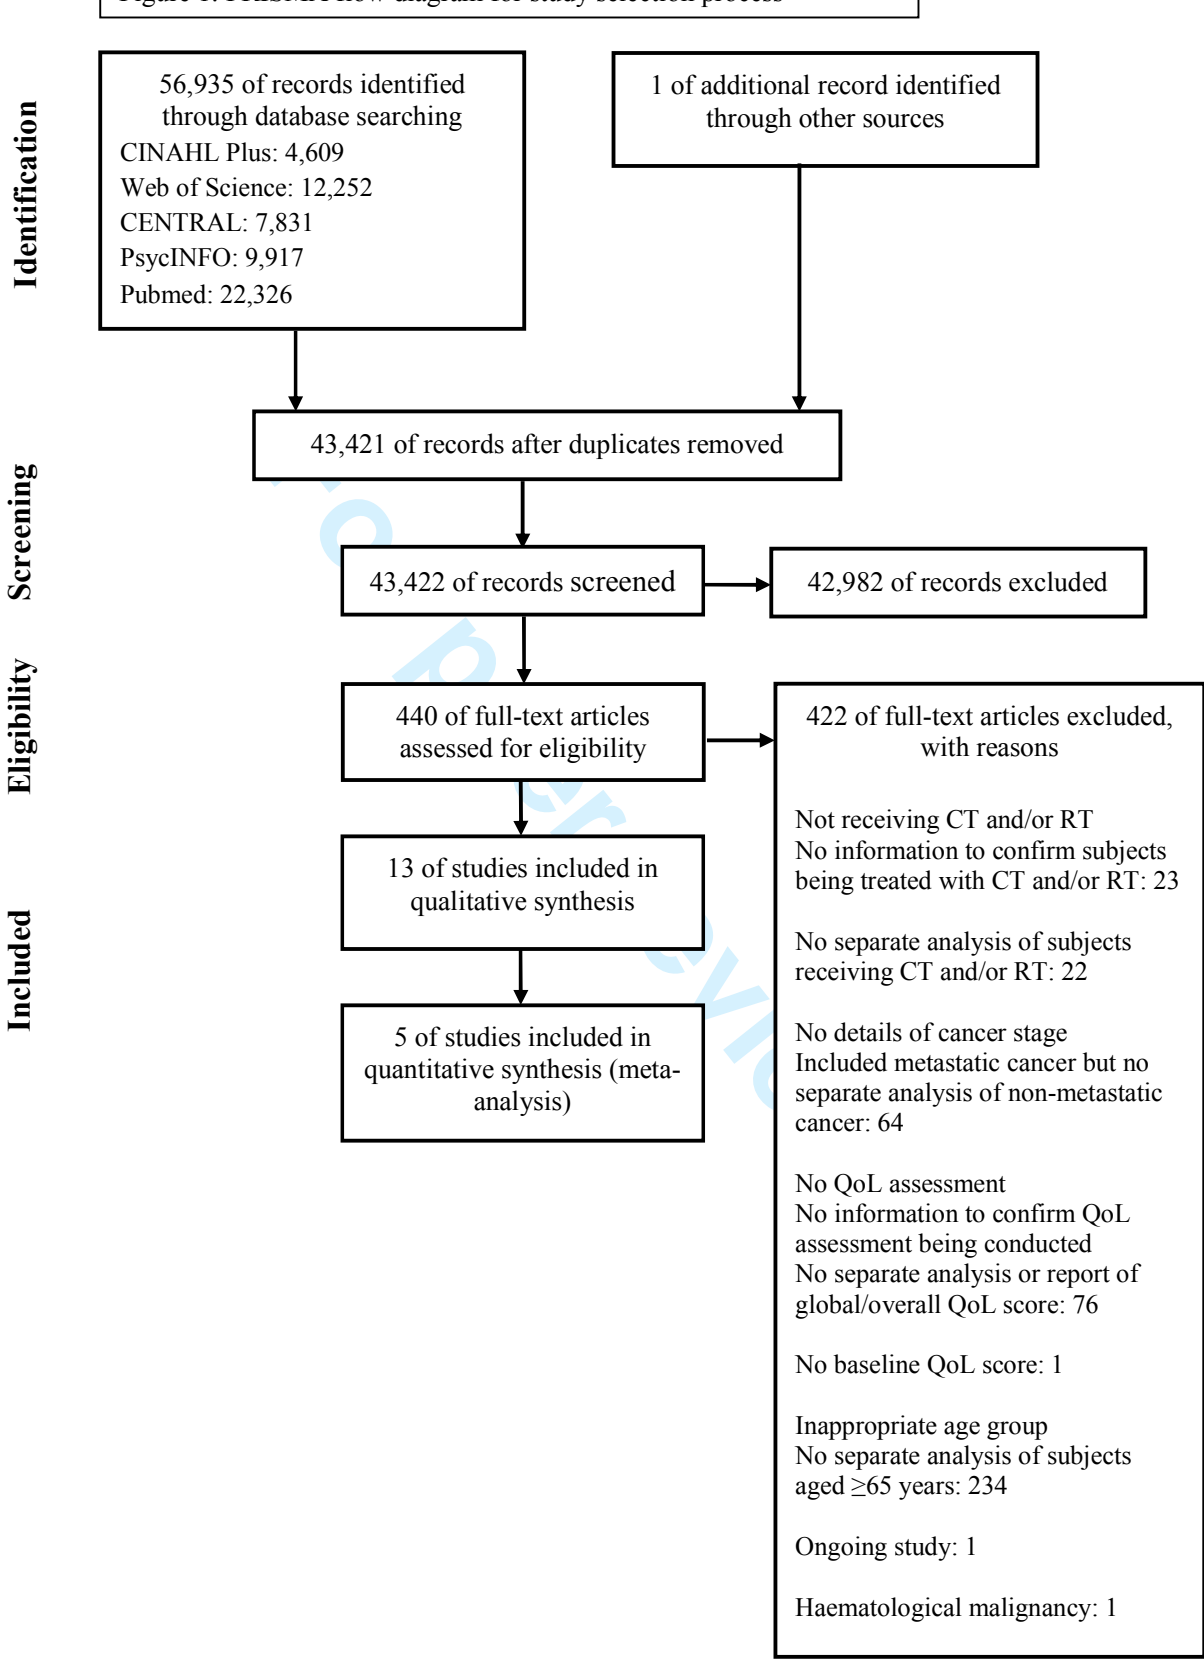

Figure 2a: The pooled MD in global QoL as measured by EORTC QLQ-C30 from baseline to the midst of CT of elderly patients with breast cancer

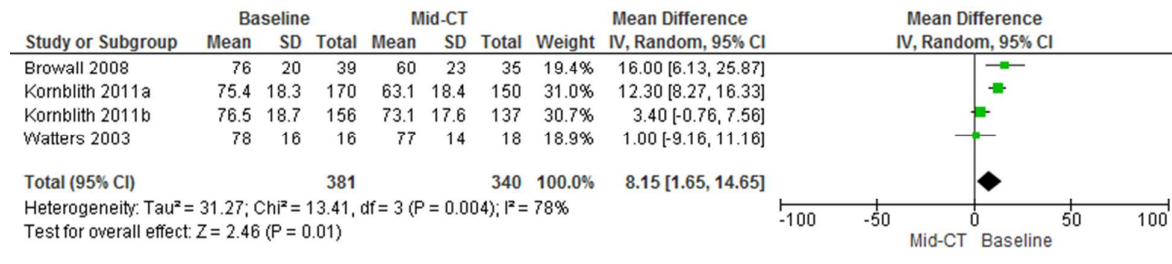

Figure 2b: The pooled MD in global QoL as measured by EORTC QLQ-C30 from baseline to immediately completion of CT of elderly patients with breast cancer

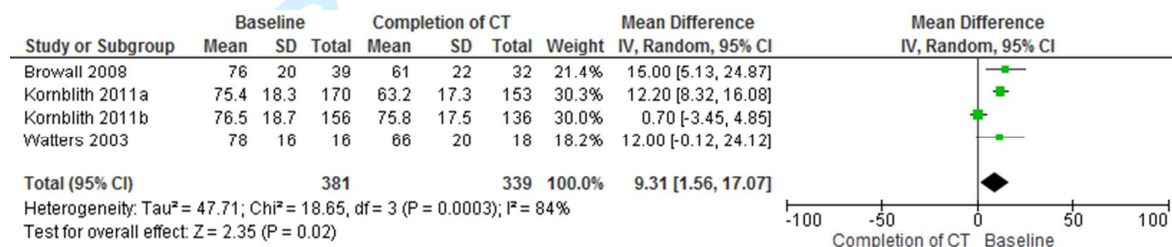

Figure 2c: The pooled MD in global QoL as measured by EORTC QLQ-C30 from baseline to 4-12 months after completion of CT of elderly patients with breast cancer

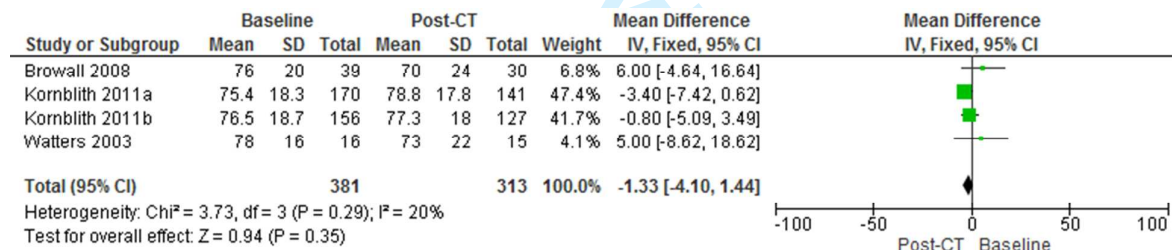

**Figure 3a: The pooled MD in role function domain of QoL as measured by EORTC QLQ-C30 from baseline to immediately completion of CT of elderly patients with breast cancer**

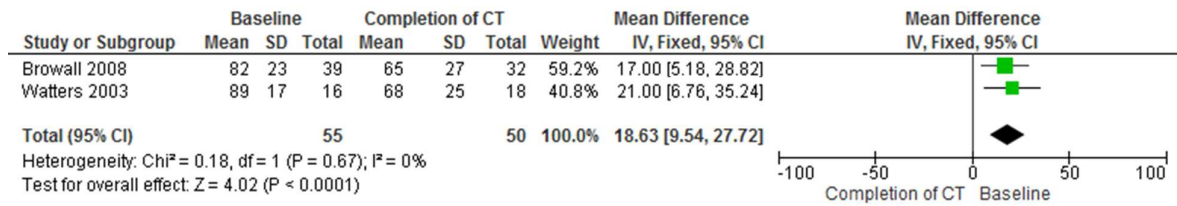

**Figure 3b: The pooled MD in social domain of QoL as measured by EORTC QLQ-C30 from baseline to immediately completion of CT of elderly patients with breast cancer**

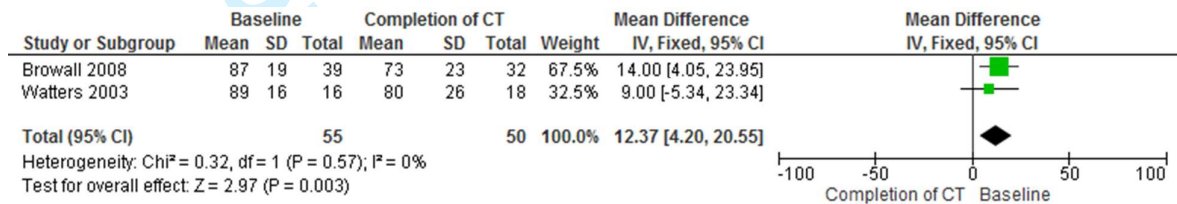

**Figure 3c: The pooled MD in emotion domain of QoL as measured by EORTC QLQ-C30 from baseline to the midst of CT of elderly patients with breast cancer**

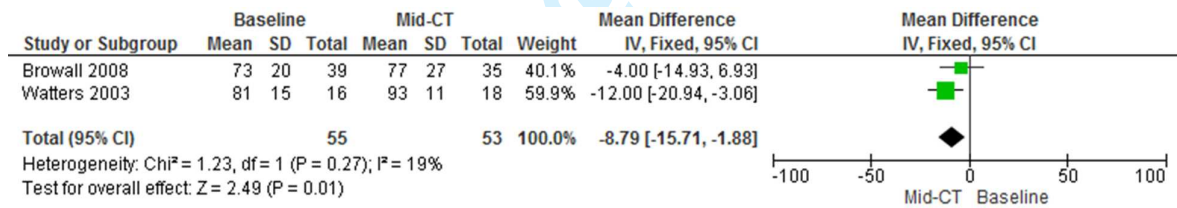

**Figure 4: The pooled MD in global QoL as measured by EORTC QLQ-C30 from baseline to immediately completion of RT of elderly patients with glioblastoma**

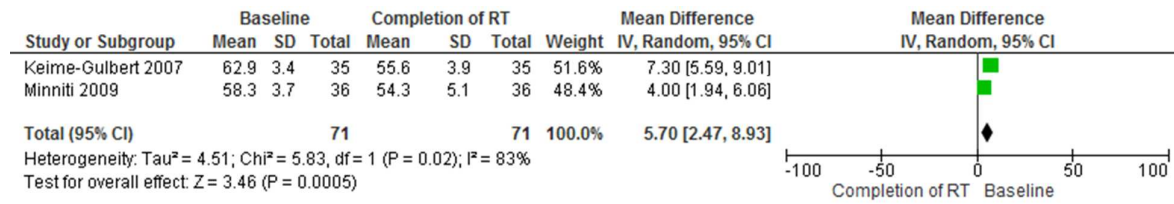

For peer review only

**Table 1. Characteristics of the 18 studies reporting on QoL in elderly patients treated with adjuvant chemotherapy and/or radiotherapy**

| Study / Country                              | Methodological quality | Type of study                          | Age (years)<br>Mean $\pm$ SD                     | Sample size | No. of subjects completed baseline QoL measurement (%) | Gender (% female) | Type of cancer         | CT/RT                                                                                                                                                                                                                                                                                                | QoL instrument (score range)                      | QoL measurement time-point                                                                                                                                                           |
|----------------------------------------------|------------------------|----------------------------------------|--------------------------------------------------|-------------|--------------------------------------------------------|-------------------|------------------------|------------------------------------------------------------------------------------------------------------------------------------------------------------------------------------------------------------------------------------------------------------------------------------------------------|---------------------------------------------------|--------------------------------------------------------------------------------------------------------------------------------------------------------------------------------------|
| 13. Arraras et al (2008), Spain              | 10, H                  | Prospective longitudinal observational | 72.3 $\pm$ 5.7 (range 65-87)                     | 48          | 48 (100)                                               | 100               | Breast (Stages I-III)  | RT:<br>Local<br>Locoregional<br>Regional<br><br>(no details on dosage)                                                                                                                                                                                                                               | EORTC QLQ-C30 (0-100)^<br>EORTC QLQ-BR23 (0-100)^ | <ul style="list-style-type: none"> <li>• 1<sup>st</sup> day of RT</li> <li>• Last day of RT</li> <li>• 6 weeks after RT</li> </ul>                                                   |
| 14. Browall et al (2008), Sweden             | 11, H                  | Prospective longitudinal observational | No information on mean age (range 65-77)         | 39          | 39 (100)                                               | 100               | Breast (Stages I-IIIa) | FEC:<br>Flurouracil 600 mg/m <sup>2</sup> ,<br>epirubicin 75 mg/m <sup>2</sup> ,<br>cyclophosphamide 600 mg/m <sup>2</sup><br>for 6 cycles<br><br>or<br><br>CMF:<br>Cyclophosphamide 100mg/m <sup>2</sup> ,<br>methotrexate 40 mg/m <sup>2</sup> ,<br>flurouracil 600 mg/m <sup>2</sup> for 6 cycles | EORTC QLQ-C30 (0-100)^<br>EORTC QLQ-BR23 (0-100)^ | <ul style="list-style-type: none"> <li>• Baseline</li> <li>• 1 week after 1<sup>st</sup>, 2<sup>nd</sup>, 3<sup>rd</sup> and last cycle of CT</li> <li>• 4 months post-CT</li> </ul> |
| 15. Crivellari et al (2000), Multi-countries | 9, M                   | RCT (longitudinal)                     | No information on mean age (age $\geq$ 65 years) | 76          | 58 (76.3)                                              | 100               | Breast (Grades I-III)  | Tamoxifen for 5 years<br><br>or<br><br>Tamoxifen plus 3 early courses of CMF (cyclophosphamide 100 mg/m <sup>2</sup> , methotrexate 40 mg/m <sup>2</sup> , 5-fluorouracil 600 mg/m <sup>2</sup> )                                                                                                    | PACIS (0-100)^                                    | <ul style="list-style-type: none"> <li>• Baseline</li> <li>• 2 months after 1<sup>st</sup> day of adjuvant therapy then every 3 months until 24 months</li> </ul>                    |
| 16. Dees et al (2000), USA                   | 9, M                   | Prospective longitudinal observational | 71.4 (range 65-79)                               | 17          | 17 (100)                                               | 100               | Breast (Early stage)   | AC:<br>Doxorubicin 60 mg/m <sup>2</sup> ,<br>cyclophosphamide 600 mg/m <sup>2</sup> for 4 cycles                                                                                                                                                                                                     | BCQ (0-10)^                                       | <ul style="list-style-type: none"> <li>• Day 1 of each cycle</li> <li>• 2 months after completing CT</li> <li>• 6 months after completing CT</li> </ul>                              |

1  
2  
3  
4  
5  
6  
7  
8  
9  
10  
11  
12  
13  
14  
15  
16  
17  
18  
19  
20  
21  
22  
23  
24  
25  
26  
27  
28  
29  
30  
31  
32  
33  
34  
35  
36  
37  
38  
39  
40  
41  
42  
43  
44  
45  
46  
47  
48  
49

|                                 |       |                                                  |                                                                           |     |            |     |                       |                                                                                                                                                                                                                                                                                                                                                                                                                                                                                                                                                                      |                                                 |                                                                                                                                                                                                                                                                                               |
|---------------------------------|-------|--------------------------------------------------|---------------------------------------------------------------------------|-----|------------|-----|-----------------------|----------------------------------------------------------------------------------------------------------------------------------------------------------------------------------------------------------------------------------------------------------------------------------------------------------------------------------------------------------------------------------------------------------------------------------------------------------------------------------------------------------------------------------------------------------------------|-------------------------------------------------|-----------------------------------------------------------------------------------------------------------------------------------------------------------------------------------------------------------------------------------------------------------------------------------------------|
| 17.Hurria et al (2006), USA     | 12, H | Prospective longitudinal observational           | 68 (range 65-84)                                                          | 49  | 49 (100)   | 100 | Breast (Stages I-III) | <p>CMF:<br/>Cyclophosphamide 600 mg/m<sup>2</sup>, methotrexate 40 mg/m<sup>2</sup>, 5-fluorouracil 600 mg/m<sup>2</sup> for 8 cycles</p> <p>or</p> <p>AC:<br/>Doxorubicin 60 mg/m<sup>2</sup>, cyclophosphamide 600 mg/m<sup>2</sup> for 4 cycles</p> <p>or</p> <p>ACT:<br/>AC followed by paclitaxel 175 mg/m<sup>2</sup> for 4 cycles or AC followed by paclitaxel 175 mg/m<sup>2</sup> for 12 cycles</p> <p>or</p> <p>ACT-H:<br/>ACT followed by trastuzumab 2 mg/kg for 52 weeks</p> <p><i>(CT regimen was at the discretion of the treating physician)</i></p> | FACT-B (0-148)^                                 | <ul style="list-style-type: none"> <li>• Prior to CT</li> <li>• Upon completion of CT</li> <li>• 6 months after CT</li> </ul>                                                                                                                                                                 |
| 18. Kornblith et al (2011), USA | 9, M  | RCT (longitudinal) ( <i>QoL is a sub-study</i> ) | Standard CT (CMF or AC) group 72 ± 4.6<br><br>Capecitabine group 72 ± 5.0 | 350 | 326 (93.1) | 100 | Breast Stages I-III   | <p>Standard CT</p> <p>CMF:<br/>Cyclophosphamide 100mg/m<sup>2</sup>, methotrexate 40 mg/m<sup>2</sup>, 5-fluorouracil 600 mg/m<sup>2</sup> for 6 cycles</p> <p>or</p> <p>AC:<br/>Adriamycin 60 mg/m<sup>2</sup>,</p>                                                                                                                                                                                                                                                                                                                                                 | #EORTC QLQ-C30 (0-100)^<br>#EORTC BR23 (0-100)^ | <ul style="list-style-type: none"> <li>• Baseline</li> <li>• Mid-CT (about day 77 for CMF, day 29 for AC, day 63 for capecitabine)</li> <li>• Post-CT (6 to 7 months for CMF, 4 to 5 months for AC and capecitabine)</li> <li>• 12 months post-baseline</li> <li>• 18 months post-</li> </ul> |

|                                        |       |                                                          |                                                                        |     |            |     |                     |                                                                                                                                                                                                                                                                 |                                                                                                                                            |                                                                                                                                                                                            |
|----------------------------------------|-------|----------------------------------------------------------|------------------------------------------------------------------------|-----|------------|-----|---------------------|-----------------------------------------------------------------------------------------------------------------------------------------------------------------------------------------------------------------------------------------------------------------|--------------------------------------------------------------------------------------------------------------------------------------------|--------------------------------------------------------------------------------------------------------------------------------------------------------------------------------------------|
|                                        |       |                                                          |                                                                        |     |            |     |                     |                                                                                                                                                                                                                                                                 | cyclophosphamide 600 mg/m <sup>2</sup> for 4 cycles                                                                                        | baseline                                                                                                                                                                                   |
|                                        |       |                                                          |                                                                        |     |            |     |                     |                                                                                                                                                                                                                                                                 | or                                                                                                                                         | • 24 months post-baseline                                                                                                                                                                  |
|                                        |       |                                                          |                                                                        |     |            |     |                     |                                                                                                                                                                                                                                                                 | Capecitabine 2000 mg/m <sup>2</sup> ; dose increased to 2500 mg/m <sup>2</sup> if no toxic effect after 1 <sup>st</sup> cycle for 6 cycles |                                                                                                                                                                                            |
| 19. Watters et al (2003), Canada       | 9, M  | Prospective longitudinal observational                   | 70±5 (range 65 to 80)                                                  | 20  | 16 (80)    | 100 | Breast Stages 1-III | Anthracycline-based adjuvant CT                                                                                                                                                                                                                                 | EORTC QLQ-C30 (0-100) <sup>^</sup><br>EORTC QLQ-BR23 (0-100) <sup>^</sup><br>SF-36 (0-100) <sup>^</sup>                                    | <ul style="list-style-type: none"> <li>• Prior to CT</li> <li>• Before the 3<sup>rd</sup> cycle</li> <li>• Completion of CT</li> <li>• 6 months post-CT</li> </ul>                         |
| 20. Perrone et al (2015), Italy        | 11, H | RCT (longitudinal)                                       | CMF: Median 71 (range 65-79)<br><br>Docetaxel: Median 71 (range 65-79) | 299 | 252 (84.3) | 100 | Breast Stages 1-III | Cyclophosphamide 600 mg/m <sup>2</sup> , methotrexate 40 mg/m <sup>2</sup> , fluorouracil 600 mg/m <sup>2</sup> on days 1 & 8 every 4 weeks for 4 or 6 cycles<br><br>or<br><br>Docetaxel 35 mg/m <sup>2</sup> on days 1, 8 & 15 every 4 weeks for 4 or 6 cycles | *EORTC QLQ-C30 (0-100) <sup>^</sup><br>*EORTC QLQ-BR23 (0-100) <sup>^</sup>                                                                | <ul style="list-style-type: none"> <li>• Baseline</li> <li>• End of 1<sup>st</sup> CT cycle</li> <li>• End of 2<sup>nd</sup> CT cycle</li> <li>• End of 3<sup>rd</sup> CT cycle</li> </ul> |
| 21. Gallego et al (2011), France       | 10, M | Prospective longitudinal (non-randomized phase II trial) | Median 77 (range 70-87)                                                | 70  | 59 (84.3)  | 60  | Glioblastoma        | Temozolomide (150-200 mg/m <sup>2</sup> for 5 days every 4 weeks for 12 cycles / until disease progression)<br><br>(adjusted based on toxicity)                                                                                                                 | *EORTC QLQ-C30 (0-100) <sup>^</sup><br>*EORTC QLQ-BN20 (0-100) <sup>^</sup>                                                                | <ul style="list-style-type: none"> <li>• Baseline</li> <li>• At least every month</li> </ul>                                                                                               |
| 22. Keime-Guibert et al (2007), France | 10, M | RCT (longitudinal)                                       | Supportive care + RT group Median 75 (range 70-84)                     | 39  | 35 (89.7)  | 37  | Glioblastoma        | Supportive care (corticosteroids & anticonvulsant agents, physical and psychological support, management by a                                                                                                                                                   | *EORTC QLQ-C30 (0-100) <sup>^</sup><br>*EORTC QLQ-BN20 (0-100) <sup>^</sup>                                                                | <ul style="list-style-type: none"> <li>• Baseline</li> <li>• Day 30</li> <li>• Day 60</li> <li>• Day 90</li> <li>• Day 135</li> </ul>                                                      |



1  
2  
3  
4  
5  
6  
7  
8  
9  
10  
11  
12  
13  
14  
15  
16  
17  
18  
19  
20  
21  
22  
23  
24  
25  
26  
27  
28  
29  
30  
31  
32  
33  
34  
35  
36  
37  
38  
39  
40  
41  
42  
43  
44  
45  
46  
47  
48  
49

palliative care team) &  
RT (1.8 Gy given 5  
days per week, total  
dose of 50 Gy)

|                                |       |                                          |                                 |     |           |      |                                                                                                                                                                                                            |                                                                                                                                                                                                                                                                           |                                                                                                    |                                                                                                                                                                                      |
|--------------------------------|-------|------------------------------------------|---------------------------------|-----|-----------|------|------------------------------------------------------------------------------------------------------------------------------------------------------------------------------------------------------------|---------------------------------------------------------------------------------------------------------------------------------------------------------------------------------------------------------------------------------------------------------------------------|----------------------------------------------------------------------------------------------------|--------------------------------------------------------------------------------------------------------------------------------------------------------------------------------------|
| 23.Minniti et al (2009), Italy | 9, M  | Prospective longitudinal observational   | Median 73 (range 70-79)         | 43  | 36 (83.7) | 51.2 | Glioblastoma                                                                                                                                                                                               | Focal hypofractionated RT (total dose of 30 Gy) followed by adjuvant temozolomide up to 12 cycles; 150 mg/m <sup>2</sup> for 1 <sup>st</sup> cycle and adjusted based on toxicity for subsequent cycles                                                                   | *EORTC QLQ-C30 (0-100)^                                                                            | <ul style="list-style-type: none"> <li>• Before RT</li> <li>• After RT</li> <li>• 2<sup>nd</sup>, 4<sup>th</sup> &amp; 6<sup>th</sup> cycles of temozolomide</li> </ul>              |
| 24.Minniti et al (2013), Italy | 10, H | Prospective longitudinal observational   | Median 73 (range 70-81)         | 65  | 65 (100)  | 49.2 | Glioblastoma                                                                                                                                                                                               | Focal hypofractionated RT (total dose of 40 Gy) plus concomitant temozolomide 75mg/m <sup>2</sup> given 7 days/week followed by adjuvant temozolomide for 12 cycles; 150 mg/m <sup>2</sup> for 1 <sup>st</sup> cycle and 200 mg/m <sup>2</sup> from 2 <sup>nd</sup> cycle | *EORTC QLQ-C30 (0-100)^<br>*EORTC QLQ-BN20 (0-100)^                                                | <ul style="list-style-type: none"> <li>• Before RT</li> <li>• 3-4 weeks after RT</li> <li>• Before CT</li> <li>• Every 8 weeks during treatment until disease progression</li> </ul> |
| 25.Mohile et al (2011), USA    | 7, M  | Prospective observational (before/after) | Median 74.1 (range 65-92) (≥65) | 368 | 368 (100) | 58.4 | Breast<br>Genitourinary<br>Lung<br>Brain and peripheral nervous system<br>Alimentary<br>Haematologic<br>Head and Neck<br>Soft tissue sarcoma:<br>Bone and cartilaginous<br>Skin<br>Gynecologic<br>Melanoma | RT<br>Median total dose of 57.6 Gy (range 30-161)                                                                                                                                                                                                                         | M.D. Anderson Symptom Inventory (with one rating of overall QOL on an 11-point horizontal scale) ^ | <ul style="list-style-type: none"> <li>• Before RT</li> <li>• After RT</li> </ul>                                                                                                    |
| 26.Arraras et al (2008), Spain | 8, M  | Prospective longitudinal (validation)    | 70.9 ± 5.2                      | 137 | 137 (100) | 0    | Prostate (Localized)                                                                                                                                                                                       | Lower risk:<br>RT alone (total dose of 72 Gy)                                                                                                                                                                                                                             | EORTC QLQ-C30 (0-100)^                                                                             | <ul style="list-style-type: none"> <li>• 1<sup>st</sup> day of RT</li> <li>• Last day of RT</li> <li>• 6 weeks after RT</li> </ul>                                                   |

Intermediate risk:

Neoadjuvant and concomitant combination of an anti-androgen and an LHRH analogue (6 months) + RT (total dose of 76 Gy)

High risk:  
Neoadjuvant and concomitant combination of an anti-androgen and an LHRH analogue (6 months) + RT (total dose of 76 Gy) + adjuvant LHRH analogue

For peer review only

|                                     |       |                                        |                                             |                                                                                                              |           |     |                      |                                                                                                            |                                                                |                                                                                                                                                                                                                                                  |
|-------------------------------------|-------|----------------------------------------|---------------------------------------------|--------------------------------------------------------------------------------------------------------------|-----------|-----|----------------------|------------------------------------------------------------------------------------------------------------|----------------------------------------------------------------|--------------------------------------------------------------------------------------------------------------------------------------------------------------------------------------------------------------------------------------------------|
| 27. Bouvier et al (2008), France    | 11, H | Prospective longitudinal observational | No information on mean age (range 75 – 85+) | 11 (only 11 patients with stage III colon cancer treated with adjuvant CT and their QoL scores are reported) | 11 (100)  | NR  | Colon                | Fluorouracil<br>or<br>Oxaliplatin plus fluorouracil<br>or<br>Capecitabine<br><i>(no details on dosage)</i> | EORTC QLQ-C30 (0-100)^                                         | <ul style="list-style-type: none"> <li>• Baseline</li> <li>• 3 months after diagnosis</li> <li>• 6 months after diagnosis (<i>CT was given within 6 months after surgery</i>)</li> <li>• 12 months after diagnosis</li> </ul>                    |
| 28. Chang et al (2012), South Korea | 9, H  | Prospective longitudinal observational | Median 74.5 (range 70-90)                   | 82                                                                                                           | 57 (69.5) | 64  | Colon Stages II-III  | Capecitabine (oral, 750-1250 mg/m <sup>2</sup> for 8 cycles) (dose level was based a/c toxicity effects)   | EORTC QLQ-C30 (0-100)^                                         | <ul style="list-style-type: none"> <li>• Baseline</li> <li>• 3 months during CT</li> <li>• 9 months during CT</li> <li>• 3-6 months after completion</li> </ul>                                                                                  |
| 29. Caffo et al (2003), Italy       | 10, H | Prospective longitudinal observational | Median 62.5 (range 46-81)                   | 25 (no information on the breakdown of sample size by age group)                                             | -         | 100 | Cervical endometrium | Post-operative pelvic RT (median total dose of 50.4 Gy)                                                    | Authors' developed diary card (0-4)^<br>EORTC QLQ-C30 (0-100)^ | <p>Diary card:</p> <ul style="list-style-type: none"> <li>• At the start of RT</li> <li>• Daily during RT period (reported as mean weekly scores)</li> </ul> <p>EORTC QLQ-C30:</p> <ul style="list-style-type: none"> <li>• Before RT</li> </ul> |

1  
2  
3  
4  
5  
6  
7  
8  
9  
10  
11  
12  
13  
14  
15  
16  
17  
18  
19  
20  
21  
22  
23  
24  
25  
26  
27  
28  
29  
30  
31  
32  
33  
34  
35  
36  
37  
38  
39  
40  
41  
42  
43  
44  
45  
46  
47  
48  
49

|                                   |      |                                        |                         |    |          |     |                                                                          |                                                                                                                                                                 |                                                   |                                                                                            |            |
|-----------------------------------|------|----------------------------------------|-------------------------|----|----------|-----|--------------------------------------------------------------------------|-----------------------------------------------------------------------------------------------------------------------------------------------------------------|---------------------------------------------------|--------------------------------------------------------------------------------------------|------------|
|                                   |      |                                        |                         |    |          |     |                                                                          |                                                                                                                                                                 |                                                   |                                                                                            | • After RT |
| 30.Park et al (2013), South Korea | 11,H | Prospective longitudinal observational | Median 69 (range 65-82) | 66 | 66 (100) | 9.1 | Non-small-cell lung carcinoma (completely resected stage Ib, II or IIIa) | NP: Cisplatin 80mg/m <sup>2</sup> , vinorelbine 25mg/m <sup>2</sup> for 4 cycles<br><br>or<br><br>PC: Carboplatin, paclitaxel 175mg/m <sup>2</sup> for 4 cycles | EORTC QLQ-C30 (0-100)^<br>EORTC QLQ-LC13 (0-100)^ | • Before 1 <sup>st</sup> dose of CT at each cycle<br>• 1 month after 4 <sup>th</sup> cycle |            |

^Higher score indicating better quality of life; # Quality of life is the primary endpoint if indicated; \* Quality of life is the secondary endpoint if indicated; H is high methodological quality; M is moderate methodological quality

Abbreviations:  
 BCQ, Breast Cancer Chemotherapy Questionnaire; CT, chemotherapy; EORTC QLQ-C30, European Organization for Research and Treatment of Cancer QLQ-C30 general questionnaire; EORTC QLQ-BR23, European Organization for Research and Treatment of Cancer specific module for breast cancer; EORTC QLQ-BN20, European Organization for Research and Treatment of Cancer specific module for brain cancer; EORTC QLQ-LC13, European Organization for Research and Treatment of Cancer for lung-specific questionnaire; FACT-B, Functional Assessment of Cancer Therapy-Breast cancer; NR, not reported; QoL, quality of life; PACIS, Perceived adjustment to chronic illness scale; RCT, randomized controlled trial; RT, radiotherapy

**Table 2. Baseline characteristics and the main findings of QoL in the 18 studies**

| Study                     | Comprehensive Geriatric Assessment domains | Functional status at baseline<br><i>(Functional status during adjuvant therapy if reported)</i>                                                                    | Co-morbid condition at baseline                 | Measurement of CT/RT related toxicity/adverse effect | Toxicity/Adverse effect                                                                                                    | Global or overall QoL at baseline | Global or overall QoL's findings<br><i>(Other QoL domains/subscales if reported)</i>                                                                                                                                                                                                                                                                                                                                                                                                                                                                                                                                                                                                                                                                    |
|---------------------------|--------------------------------------------|--------------------------------------------------------------------------------------------------------------------------------------------------------------------|-------------------------------------------------|------------------------------------------------------|----------------------------------------------------------------------------------------------------------------------------|-----------------------------------|---------------------------------------------------------------------------------------------------------------------------------------------------------------------------------------------------------------------------------------------------------------------------------------------------------------------------------------------------------------------------------------------------------------------------------------------------------------------------------------------------------------------------------------------------------------------------------------------------------------------------------------------------------------------------------------------------------------------------------------------------------|
| 13. Arraras et al 2008    | KPS<br>Co-morbidity<br>Daily activities    | KPS mean 94.9<br><br><i>During therapy: KPS decreased from baseline to last dose of RT (mean difference 4.7 [0-100] but returned to baseline 6 weeks after RT)</i> | Limiting co-morbidity 62.5%                     | Selected items from NCI CTCAE                        | At last day of RT:<br>Levels 2-3 skin toxicity 8.4%<br>Level 2 dysphagia 4.2%<br>Level 2 fatigue 4.2%<br>Level 2 pain 2.1% | 59.5 (0 – 100)                    | <ul style="list-style-type: none"> <li>Global or overall QoL improved significantly from baseline to final evaluation</li> </ul> <p><i>Subscales</i></p> <ul style="list-style-type: none"> <li>Significant worsening in physical and role functioning, and fatigue, pain, and breast symptoms in last day of RT but improved at 6 weeks after RT (final evaluation)</li> </ul>                                                                                                                                                                                                                                                                                                                                                                         |
| 14. Browall et al 2008    | Co-morbidity                               | NR                                                                                                                                                                 | 1 or 2 co-morbidity 61%<br>≥3 co-morbidities 3% | NR                                                   | NR                                                                                                                         | 76 (0 – 100)                      | <ul style="list-style-type: none"> <li>Global health status decreased significantly from baseline to mid-treatment and last dose of CT. The decrease in global health status had not fully recovered to baseline level at 4 months post-CT</li> </ul> <p><i>Subscales</i></p> <ul style="list-style-type: none"> <li>Physical (mean difference 15*), role (mean difference 17*), social (mean difference 14*) and cognitive (mean difference 5*) functioning decreased significantly from baseline to last dose of CT</li> <li>The decrease in physical and role functioning had not fully recovered to baseline levels at 4 months post-CT</li> <li>No significant change in future perspective, emotional and sexual functioning over time</li> </ul> |
| 15. Crivellari et al 2000 | ECOG                                       | ECOG ≤2 for subjects to be eligible                                                                                                                                | NR                                              | Modified WHO toxicity criteria                       | Grade 3 haematological toxicity 9.2%<br>Other grade 3 toxicity 6.6%                                                        | 59 (0 – 100)                      | <ul style="list-style-type: none"> <li>Global or overall QoL improved progressively across study points, and from baseline to final evaluation</li> </ul>                                                                                                                                                                                                                                                                                                                                                                                                                                                                                                                                                                                               |
| 16. Dees et al 2000       | NR                                         | NR                                                                                                                                                                 | NR                                              | Myelosuppression<br>Cardiotoxicity                   | Neutropaenic complications and alteration in cardiac function were not                                                     | 7.65 (0 – 10)                     | <ul style="list-style-type: none"> <li>Global or overall QoL decreased from baseline to last dose of CT but not significant</li> </ul>                                                                                                                                                                                                                                                                                                                                                                                                                                                                                                                                                                                                                  |

1  
2  
3  
4  
5  
6  
7  
8  
9  
10  
11  
12  
13  
14  
15  
16  
17  
18  
19  
20  
21  
22  
23  
24  
25  
26  
27  
28  
29  
30  
31  
32  
33  
34  
35  
36  
37  
38  
39  
40  
41  
42  
43  
44  
45  
46  
47  
48  
49

| 17.Hurria et al<br>2006    | CCI<br>ADL<br>IADL<br>MMSE<br>GDS<br>BMI                                                                                                         | NR                                                                        | CCI mean 3                                                                                                     | NCI CTCAE                                                          | Grade 3 or 4<br>haematological<br>toxicity 27%<br>Grade 3 or 4 non-<br>haematological<br>toxicity 31%                             | 116 (0 – 148)                                                           | <p>significantly age<br/>related, no clinically<br/>significant age<br/>related trends in<br/>toxicity</p> <ul style="list-style-type: none"> <li>• No significant longitudinal change in total QoL across all time points</li> </ul> <p><i>Subscales</i></p> <ul style="list-style-type: none"> <li>• No significant longitudinal change in physical, social, emotional and functional well-being across all time points</li> </ul>                                                                                                                                                                                                                                               |
|----------------------------|--------------------------------------------------------------------------------------------------------------------------------------------------|---------------------------------------------------------------------------|----------------------------------------------------------------------------------------------------------------|--------------------------------------------------------------------|-----------------------------------------------------------------------------------------------------------------------------------|-------------------------------------------------------------------------|------------------------------------------------------------------------------------------------------------------------------------------------------------------------------------------------------------------------------------------------------------------------------------------------------------------------------------------------------------------------------------------------------------------------------------------------------------------------------------------------------------------------------------------------------------------------------------------------------------------------------------------------------------------------------------|
| 18.Kornblith et al<br>2011 | ECOG<br>OARS (Co-<br>morbidity)<br>HADS<br>BOMC<br>Neurobehavioral<br>Functioning &<br>Activities of<br>Living Scale<br>Social Support<br>Survey | ECOG 0-2 for subjects<br>to be eligible<br>Grades 0-1, 96%<br>Grade 2, 4% | 0 co-morbidity<br>4.9%<br>1 co-morbidity<br>11.4%<br>2-3 co-<br>morbidity 21.1%<br>4-10 co-<br>morbidity 16.3% | NCI CTCAE<br>Systemic adverse<br>effects subscale<br>of EORTC BR23 | Patients treated with<br>capecitabine has<br>significantly fewer<br>adverse effects<br>during and at the<br>completion of CT      | 75.4 (0 – 100)<br>(standard CT)<br><br>76.5 (0 – 100)<br>(capecitabine) | <ul style="list-style-type: none"> <li>• Patients treated with capecitabine had significantly better global QoL than standard CT group. This difference had resolved by 12 months with no further difference at 24 months</li> </ul> <p><i>Subscales</i></p> <ul style="list-style-type: none"> <li>• Patients treated with capecitabine had significantly better role and social functioning, less fatigue, less nausea and vomiting, less constipation, and better appetite, and less psychological distress than standard CT group at mid-treatment and at treatment completion. These differences had resolved by 12 months with no further difference at 24 months</li> </ul> |
| 19.Watters et al<br>2003   | NR                                                                                                                                               | NR                                                                        | NR                                                                                                             | NR                                                                 | NR                                                                                                                                | 78 (0-100)                                                              | <ul style="list-style-type: none"> <li>• Global or overall QoL decreased significantly from baseline to completion of but improved at 6 months post-CT</li> </ul> <p><i>Subscales</i></p> <ul style="list-style-type: none"> <li>• Role (mean difference 21<sup>*</sup>) and social (mean difference 9) functioning decreased significantly from baseline to completion of CT but improved at 6 months post-CT</li> </ul>                                                                                                                                                                                                                                                          |
| 20.Perrone et al<br>2015   | ECOG<br>CCI<br>ADL<br>IADL                                                                                                                       | ECOG<br>Grade 0, 83%<br>Grade 1, 17%                                      | No comorbidity<br>60%<br>1 comorbidity<br>31%<br>≥2 comorbidities<br>8%                                        | NCI CTCAE                                                          | Severe (grade >2)<br>haematological<br>toxicity was<br>suffered by 70% of<br>patients with CMF<br>and 9% with<br>docetaxel, while | NR                                                                      | Global or overall QoL decreased from baseline to mid-treatment but not significant                                                                                                                                                                                                                                                                                                                                                                                                                                                                                                                                                                                                 |

|                              |                                                   |                                                                                                                                              |    |           |                                                                                                                                                                                            |                                       |                                                                                                                                                                                                                                                                                                                                                                                                                                                                                                                                                                         |
|------------------------------|---------------------------------------------------|----------------------------------------------------------------------------------------------------------------------------------------------|----|-----------|--------------------------------------------------------------------------------------------------------------------------------------------------------------------------------------------|---------------------------------------|-------------------------------------------------------------------------------------------------------------------------------------------------------------------------------------------------------------------------------------------------------------------------------------------------------------------------------------------------------------------------------------------------------------------------------------------------------------------------------------------------------------------------------------------------------------------------|
|                              |                                                   |                                                                                                                                              |    |           | severe non-haematological toxicity was reported in 19% patients with CMF and 28% with docetaxel                                                                                            |                                       |                                                                                                                                                                                                                                                                                                                                                                                                                                                                                                                                                                         |
| 21. Gallego et al 2011       | KPS (<70 as eligibility criteria)<br>MMSE         | Baseline:<br>KPS <70 for subjects to be eligible<br><br><i>During therapy:<br/>33% improved their KPS by ≥10, before disease progression</i> | NR | NCI CTCAE | Grade 3 or 4 haematological toxicity 25%                                                                                                                                                   | NR                                    | <ul style="list-style-type: none"> <li>Global or overall QoL improved significantly over time</li> </ul> <p><i>Subscales</i></p> <ul style="list-style-type: none"> <li>Physical, role, cognitive and social functioning scores improved significantly over time</li> <li>For QLQ-BN20, scores on motor dysfunction, drowsiness, and bladder control improved over time before disease progression</li> </ul>                                                                                                                                                           |
| 22. Keime-Guibert et al 2007 | KPS (≥70 as eligibility criteria)<br>MMSE         | Baseline<br>KPS ≥70 for subjects to be eligible<br><br><i>During therapy:<br/>KPS declined over time</i>                                     | NR | NCI CTCAE | No severe adverse effects related to RT                                                                                                                                                    | 62.9 (0 – 100) (supportive care + RT) | <ul style="list-style-type: none"> <li>Global or overall QoL decreased significantly from baseline to immediately completion of RT</li> </ul> <p><i>Subscales</i></p> <ul style="list-style-type: none"> <li>During and after treatment, scores were significantly worse over time on physical, cognitive and social functioning, and fatigue and motor dysfunction</li> </ul>                                                                                                                                                                                          |
| 23. Minniti et al 2009       | KPS (≥60 as eligibility criteria)<br>Co-morbidity | Baseline:<br>KPS ≥60 for subjects to be eligible<br>KPS median 70<br><br><i>KPS did not change significantly during the study period</i>     | NR | NCI CTCAE | Grades 2-3 confusion and/or somnolence during or after RT 16%<br><br>Grade 3-4 haematological during CT 28%<br><br>Moderate-severe fatigue 35%, nausea 10%, constipation 22%, skin rash 9% | 58.3 (0-100)                          | <ul style="list-style-type: none"> <li>During treatment, score of global health status did not change significantly</li> </ul> <p><i>Subscales</i></p> <ul style="list-style-type: none"> <li>During treatment, scores of functioning subscale, nausea and vomiting, and insomnia did not change significantly</li> <li>Fatigue and constipation scales worsened slightly from baseline through treatment</li> <li>Scores of physical, role and social functioning, and fatigue deteriorated significantly between baseline and the 2<sup>nd</sup> follow up</li> </ul> |
| 24. Minniti et al            | KPS                                               | KPS ≥60 for subjects to                                                                                                                      | NR | NR        | NR                                                                                                                                                                                         | 61.5 (0-100)                          | <ul style="list-style-type: none"> <li>Global health improved significantly over time</li> </ul>                                                                                                                                                                                                                                                                                                                                                                                                                                                                        |

1  
2  
3  
4  
5  
6  
7  
8  
9  
10  
11  
12  
13  
14  
15  
16  
17  
18  
19  
20  
21  
22  
23  
24  
25  
26  
27  
28  
29  
30  
31  
32  
33  
34  
35  
36  
37  
38  
39  
40  
41  
42  
43  
44  
45  
46  
47  
48  
49

|                          |                 |                                                           |                                |           |                                                                                       |    |                |  |
|--------------------------|-----------------|-----------------------------------------------------------|--------------------------------|-----------|---------------------------------------------------------------------------------------|----|----------------|--|
| 2013                     | MMSE            | be eligible<br>KPS median 70                              |                                |           |                                                                                       |    |                |  |
| 25.Mohile et al<br>2011  | No              | NR                                                        | NR                             | NR        | NR                                                                                    | NR | 2.07 (0-10)    |  |
| 26.Arraras et al<br>2008 | KPS             | KPS mean 96.1                                             | NR                             | NR        | NR                                                                                    | NR | 66.8 (0 – 100) |  |
| 27.Bouvier et al<br>2008 | NR              | NR                                                        | NR                             | NR        | NR                                                                                    | NR | 60             |  |
| 28.Chang et al<br>2012   | ECOG PS<br>CACI | ECOG<br>Grade 0, 4.9%<br>Grade 1, 63.4%<br>Grade 2, 31.7% | CACI<br>≤7, 75.6%<br>≥8, 24.4% | NCI CTCAE | Grade 3 or 4<br>haematological<br>toxicity <1%<br>Grade 3 hand-foot<br>syndrome 25.6% | NR |                |  |

*Subscales*

- Social (mean difference 10.4\*) and cognitive (mean difference 9.5\*) functioning improved significantly from baseline to 6 months from the start of RT
- Fatigue (mean difference 5.6\*) worsened significantly from baseline to 4 months from the start of RT

- There was an increase of QoL score after RT, however, no information about the p-value
- Prevalence of symptoms interfered with QoL increased insignificantly from 49.1% to 58.8% pre and post-RT
- Severity of symptoms interfered with QoL increased insignificantly from 2.07 to 2.37 pre and post-RT

*Subscales*

- The prevalence of memory difficulties and sleep disturbance, and the severity of fatigue and distress significantly increased over the course of RT

- No change in global or overall QoL score from baseline to last dose of RT but significantly improved between last dose and 6 weeks after RT

- Graph shows the mean scores of global health increased over time (but no information about the p-value)

- No significant worsening of global or overall QoL during CT

*Subscales*

- No significant worsening of functional QoL during CT
- A slight and insignificant deterioration in social and cognitive functioning at 3 months during CT but recovered over time

|                        |                      |                                         |                                                             |           |                                                                                       |              |                                                                                                                                                                                                                    |
|------------------------|----------------------|-----------------------------------------|-------------------------------------------------------------|-----------|---------------------------------------------------------------------------------------|--------------|--------------------------------------------------------------------------------------------------------------------------------------------------------------------------------------------------------------------|
| 29.Caffo et al<br>2003 | NR                   | NR                                      | NR                                                          | Diarrhoea | The mean no. of<br>daily stools<br>progressively<br>increased during the<br>treatment | 2.11 (0 – 4) | <ul style="list-style-type: none"> <li>•No symptoms were significantly exacerbated during therapy</li> <li>•QoL score improved progressively across study points, and from baseline to final evaluation</li> </ul> |
| 30.Park et al<br>2013  | ECOG<br>Co-morbidity | ECOG 0-1 for subjects<br>to be eligible | 0 co-morbidity<br>71.2%<br>Any comorbid<br>conditions 28.8% | NCI CTCAE | Grade 3<br>neutropaenia<br>39.4%, anaemia<br>4.5%,<br>thrombocytopaenia<br>1.5%       | 52 (0-100)   | <ul style="list-style-type: none"> <li>•Global or overall QoL did not significantly deteriorate over time</li> </ul>                                                                                               |

\* Significant difference ( $p < 0.05$ )

Abbreviations:

ADLs, Activities of Daily Living; BMI, Body Mass Index; BOMC, Blessed Orientation-Memory-Concentration test; CACI, Charlson-Age Comorbidity Index; CCI, Charlson Comorbidity Index; CT, chemotherapy; ECOG, Eastern Cooperative Oncology Group; GDS, Geriatric Depression Scale; IADLs, Instrumental Activities of Daily Living; MMSE, Mini-Mental State Examination; KPS, Karnofsky Performance Status Scale; NCI CTC, National Cancer Institute Common Toxicity Criteria; NR, not reported; OARS, Older American Resources and Services Questionnaire; RT, radiotherapy



1  
2  
3  
4  
5  
6  
7  
8  
9  
10  
11  
12  
13  
14  
15  
16  
17  
18  
19  
20  
21  
22  
23  
24  
25  
26  
27  
28  
29  
30  
31  
32  
33  
34  
35  
36  
37  
38  
39  
40  
41  
42  
43  
44  
45  
46  
47  
48  
49

For peer review only

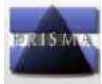

# PRISMA 2009 Checklist

1  
2  
3  
4  
5  
6  
7  
8  
9  
10  
11  
12  
13  
14  
15  
16  
17  
18  
19  
20  
21  
22  
23  
24  
25  
26  
27  
28  
29  
30  
31  
32  
33  
34  
35  
36  
37  
38  
39  
40  
41  
42  
43  
44  
45  
46  
47  
48  
49

| Section/topic                      | #  | Checklist item                                                                                                                                                                                                                                                                                              | Reported on page # |
|------------------------------------|----|-------------------------------------------------------------------------------------------------------------------------------------------------------------------------------------------------------------------------------------------------------------------------------------------------------------|--------------------|
| <b>TITLE</b>                       |    |                                                                                                                                                                                                                                                                                                             |                    |
| Title                              | 1  | Identify the report as a systematic review, meta-analysis, or both.                                                                                                                                                                                                                                         | √                  |
| <b>ABSTRACT</b>                    |    |                                                                                                                                                                                                                                                                                                             |                    |
| Structured summary                 | 2  | Provide a structured summary including, as applicable: background; objectives; data sources; study eligibility criteria, participants, and interventions; study appraisal and synthesis methods; results; limitations; conclusions and implications of key findings; systematic review registration number. | √                  |
| <b>INTRODUCTION</b>                |    |                                                                                                                                                                                                                                                                                                             |                    |
| Rationale                          | 3  | Describe the rationale for the review in the context of what is already known.                                                                                                                                                                                                                              | √                  |
| Objectives                         | 4  | Provide an explicit statement of questions being addressed with reference to participants, interventions, comparisons, outcomes, and study design (PICOS).                                                                                                                                                  | √                  |
| <b>METHODS</b>                     |    |                                                                                                                                                                                                                                                                                                             |                    |
| Protocol and registration          | 5  | Indicate if a review protocol exists, if and where it can be accessed (e.g., Web address), and, if available, provide registration information including registration number.                                                                                                                               | No                 |
| Eligibility criteria               | 6  | Specify study characteristics (e.g., PICOS, length of follow-up) and report characteristics (e.g., years considered, language, publication status) used as criteria for eligibility, giving rationale.                                                                                                      | √                  |
| Information sources                | 7  | Describe all information sources (e.g., databases with dates of coverage, contact with study authors to identify additional studies) in the search and date last searched.                                                                                                                                  | √                  |
| Search                             | 8  | Present full electronic search strategy for at least one database, including any limits used, such that it could be repeated.                                                                                                                                                                               | √                  |
| Study selection                    | 9  | State the process for selecting studies (i.e., screening, eligibility, included in systematic review, and, if applicable, included in the meta-analysis).                                                                                                                                                   | √                  |
| Data collection process            | 10 | Describe method of data extraction from reports (e.g., piloted forms, independently, in duplicate) and any processes for obtaining and confirming data from investigators.                                                                                                                                  | √                  |
| Data items                         | 11 | List and define all variables for which data were sought (e.g., PICOS, funding sources) and any assumptions and simplifications made.                                                                                                                                                                       | √                  |
| Risk of bias in individual studies | 12 | Describe methods used for assessing risk of bias of individual studies (including specification of whether this was done at the study or outcome level), and how this information is to be used in any data synthesis.                                                                                      | √                  |
| Summary measures                   | 13 | State the principal summary measures (e.g., risk ratio, difference in means).                                                                                                                                                                                                                               | √                  |
| Synthesis of results               | 14 | Describe the methods of handling data and combining results of studies, if done, including measures of consistency (e.g., $I^2$ for each meta-analysis).                                                                                                                                                    | √                  |

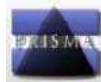

# PRISMA 2009 Checklist

Page 1 of 2

| Section/topic                 | #  | Checklist item                                                                                                                                                                                           | Reported on page # |
|-------------------------------|----|----------------------------------------------------------------------------------------------------------------------------------------------------------------------------------------------------------|--------------------|
| Risk of bias across studies   | 15 | Specify any assessment of risk of bias that may affect the cumulative evidence (e.g., publication bias, selective reporting within studies).                                                             | √                  |
| Additional analyses           | 16 | Describe methods of additional analyses (e.g., sensitivity or subgroup analyses, meta-regression), if done, indicating which were pre-specified.                                                         | √                  |
| <b>RESULTS</b>                |    |                                                                                                                                                                                                          |                    |
| Study selection               | 17 | Give numbers of studies screened, assessed for eligibility, and included in the review, with reasons for exclusions at each stage, ideally with a flow diagram.                                          | √                  |
| Study characteristics         | 18 | For each study, present characteristics for which data were extracted (e.g., study size, PICOS, follow-up period) and provide the citations.                                                             | √                  |
| Risk of bias within studies   | 19 | Present data on risk of bias of each study and, if available, any outcome level assessment (see item 12).                                                                                                | √                  |
| Results of individual studies | 20 | For all outcomes considered (benefits or harms), present, for each study: (a) simple summary data for each intervention group (b) effect estimates and confidence intervals, ideally with a forest plot. | √                  |
| Synthesis of results          | 21 | Present results of each meta-analysis done, including confidence intervals and measures of consistency.                                                                                                  | √                  |
| Risk of bias across studies   | 22 | Present results of any assessment of risk of bias across studies (see Item 15).                                                                                                                          | √                  |
| Additional analysis           | 23 | Give results of additional analyses, if done (e.g., sensitivity or subgroup analyses, meta-regression [see Item 16]).                                                                                    | √                  |
| <b>DISCUSSION</b>             |    |                                                                                                                                                                                                          |                    |
| Summary of evidence           | 24 | Summarize the main findings including the strength of evidence for each main outcome; consider their relevance to key groups (e.g., healthcare providers, users, and policy makers).                     | √                  |
| Limitations                   | 25 | Discuss limitations at study and outcome level (e.g., risk of bias), and at review-level (e.g., incomplete retrieval of identified research, reporting bias).                                            | √                  |
| Conclusions                   | 26 | Provide a general interpretation of the results in the context of other evidence, and implications for future research.                                                                                  | √                  |
| <b>FUNDING</b>                |    |                                                                                                                                                                                                          |                    |
| Funding                       | 27 | Describe sources of funding for the systematic review and other support (e.g., supply of data); role of funders for the systematic review.                                                               | NA                 |

From: Moher D, Liberati A, Tetzlaff J, Altman DG, The PRISMA Group (2009). Preferred Reporting Items for Systematic Reviews and Meta-Analyses: The PRISMA Statement. PLoS Med 6(6): e1000097. doi:10.1371/journal.pmed1000097

For more information, visit: [www.prisma-statement.org](http://www.prisma-statement.org).

Page 2 of 2

For peer review only - <http://bmjopen.bmj.com/site/about/guidelines.xhtml>

# BMJ Open

## Quality of life of elderly patients with solid tumours undergoing adjuvant cancer therapy: a systematic review

|                                 |                                                                                                                                                                                |
|---------------------------------|--------------------------------------------------------------------------------------------------------------------------------------------------------------------------------|
| Journal:                        | <i>BMJ Open</i>                                                                                                                                                                |
| Manuscript ID                   | bmjopen-2017-018101.R1                                                                                                                                                         |
| Article Type:                   | Research                                                                                                                                                                       |
| Date Submitted by the Author:   | 19-Sep-2017                                                                                                                                                                    |
| Complete List of Authors:       | Cheng, Karis, Kin-Fong; National University of Singapore;<br>Lim, Ethel, Yee-Ting; National University of Singapore<br>Kanesvaran, Ravindran; National Cancer Centre Singapore |
| <b>Primary Subject Heading</b>: | Oncology                                                                                                                                                                       |
| Secondary Subject Heading:      | Geriatric medicine                                                                                                                                                             |
| Keywords:                       | Elderly cancer patients, Adjuvant therapy, Quality of life, CHEMOTHERAPY, RADIOTHERAPY, ONCOLOGY                                                                               |
|                                 |                                                                                                                                                                                |

SCHOLARONE™  
Manuscripts

1  
2  
3  
4  
5  
6  
7  
8 **Quality of life of elderly patients with solid tumours undergoing adjuvant cancer**  
9 **therapy: a systematic review**  
10

11  
12  
13  
14 CHENG Karis, Kin-fong<sup>1</sup>; LIM Ethel Yee Ting<sup>1</sup>; KANESVARAN Ravindran<sup>2</sup>  
15

16 <sup>1</sup>Alice Lee Centre for Nursing Studies, Yong Loo Lin School of Medicine,  
17 MD11, 10 Medical Drive, National University of Singapore, National University Health  
18 System, Singapore 117597  
19

20 <sup>2</sup>National Cancer Centre Singapore, 11 Hospital Drive, Singapore 169610  
21  
22  
23  
24  
25  
26  
27  
28  
29

30 Corresponding author:

31 CHENG Karis, Kin-fong

32 RN, PGDip Epidemiol & Biostat, PhD

33 Level 2, Block MD11, 10 Medial Drive, National University of Singapore, Singapore 117597

34 DID: (65) 6516 3117, Fax: (65) 6776 7135, E-mail: [nurckfk@nus.edu.sg](mailto:nurckfk@nus.edu.sg) or

35 [karis\\_cheng@nuhs.edu.sg](mailto:karis_cheng@nuhs.edu.sg)  
36  
37  
38  
39  
40  
41  
42  
43  
44  
45  
46  
47  
48  
49  
50  
51  
52  
53  
54  
55  
56  
57  
58  
59  
60

## Abstract

### Objectives

The measurement of quality of life (QoL) in elderly cancer population is increasingly being recognized as an important element of clinical decision-making and the evaluation of treatment outcome. This systematic review aimed to summarise the evidence of global or overall QoL during and after adjuvant therapy in elderly cancer patients.

### Methods

A systematic search was conducted of studies published from inception to December 2016 through major databases. Eligible studies included RCTs and non-RCTs in which QoL was measured in elderly patients (65 years of age or above) with stage I to III solid tumours who were undergoing adjuvant chemotherapy and/or radiotherapy. Because of the heterogeneity and the insufficient data, the results were synthesised narratively.

### Results

We included 4 RCTs and 14 non-RCTs on 1,633 participants who completed the baseline QoL questionnaire. In all four RCTs, the risk of bias was low or unclear for most items but high for detection. Of the 14 non-RCTs, 5 studies were judged to have a low or moderate risk of bias for all domains, and the other 9 studies had a serious risk of bias in at least one domain. The bias was observed mainly in the confounding and in the selection of participants for the study. For most elderly patients with breast cancer, the non-significant negative change in the QoL was transient. A significant increase in the QoL during the course of temozolomide in elderly patients with glioblastoma but a decreasing trend in QoL after radiotherapy was shown. This review also shows a uniform trend of stable or improved QoL

1  
2  
3 during adjuvant therapy and at follow-up evaluations across the studies with prostate, colon  
4  
5 or cervical cancer population.  
6  
7

## 8 9 **Conclusions**

10  
11 This review suggests that adjuvant chemotherapy and radiotherapy may not have detrimental  
12  
13 effects on QoL in most elderly patients with solid tumours.  
14  
15  
16  
17

## 18 19 **Strengths and limitations of this study**

- 20  
21 • A systematic search of the published literature in major databases from their inception  
22 to December 2016 was conducted.
- 23  
24 • The risk of bias and the methodological aspects of quality of life reporting in the  
25 included studies were assessed.
- 26  
27 • The search of grey literature, unpublished studies, ongoing clinical trials, and theses  
28 and dissertations were not conducted.
- 29  
30 • The studies included in this review are mainly non-randomized controlled trials.
- 31  
32 • The meta-analysis was not conducted to pool the data and the GRADE approach was  
33 not used to assess the quality of evidence of the included studies.  
34  
35  
36  
37  
38  
39  
40  
41

## 42 **Keywords**

43  
44 Elderly cancer patients, adjuvant therapy, quality of life, chemotherapy, radiotherapy,  
45 oncology  
46  
47  
48  
49  
50  
51  
52  
53  
54  
55  
56  
57  
58  
59  
60

## Introduction

In many countries, the incidence of cancer among older people is increasing. This increase can be attributed to the remarkable growth of the elderly demographic and the common pathophysiology of cancer and aging.<sup>1-2</sup> As a result, the demands for and the importance of broadening clinical trials to include older adults, incorporating geriatric-specific endpoints,<sup>3</sup> and integrating geriatric assessment to address the needs of individuals are also increasing.<sup>4</sup> Although quality of life (QoL) is not formally a part of the geriatric assessment, the measurement of QoL in the elderly cancer population is increasingly being recognized as an important patient-reported outcome to complement both the clinician's evaluation of disease progression and the determination of the clinical benefit and burden of cancer treatment, along with toxicity, survival and mortality rates. QoL is also considered a useful outcome measure to enhance patient-clinician communication and patient compliance in elderly patients with breast cancer during cancer treatment.<sup>5</sup> In a short literature review, Wedding et al. (2007) reported that elderly cancer patients tend to perceive their QoL as more important than gains in survival when compared to younger patients.<sup>6</sup> Nevertheless, our understanding of the effect of cancer treatment on the QoL of elderly patients remains very limited. Clinically, the decisions regarding cancer therapy and the clinical management of elderly cancer patients may be complicated by their vulnerability to chemo-toxicity and the pathological changes of aging together with different considerations of the treatment benefit and harm margins, functional decline, tolerability and QoL issues. A univariate analysis by Extermann et al. (2015) revealed an association of the QoL effect with dose modification of chemotherapy in older patients.<sup>7</sup> The literature states that elderly cancer patients are less likely than their younger counterparts to be treated with a full course of adjuvant chemotherapy and radiotherapy.<sup>8</sup> Consideration should be given to approaches that can prolong life expectancy, but not at the expense of QoL and physical and psychological



1  
2  
3 functioning. For cancers with an extremely poor prognosis, such as glioblastoma, the  
4 extension of survival is less clinically meaningful if the patient has a decline in QoL.<sup>9</sup>  
5  
6 Researchers have also suggested that QoL be used as the main endpoint to support clinical  
7 decision-making if different cancer treatments are equally effective in terms of survival.<sup>10</sup> To  
8  
9 the best of our knowledge, a systematic review of the effects of adjuvant therapy on the QoL  
10  
11 of elderly cancer patients has not yet been published. Therefore, we undertook a systematic  
12  
13 review of the literature to summarise the evidence of global or overall QoL and other QoL  
14  
15 domains during and after adjuvant therapy in elderly patients with stage I to III solid tumours.  
16  
17  
18 The population, intervention, comparison, outcome, study design, commonly known as  
19  
20 PICOS, considered the question ‘Does the global or overall QoL during and after adjuvant  
21  
22 chemotherapy and/or radiotherapy decline, maintain or improve from baseline in elderly  
23  
24 patients with solid tumours in randomized controlled trials (RCTs) or non-RCTs?’ In this  
25  
26 review, QoL refers to the health-related QoL of elderly patients, considering the  
27  
28 corresponding global, physical, psychological and social domains as affected by the adjuvant  
29  
30 therapy.  
31  
32  
33  
34  
35  
36  
37  
38

## 39 **Methods**

### 40 Literature search strategy

41  
42 A systematic electronic search of peer-reviewed English-language articles published in  
43  
44 CINAHL plus (1937–2016), CENTRAL (1993–2016), PubMed (1996–2016), PsycINFO  
45  
46 (1967–2016) and Web of Science (1900–2016) from the inception of these databases to  
47  
48 December 2016 was conducted. The date last searched was in March 2017. Searches were  
49  
50 limited to human studies published in English. A pilot search on CINAHL was performed to  
51  
52 identify the relevant keywords contained in the title, abstract and subject descriptors. Three  
53  
54 broad categories of concepts were searched: ‘elderly’, ‘cancer’ and ‘quality of life’. The  
55  
56  
57  
58  
59  
60

1  
2  
3 search terms included (older\* OR elder\* OR geriatric OR gerontology\* OR senior OR aged)  
4  
5 AND (oncology OR cancer\* OR neoplasm\*) AND (quality of life OR QOL). The full  
6  
7 electronic search strategy is presented in Appendix A. The reference lists of the included  
8  
9 articles were also examined to identify additional eligible articles.  
10

### 11 12 13 14 Study selection

#### 15 16 *Inclusion criteria*

17  
18 We included RCTs and non-RCTs in which QoL was measured in elderly patients (65 years  
19  
20 of age or above) with stage I to III solid tumours who were undergoing adjuvant  
21  
22 chemotherapy and/or radiotherapy. Non-RCTs include quantitative studies such as  
23  
24 observational, before-and-after and longitudinal studies, in which the allocation of  
25  
26 intervention (analogy of treatment) occurs during the course of the usual treatment  
27  
28 decisions.<sup>11</sup> We required that the baseline and at least one global or overall QoL data element  
29  
30 during and/or after adjuvant chemotherapy and/or radiotherapy be collected and reported in  
31  
32 the studies so as to allow an in-context comparison of before and after adjuvant therapy.  
33  
34 Studies that covered heterogeneous age groups were included if a subgroup analysis was  
35  
36 performed and reported for those aged 65 years of age or above.  
37  
38  
39  
40  
41  
42

#### 43 44 *Exclusion criteria*

45  
46 Studies were excluded if they involved patients with haematological malignancies, distant  
47  
48 metastatic cancer or recurrent cancer without a separate analysis and report of solid tumours  
49  
50 or non-metastatic/regional metastatic cancer. We also excluded case reports, qualitative  
51  
52 studies, literature reviews, studies that evaluated surgical or procedure-related treatment and  
53  
54 presented in abstract form.  
55  
56  
57  
58  
59  
60

### *Process for selecting studies*

We screened articles obtained from keyword searching for duplicates electronically with End-Note and then manually. After duplicate removal, we assessed the remaining articles for eligibility based on titles and abstracts. We included studies in full-text screening if they were RCTs or non-RCTs, included elderly patients with stage I to III solid tumours who were undergoing adjuvant chemotherapy and/or radiotherapy, and reported QoL. We retrieved full-text articles if we considered the studies relevant and if there was insufficient information to determine eligibility. We then examined each full-text article against the inclusion and exclusion criteria of the review.

### Data extraction

We extracted data related to publication information, sample characteristics, type of cancer, type of adjuvant chemotherapy and/or radiotherapy, supportive care, QoL measurements and results, drop-outs and authors' conclusions. Functional status and co-morbidities at baseline and therapy-related adverse effects (where reported) were also extracted because of concern that they might co-vary or confound with those of adjuvant therapy to alter the change of QoL.

### Assessment of methodological quality of studies on QoL

The methodological quality of the included studies on QoL was assessed using a checklist of predefined criteria for studies on QoL.<sup>12-13</sup> The checklist was originally developed to assess the internal and external validity of prognostic studies<sup>14</sup> and was modified to assess the methodological aspects of QoL reporting in later studies.<sup>12-13</sup> The checklist covers the following 14 items: sampling (two items), selection of QoL measurement (one item), data collection process (two items), response rate (two items), group comparison (one item),

1  
2  
3 clarity of reporting (five items), and determination of prognostic factors (one item), all of  
4  
5 which are important in QoL studies. For each item, a score of 1 or 0 was given; 1 was  
6  
7 assigned to an item meeting the criteria, while 0 was assigned if an item neither met the  
8  
9 criteria nor described the related parameter sufficiently. The possible score ranged from 0 to  
10  
11 14, with scores of 10 or above, 7 to 9 and 6 or less indicating high, moderate, and low quality,  
12  
13 respectively.<sup>12</sup>

### 14 15 16 17 18 Assessment of risk of bias

19  
20 The risk of bias (RoB) of the included studies was evaluated using the Cochrane Risk of Bias  
21  
22 tool and Risk of Bias tool in Non-Randomised Studies of Interventions (ROBINS-I) for  
23  
24 RCTs and non-RCTs, respectively.<sup>11,15</sup> Both tools are domain-based evaluations of RoB with  
25  
26 respect to the internal validity of studies. The Cochrane RoB tool covers the domains of  
27  
28 selection, performance, detection, attrition and reporting bias, and other source of bias. A  
29  
30 judgement of 'yes' indicates a low risk of bias; 'no', a high risk of bias; and 'unclear' either  
31  
32 an unclear or unknown risk of bias.<sup>15</sup> The ROBINS-I tool covers seven domains: bias due to  
33  
34 confounding; bias in selection of participants into the study; bias in classification of  
35  
36 interventions; bias due to deviations from intended interventions; bias due to missing data;  
37  
38 bias in measurement of outcomes; and bias in selection of the reported result. The risk of bias  
39  
40 judgments within each domain are categorized as 'low risk' if the study is comparable to a  
41  
42 well-performed RCT, 'moderate risk' if the study is sound but cannot be considered  
43  
44 comparable to a well-performed RCT, 'serious risk' for the study has some considerable  
45  
46 problems, 'critical risk' for the study is too problematic, and 'no information'. The judgments  
47  
48 within each domain contribute to the overall risk of bias.<sup>11</sup>

1  
2  
3 In this review, two reviewers (LEYT and TDRL) independently performed literature search,  
4 eligibility assessments and study selection. The data extraction, methodological quality  
5 assessment and the RoB evaluation were conducted by CKKF and LEYT. Discrepancies and  
6 disagreements were discussed and resolved by consensus.  
7  
8  
9  
10

### 11 12 13 Data synthesis

14 Because of the variations in study design, cancer populations and QoL scales, and the  
15 insufficient data among the included studies, a meta-analysis was deemed impossible, and the  
16 results were synthesised narratively taking into account of the RoB of individual studies. In  
17 addition, we report a change in QoL scores from baseline to the middle of and to the  
18 completion of adjuvant therapy, and to the post-treatment follow-up period of individual  
19 studies where data were available. We defined '0' as no change; '↑' denotes better QoL than  
20 baseline and '↓' represents worse QoL than baseline. The effect size (ES) was also calculated  
21 for individual studies for which sufficient information was available: 0.2 to <0.5 was  
22 considered small, 0.5 to <0.8 moderate and  $\geq 0.8$  large.  
23  
24  
25  
26  
27  
28  
29  
30  
31  
32  
33  
34  
35  
36  
37  
38

## 39 **Results**

### 40 Search results

41 The initial search identified 56,935 articles, of which 440 were considered potentially  
42 relevant after checking for duplicates and title and abstract screening. After full-test  
43 assessment of the 440 articles, 18 met the eligibility criteria for inclusion in the review and  
44 analysis (Figure 1).<sup>16-33</sup> In most cases, the articles were excluded because of the lack of QoL  
45 assessment during adjuvant therapy, a separate report of participants 65 years of age or above  
46 and/or a separate report of the QoL for participants who were undergoing adjuvant therapy or  
47 suffering from non-metastatic cancer.  
48  
49  
50  
51  
52  
53  
54  
55  
56  
57  
58  
59  
60

### Description of studies

Eleven studies were published between 2000 and 2009, and seven between 2010 and 2015. With respect to the country of origin, 10 were from Europe, four from the United States, two from South Korea and one from Canada; the other was a multi-country study. As for study design, 13 studies were non-RCTs (before-and-after or longitudinal studies) that assessed the QoL of patients who were undergoing adjuvant chemotherapy,<sup>17,19,20,22,24,30,31,33</sup> radiotherapy<sup>16,32</sup> or concomitant chemotherapy and radiotherapy.<sup>26-28</sup> Four were RCTs<sup>18,21,23,25</sup>; two of these compared the effects of different chemotherapy regimens on QoL, one study compared the effects of chemotherapy and hormonal therapy against those of hormonal alone on QoL, and the other compared the effects of radiotherapy and supportive care with those of supportive care alone on QoL. One was a validation study that involved a QoL evaluation of participants who were undergoing radiotherapy with or without hormonal therapy<sup>29</sup> (Table 1).

Table 1. Characteristics of the included studies

| Study / Country                                         | Type of study                                                                | Age (years)<br>Mean ± SD                          | Sample size<br>(≥65 years cohort) | No. of participants completed baseline QoL measurement (%) | Gender (% female) | Type of cancer        | CT/RT                                                                                                                                                                                                                                                                                                                                                                                                     | Measurement of CGA domains              | Measurement of CT/RT related toxicity/adverse effect | QoL scale (score range)                           | QoL measurement time-point                                                                                                                                                           |
|---------------------------------------------------------|------------------------------------------------------------------------------|---------------------------------------------------|-----------------------------------|------------------------------------------------------------|-------------------|-----------------------|-----------------------------------------------------------------------------------------------------------------------------------------------------------------------------------------------------------------------------------------------------------------------------------------------------------------------------------------------------------------------------------------------------------|-----------------------------------------|------------------------------------------------------|---------------------------------------------------|--------------------------------------------------------------------------------------------------------------------------------------------------------------------------------------|
| Arraras et al (2008a) <sup>16</sup> , Spain             | Descriptive longitudinal                                                     | 72.3 ± 5.7 (range 65-87)                          | 48                                | 48 (100)                                                   | 100               | Breast (Stage I-III)  | RT:<br>Local<br>Locoregional<br>Regional<br><br>(no details on dosage)                                                                                                                                                                                                                                                                                                                                    | KPS<br>Co-morbidity<br>Daily activities | Selected items from NCI CTCAE                        | EORTC QLQ-C30 (0-100)^<br>EORTC QLQ-BR23 (0-100)^ | <ul style="list-style-type: none"> <li>• 1<sup>st</sup> day of RT</li> <li>• Last day of RT</li> <li>• 6 weeks after RT</li> </ul>                                                   |
| Browall et al (2008) <sup>17</sup> , Sweden             | Descriptive longitudinal                                                     | No information on mean age<br><br>(range 65-77)   | 39                                | 39 (100)                                                   | 100               | Breast (Stage I-IIIa) | FEC:<br>Fluorouracil 600 mg/m <sup>2</sup> ,<br>epirubicin 75 mg/m <sup>2</sup> ,<br>cyclophosphamide 600 mg/m <sup>2</sup><br>for 6 cycles<br><br>or<br><br>CMF:<br>Cyclophosphamide 100mg/m <sup>2</sup> ,<br>methotrexate 40 mg/m <sup>2</sup> ,<br>fluorouracil 600 mg/m <sup>2</sup> for 6 cycles<br><br>(30 women also had the CT combined with RT; a 5-week RT course starting 3-4 weeks after CT) | Co-morbidity                            | NR                                                   | EORTC QLQ-C30 (0-100)^<br>EORTC QLQ-BR23 (0-100)^ | <ul style="list-style-type: none"> <li>• Baseline</li> <li>• 1 week after 1<sup>st</sup>, 2<sup>nd</sup>, 3<sup>rd</sup> and last cycle of CT</li> <li>• 4 months post-CT</li> </ul> |
| Crivellari et al (2000) <sup>18</sup> , Multi-countries | RCT (longitudinal)<br><br>(elderly women was a subset of the original study) | No information on mean age<br><br>(age ≥65 years) | 76                                | 58 (76.3)                                                  | 100               | Breast (Grade I-III)  | Tamoxifen for 5 years<br><br>or<br><br>Tamoxifen plus 3 early courses of CMF<br><br>(cyclophosphamide 100 mg/m <sup>2</sup> , methotrexate 40 mg/m <sup>2</sup> , 5-                                                                                                                                                                                                                                      | ECOG<br>Co-morbidity                    | Modified WHO toxicity criteria                       | PACIS (0-100)^                                    | <ul style="list-style-type: none"> <li>• Baseline</li> <li>• 2 months after 1<sup>st</sup> day of adjuvant therapy then every 3 months until 24 months</li> </ul>                    |

|    |                                               |                             |                       |    |           |     |                                                                      |                                                                                                                                                                                                                                                                                                                                                                                                                                                                                                                                                                                                          |                                          |                                    |                             |                                                                                                                                                         |
|----|-----------------------------------------------|-----------------------------|-----------------------|----|-----------|-----|----------------------------------------------------------------------|----------------------------------------------------------------------------------------------------------------------------------------------------------------------------------------------------------------------------------------------------------------------------------------------------------------------------------------------------------------------------------------------------------------------------------------------------------------------------------------------------------------------------------------------------------------------------------------------------------|------------------------------------------|------------------------------------|-----------------------------|---------------------------------------------------------------------------------------------------------------------------------------------------------|
|    |                                               |                             |                       |    |           |     | fluorouracil 600 mg/m <sup>2</sup><br>every 28 days for 4<br>cycles) |                                                                                                                                                                                                                                                                                                                                                                                                                                                                                                                                                                                                          |                                          |                                    |                             |                                                                                                                                                         |
| 6  | Dees et al<br>(2000) <sup>19</sup> ,<br>USA   | Descriptive<br>longitudinal | 71.4<br>(range 65-79) | 17 | 11 (64.7) | 100 | Breast<br>(Early stage)                                              | AC:<br>Doxorubicin 60 mg/m <sup>2</sup> ,<br>cyclophosphamide 600<br>mg/m <sup>2</sup> for 4 cycles                                                                                                                                                                                                                                                                                                                                                                                                                                                                                                      | NR                                       | Myelosuppression<br>Cardiotoxicity | BCQ (0-10) <sup>^</sup>     | <ul style="list-style-type: none"> <li>• Day 1 of each cycle</li> <li>• 2 months after completing CT</li> <li>• 6 months after completing CT</li> </ul> |
| 15 | Hurria et al<br>(2006) <sup>20</sup> ,<br>USA | Descriptive<br>longitudinal | 68<br>(range 65-84)   | 49 | 49 (100)  | 100 | Breast<br>(Stage I-III)                                              | CMF:<br>Cyclophosphamide 600<br>mg/m <sup>2</sup> , methotrexate<br>40 mg/m <sup>2</sup> , 5-<br>fluorouracil 600 mg/m <sup>2</sup><br>every 3 weeks for 8<br>cycles<br><br>or<br><br>AC:<br>Doxorubicin 60 mg/m <sup>2</sup> ,<br>cyclophosphamide 600<br>mg/m <sup>2</sup> every 2 or 3<br>weeks for 4 cycles<br><br>or<br><br>ACT:<br>AC followed by<br>paclitaxel 175 mg/m <sup>2</sup><br>every 2 or 3 weeks for 4<br>cycles or AC followed<br>by paclitaxel 175 mg/m <sup>2</sup><br>weekly for 12 cycles<br><br>or<br><br>ACT-H:<br>ACT followed by<br>trastuzumab 2 mg/kg<br>weekly for 52 weeks | CCI<br>ADL<br>IADL<br>MMSE<br>GDS<br>BMI | NCI CTCAE                          | FACT-B (0-148) <sup>^</sup> | <ul style="list-style-type: none"> <li>• Prior to CT</li> <li>• Upon completion of CT</li> <li>• 6 months after CT</li> </ul>                           |



(CT regimen was at the discretion of the treating physician)

|    |                                             |                                                          |                                                                           |     |            |     |                      |                                                                                                                                                                                                                                                                                                                                                                                                                                                                                                          |                                                                                                                                           |                                                                  |                                                                                                         |                                                                                                                                                                                                                                                                                                                                          |
|----|---------------------------------------------|----------------------------------------------------------|---------------------------------------------------------------------------|-----|------------|-----|----------------------|----------------------------------------------------------------------------------------------------------------------------------------------------------------------------------------------------------------------------------------------------------------------------------------------------------------------------------------------------------------------------------------------------------------------------------------------------------------------------------------------------------|-------------------------------------------------------------------------------------------------------------------------------------------|------------------------------------------------------------------|---------------------------------------------------------------------------------------------------------|------------------------------------------------------------------------------------------------------------------------------------------------------------------------------------------------------------------------------------------------------------------------------------------------------------------------------------------|
| 7  | Kornblith et al (2011) <sup>21</sup> , USA  | RCT (longitudinal)<br><br>( <i>QoL was a sub-study</i> ) | Standard CT (CMF or AC) group 72 ± 4.6<br><br>Capecitabine group 72 ± 5.0 | 350 | 326 (93.1) | 100 | Breast (Stage I-III) | Standard CT<br>CMF:<br>Cyclophosphamide 100mg/m <sup>2</sup> from days 1 to 14, methotrexate 40 mg/m <sup>2</sup> & 5-fluorouracil 600 mg/m <sup>2</sup> on days 1 & 8 for 6 cycles<br><br>or<br><br>AC:<br>Adriamycin 60 mg/m <sup>2</sup> , cyclophosphamide 600 mg/m <sup>2</sup> on day 1 for 4 cycles<br><br>or<br><br>Test cytotoxic drug<br>Capecitabine 2000 mg/m <sup>2</sup> for 14 days; dose increased to 2500 mg/m <sup>2</sup> if no toxic effect after 1 <sup>st</sup> cycle for 6 cycles | ECOG<br>OARS (Co-morbidity)<br>HADS<br>BOMC<br>Neurobehavioral<br>Functioning & Activities of Living<br>Scale<br>Social Support<br>Survey | NCI CTCAE<br><br>Systemic adverse effects subscale of EORTC BR23 | *EORTC QLQ-C30 (0-100) <sup>^</sup><br>*EORTC BR23 (0-100) <sup>^</sup>                                 | <ul style="list-style-type: none"> <li>• Baseline</li> <li>• Mid-CT (about day 77 for CMF, day 29 for AC, day 63 for capecitabine)</li> <li>• Post-CT (6 to 7 months for CMF, 4 to 5 months for AC and capecitabine)</li> <li>• 12 months post-baseline</li> <li>• 18 months post-baseline</li> <li>• 24 months post-baseline</li> </ul> |
| 29 | Watters et al (2003) <sup>22</sup> , Canada | Descriptive longitudinal                                 | 70±5 (range 65 to 80)                                                     | 20  | 16 (80)    | 100 | Breast (Stage I-III) | Anthracycline-based adjuvant CT<br><br>Fluorouracil 500mg/m <sup>2</sup> , doxorubicin 50mg/m <sup>2</sup> , cyclophosphamide 500mg/m <sup>2</sup> at 21 days interval for 6 cycles                                                                                                                                                                                                                                                                                                                      | KPS                                                                                                                                       | NR                                                               | EORTC QLQ-C30 (0-100) <sup>^</sup><br>EORTC QLQ-BR23 (0-100) <sup>^</sup><br>SF-36 (0-100) <sup>^</sup> | <ul style="list-style-type: none"> <li>• Prior to CT</li> <li>• Before the 3<sup>rd</sup> cycle</li> <li>• Completion of CT</li> <li>• 6 months post-CT</li> </ul>                                                                                                                                                                       |
| 37 | Perrone et al (2015) <sup>23</sup> , Italy  | RCT (longitudinal)                                       | CMF: Median 71 (range 65-79)<br><br>Docetaxel: Median 71                  | 299 | 252 (84.3) | 100 | Breast (Stage I-III) | CMF:<br>Cyclophosphamide 600 mg/m <sup>2</sup> , methotrexate 40 mg/m <sup>2</sup> , fluorouracil 600 mg/m <sup>2</sup> on days 1 & 8 every 4 weeks for 4 or 6                                                                                                                                                                                                                                                                                                                                           | ECOG<br>CCI<br>ADL<br>IADL                                                                                                                | NCI CTCAE                                                        | *EORTC QLQ-C30 (0-100) <sup>^</sup><br>*EORTC QLQ-BR23 (0-100) <sup>^</sup>                             | <ul style="list-style-type: none"> <li>• Baseline</li> <li>• End of 1<sup>st</sup> CT cycle</li> <li>• End of 2<sup>nd</sup> CT cycle</li> <li>• End of 3<sup>rd</sup></li> </ul>                                                                                                                                                        |

(range 65-79)

cycles

CT cycle

or

Docetaxel 35 mg/m<sup>2</sup> on days 1, 8 & 15 every 4 weeks for 4 or 6 cycles

|   |                                                   |                                           |                                                       |    |           |      |              |                                                                                                                                                                                                                                                          |                                                   |           |                                                     |                                                                                                            |    |    |    |    |    |    |    |    |    |    |    |    |    |    |    |    |    |    |    |    |    |    |    |    |    |    |    |    |
|---|---------------------------------------------------|-------------------------------------------|-------------------------------------------------------|----|-----------|------|--------------|----------------------------------------------------------------------------------------------------------------------------------------------------------------------------------------------------------------------------------------------------------|---------------------------------------------------|-----------|-----------------------------------------------------|------------------------------------------------------------------------------------------------------------|----|----|----|----|----|----|----|----|----|----|----|----|----|----|----|----|----|----|----|----|----|----|----|----|----|----|----|----|
| 9 | 10                                                | 11                                        | 12                                                    | 13 | 14        | 15   | 16           | 17                                                                                                                                                                                                                                                       | 18                                                | 19        | 20                                                  | 21                                                                                                         | 22 | 23 | 24 | 25 | 26 | 27 | 28 | 29 | 30 | 31 | 32 | 33 | 34 | 35 | 36 | 37 | 38 | 39 | 40 | 41 | 42 | 43 | 44 | 45 | 46 | 47 | 48 | 49 |
|   | Gallego et al (2011) <sup>24</sup> , France       | Descriptive longitudinal (phase II trial) | Median 77 (range 70-87)                               | 70 | 59 (84.3) | 60   | Glioblastoma | Temozolomide (150-200 mg/m <sup>2</sup> for 5 days every 4 weeks for 12 cycles / until disease progression)<br><br>(adjusted based on toxicity)                                                                                                          | KPS (<70 as eligibility criteria)<br>MMSE         | NCI CTCAE | *EORTC QLQ-C30 (0-100)^<br>*EORTC QLQ-BN20 (0-100)^ | • Baseline<br>At least every month (restricted to the period of temozolomide period due to poor-prognosis) |    |    |    |    |    |    |    |    |    |    |    |    |    |    |    |    |    |    |    |    |    |    |    |    |    |    |    |    |
|   | Keime-Guibert et al (2007) <sup>25</sup> , France | RCT (longitudinal)                        | Supportive care + RT group<br>Median 75 (range 70-84) | 39 | 35 (89.7) | 37   | Glioblastoma | Supportive care (corticosteroids & anticonvulsant agents, physical and psychological support, management by a palliative care team) & RT (1.8 Gy given 5 days per week, total dose of 50 Gy)                                                             | KPS (≥70 as eligibility criteria)<br>MMSE         | NCI CTCAE | *EORTC QLQ-C30 (0-100)^<br>*EORTC QLQ-BN20 (0-100)^ | • Baseline<br>• Day 30<br>• Day 60<br>• Day 90<br>• Day 135                                                |    |    |    |    |    |    |    |    |    |    |    |    |    |    |    |    |    |    |    |    |    |    |    |    |    |    |    |    |
|   | Minniti et al (2009) <sup>26</sup> , Italy        | Descriptive longitudinal                  | Median 73 (range 70-79)                               | 43 | 36 (83.7) | 51.2 | Glioblastoma | Focal hypofractionated RT (total dose of 30 Gy in 6 fractions over 2 weeks) followed by adjuvant temozolomide 5 days every 28 days up to 12 cycles; 150 mg/m <sup>2</sup> for 1 <sup>st</sup> cycle and adjusted based on toxicity for subsequent cycles | KPS (≥60 as eligibility criteria)<br>Co-morbidity | NCI CTCAE | *EORTC QLQ-C30 (0-100)^                             | • Before RT<br>• After RT<br>• 2 <sup>nd</sup> , 4 <sup>th</sup> & 6 <sup>th</sup> cycles of temozolomide  |    |    |    |    |    |    |    |    |    |    |    |    |    |    |    |    |    |    |    |    |    |    |    |    |    |    |    |    |
|   | Minniti et al (2013) <sup>27</sup> , Italy        | Descriptive longitudinal (phase II trial) | Median 73 (range 70-81)                               | 71 | 65 (91.5) | 49.2 | Glioblastoma | Focal hypofractionated RT (total dose of 40 Gy in 15 fractions) plus concomitant temozolomide 75mg/m <sup>2</sup>                                                                                                                                        | KPS<br>MMSE                                       | NR        | *EORTC QLQ-C30 (0-100)^<br>*EORTC QLQ-BN20 (0-100)^ | • Before RT<br>• 4 weeks after RT (before the start of                                                     |    |    |    |    |    |    |    |    |    |    |    |    |    |    |    |    |    |    |    |    |    |    |    |    |    |    |    |    |

1  
2  
3  
4  
5  
6  
7  
8  
9  
10  
11  
12  
13  
14  
15  
16  
17  
18  
19  
20  
21  
22  
23  
24  
25  
26  
27  
28  
29  
30  
31  
32  
33  
34  
35  
36  
37  
38  
39  
40  
41  
42  
43  
44  
45  
46  
47  
48  
49

given 7 days/week followed by adjuvant temozolomide 5 days every 28 days for 12 cycles (adjuvant was started 4 weeks after the completion of RT); 150 mg/m<sup>2</sup> for 1<sup>st</sup> cycle and 200 mg/m<sup>2</sup> from 2<sup>nd</sup> cycle onwards

adjuvant temozolomide)  
• Every 8 weeks during treatment until disease progression

|                                             |                                       |                           |     |           |      |                                                                                                                                                                                                                                                                                                   |                                                                                                                                                    |     |    |                                                                                                         |                                                                       |
|---------------------------------------------|---------------------------------------|---------------------------|-----|-----------|------|---------------------------------------------------------------------------------------------------------------------------------------------------------------------------------------------------------------------------------------------------------------------------------------------------|----------------------------------------------------------------------------------------------------------------------------------------------------|-----|----|---------------------------------------------------------------------------------------------------------|-----------------------------------------------------------------------|
| Mohile et al (2011) <sup>28</sup> , USA     | Descriptive before/after              | Median 74.1 (range 65-92) | 368 | 368 (100) | 58.4 | Breast (17.1%)<br>Genitourinary (30.4%)<br>Lung (15.8%)<br>Brain and peripheral nervous system (6.5%)<br>Alimentary (10.1%)<br>Haematologic (4.9%)<br>Head and Neck (6.3%)<br>Soft tissue sarcoma (1.6%)<br>Bone and cartilaginous (1.4%)<br>Skin (3.3%)<br>Gynecologic (0.8%)<br>Melanoma (0.3%) | RT<br>Median total dose of 57.6 Gy (range 30-161)                                                                                                  | NR  | NR | M.D. Anderson Symptom Inventory^ (with an item rating of overall QOL on an 11-point horizontal scale) ^ | • Before RT<br>• During the last week of RT                           |
| Arraras et al (2008b) <sup>29</sup> , Spain | Descriptive longitudinal (validation) | 70.9 ± 5.2                | 137 | 137 (100) | 0    | Prostate (Localized)                                                                                                                                                                                                                                                                              | Lower risk:<br>RT alone (total dose of 72 Gy)<br><br>Intermediate risk:<br>Neoadjuvant and concomitant combination of an anti-androgen and an LHRH | KPS | NR | EORTC QLQ-C30 (0-100)^                                                                                  | • 1 <sup>st</sup> day of RT<br>• Last day of RT<br>• 6 weeks after RT |

For

analogue (6 months) + RT (total dose of 76 Gy)

High risk: Neoadjuvant and concomitant combination of an anti-androgen and an LHRH analogue (6 months) + RT (total dose of 76 Gy) + adjuvant LHRH analogue

|    |                                                |                                 |                                             |                                                                                                                |           |     |                      |                                                                                                                                                                                                        |                                               |                                                                                              |                                                                      |                                                                                                                                                                                           |
|----|------------------------------------------------|---------------------------------|---------------------------------------------|----------------------------------------------------------------------------------------------------------------|-----------|-----|----------------------|--------------------------------------------------------------------------------------------------------------------------------------------------------------------------------------------------------|-----------------------------------------------|----------------------------------------------------------------------------------------------|----------------------------------------------------------------------|-------------------------------------------------------------------------------------------------------------------------------------------------------------------------------------------|
| 14 | Bouvier et al (2008) <sup>30</sup> , France    | Descriptive longitudinal survey | No information on mean age (range 75 – 85+) | 11 (only 11 patients with stage III colon cancer treated with adjuvant CT and their QoL scores were reported ) | 11 (100)  | NR  | Colon                | Flurouracil<br>or<br>Oxaliplatin plus flurouracil<br>or<br>Capecitabine<br><i>(no details on dosage)</i>                                                                                               | NR                                            | NR                                                                                           | EORTC QLQ-C30 (0-100) <sup>^</sup>                                   | <ul style="list-style-type: none"> <li>• At the time of diagnosis</li> <li>• 3 months after diagnosis</li> <li>• 6 months after diagnosis</li> <li>• 12 months after diagnosis</li> </ul> |
| 29 | Chang et al (2012) <sup>31</sup> , South Korea | Descriptive longitudinal        | Median 74.5 (range 70-90)                   | 82                                                                                                             | 57 (69.5) | 64  | Colon (Stage II-III) | Capecitabine (oral, 750-1250 mg/m <sup>2</sup> , twice daily on days 1-14 every 3 weeks for 8 cycles)<br><i>(dose level was determined a/c toxicity effects during the first and preceding cycles)</i> | ECOG PS (0-2 as eligibility criteria)<br>CACI | NCI CTCAE (adequate hematologic, hepatic, and renal function status as eligibility criteria) | EORTC QLQ-C30 (0-100) <sup>^</sup>                                   | <ul style="list-style-type: none"> <li>• Baseline</li> <li>• 3 months during CT</li> <li>• 6 months during CT</li> <li>• 3-6 months after completion of CT</li> </ul>                     |
| 38 | Caffo et al (2003) <sup>32</sup> , Italy       | Descriptive longitudinal        | Median 62.5 (range 46-81)                   | 25 (no information on the breakdown)                                                                           | -         | 100 | Cervical endometrium | Post-operative external pelvic RT (median total dose of 50.4 Gy, range 45-66.6 Gy, at a dose of 1.8-2.0 Gy 5                                                                                           | NR                                            | Diarrhoea                                                                                    | Diary card (1-4) <sup>^</sup> (adapted from previous cancer setting) | Diary card: <ul style="list-style-type: none"> <li>• At the start of RT</li> <li>• Daily during RT period</li> </ul>                                                                      |

1  
2  
3  
4  
5  
6  
7  
8  
9  
10  
11  
12  
13  
14  
15  
16  
17  
18  
19  
20  
21  
22  
23  
24  
25  
26  
27  
28  
29  
30  
31  
32  
33  
34  
35  
36  
37  
38  
39  
40  
41  
42  
43  
44  
45  
46  
47  
48  
49

|                                               |                          |                         | n of sample size by age group) |          |     | times/week)                                                              |                                                                                                                                                                                                                                                                                                           |                   |           | EORTC QLQ-C30 (0-100)^                            | (reported as mean weekly scores)                                                                                                                 |
|-----------------------------------------------|--------------------------|-------------------------|--------------------------------|----------|-----|--------------------------------------------------------------------------|-----------------------------------------------------------------------------------------------------------------------------------------------------------------------------------------------------------------------------------------------------------------------------------------------------------|-------------------|-----------|---------------------------------------------------|--------------------------------------------------------------------------------------------------------------------------------------------------|
| Park et al (2013) <sup>33</sup> , South Korea | Descriptive longitudinal | Median 69 (range 65-82) | 66                             | 66 (100) | 9.1 | Non-small-cell lung carcinoma (completely resected stage Ib, II or IIIa) | NP: Cisplatin 80mg/m <sup>2</sup> on day 1, vinorelbine 25mg/m <sup>2</sup> on days 1 and 8 at 3-week interval for 4 cycles (n=30, 45.5%)<br><br>or<br><br>PC: Carboplatin, paclitaxel 175mg/m <sup>2</sup> on day 1 at 3-week interval for 4 cycles (n=36, 54.5%)<br><br>(at the physician's discretion) | ECOG Co-morbidity | NCI CTCAE | EORTC QLQ-C30 (0-100)^<br>EORTC QLQ-LC13 (0-100)^ | <ul style="list-style-type: none"> <li>• Before 1<sup>st</sup> dose of CT at each cycle</li> <li>• 1 month after 4<sup>th</sup> cycle</li> </ul> |

^Higher score indicating better quality of life; \* Quality of life is the secondary endpoint if indicated

Abbreviations:  
BCQ, Breast Cancer Chemotherapy Questionnaire; CGA, Comprehensive Geriatric Assessment; CT, chemotherapy; EORTC QLQ-C30, European Organization for Research and Treatment of Cancer QLQ-C30 general questionnaire; EORTC QLQ-BR23, European Organization for Research and Treatment of Cancer specific module for breast cancer; EORTC QLQ-BN20, European Organization for Research and Treatment of Cancer specific module for brain cancer; EORTC QLQ-LC13, European Organization for Research and Treatment of Cancer for lung-specific questionnaire; FACT-B, Functional Assessment of Cancer Therapy- Breast cancer; NR, not reported; QoL, quality of life; PACIS, Perceived adjustment to chronic illness scale; RCT, randomized controlled trial; RT, radiotherapy

1  
2  
3 The sample size of participants 65 years of age or older was reported by 17 of the 18  
4 studies<sup>16-31,33</sup>; Caffo et al. (2003) did not separately report the number of participants 65 years  
5 of age and older.<sup>32</sup> The sample size ranged from 11 to 368.<sup>16-31,33</sup> In all, these 17 studies  
6 included 1,753 participants.<sup>16-31,33</sup> Of these 1,753 participants, 1633 completed the baseline  
7 QoL questionnaire. Furthermore, the baseline completion rates ranged from 64.7 to 100%.  
8 Where reported, the age range of the participants was 65 to 92 years.<sup>16,17,19,20,22,24-28,31-33</sup>  
9 Eleven studies included participants 80 years of age and older.<sup>16,20,22,24,25,27,28,30-33</sup> As for the  
10 cancer diagnosis, eight studies included participants with breast cancer,<sup>16-23</sup> four studies  
11 focused on glioblastoma<sup>24-27</sup> and two studies considered participants were colon cancer.<sup>30-31</sup>  
12 We included one study each on mixed,<sup>28</sup> prostate,<sup>29</sup> cervical<sup>32</sup> and lung cancer<sup>33</sup> participants.  
13  
14  
15  
16  
17  
18  
19  
20  
21  
22  
23  
24  
25  
26

27 The most frequently used QoL instrument was the European Organization for Research and  
28 Treatment of Cancer general questionnaire (EORTC QLQ-C30; 13 studies).<sup>16,17,21-29,30,31,33</sup>  
29 Nine studies also used a disease-specific QoL instrument along with the EORTC QLQ-C30  
30 for breast,<sup>16,17,21-23</sup> brain<sup>24,25,27</sup> and lung<sup>33</sup> cancer populations. The follow-up QoL evaluation  
31 was conducted at various intervals during adjuvant therapy and the post-treatment period.  
32 Ten studies reported at least one QoL evaluation during adjuvant therapy,<sup>17-19,21-25,31,32</sup> and  
33 five evaluated QoL immediately after the completion of adjuvant therapy.<sup>20-22,28,29</sup> The timing  
34 of the QoL evaluation after adjuvant therapy ranged from 1 month after treatment to 24  
35 months after the first day of adjuvant therapy. Ten studies followed participants for 6 months  
36 or less after the completion of adjuvant therapy.<sup>16,17,19,20,22,25,29-31,33</sup> Two studies included a  
37 QoL evaluation of 24 months after the first day of chemotherapy.<sup>18,21</sup>  
38  
39  
40  
41  
42  
43  
44  
45  
46  
47  
48  
49  
50  
51  
52  
53

54 The geriatric domains of functional status and/or co-morbidities at baseline were examined  
55 and reported in 14 studies.<sup>16-18,20,21-27,29,31,33</sup> As shown in Table 2, two studies reported the  
56  
57  
58  
59  
60

1  
2  
3 mean of the Karnofsky Performance Scale (KPS) as 90 or above,<sup>16,29</sup> whereas three reported  
4  
5 the median of the KPS as 70 or above at baseline.<sup>25-27</sup> A KPS score of less than 70 was used  
6  
7 as a cut-off for the recruitment criterion in one study.<sup>24</sup> Co-morbid conditions were reported  
8  
9 in eight studies<sup>16,17,20,21,23,26,31,33</sup>; six of these involved participants with a limiting co-  
10  
11 morbidity or with 3 or more co-morbidities.<sup>16,17,21,23,31,33</sup> Twelve studies measured cancer  
12  
13 therapy-related toxicity during adjuvant therapy,<sup>16,18-21,23-26,31-33</sup> and nine of these used  
14  
15 National Cancer Institute's Common Terminology Criteria for Adverse Events.<sup>16,20,21,23-26,31,33</sup>  
16  
17 With respect to haematological toxicity, two studies reported grade 3 or 4 toxicity in fewer  
18  
19 than 10% of participants,<sup>18,31</sup> and five reported such toxicity in 25% or higher during adjuvant  
20  
21 chemotherapy or concomitant radiotherapy and chemotherapy.<sup>20,23,24,26,33</sup> With respect to non-  
22  
23 haematological toxicity, a study reported grade 3 or 4 toxicity in fewer than 10% of  
24  
25 participants,<sup>18</sup> and four reported such toxicity in 25% or higher during adjuvant  
26  
27 chemotherapy or concomitant radiotherapy and chemotherapy.<sup>20,23,26,31</sup> (Table 2)  
28  
29  
30  
31  
32  
33  
34  
35  
36  
37  
38  
39  
40  
41  
42  
43  
44  
45  
46  
47  
48  
49  
50  
51  
52  
53  
54  
55  
56  
57  
58  
59  
60

Table 2. Summary of the main findings of QoL

| Study         | Functional status at baseline<br><br><i>(Functional status during adjuvant therapy if reported)</i>                                                                | Co-morbid condition at baseline                 | Toxicity/Adverse effect                                                                                                 | Supportive care where reported | Global or overall QoL scores (scale range)    | Global or overall QoL scores              |                                          |                                                               |                                                                                                                                                                                                                                                                                                                                                                                                                                                                                                                                     | Findings of global or overall QoL<br><br><i>(Other QoL domains/subscales if reported)</i>                                                                                                                    | Authors' conclusions |
|---------------|--------------------------------------------------------------------------------------------------------------------------------------------------------------------|-------------------------------------------------|-------------------------------------------------------------------------------------------------------------------------|--------------------------------|-----------------------------------------------|-------------------------------------------|------------------------------------------|---------------------------------------------------------------|-------------------------------------------------------------------------------------------------------------------------------------------------------------------------------------------------------------------------------------------------------------------------------------------------------------------------------------------------------------------------------------------------------------------------------------------------------------------------------------------------------------------------------------|--------------------------------------------------------------------------------------------------------------------------------------------------------------------------------------------------------------|----------------------|
|               |                                                                                                                                                                    |                                                 |                                                                                                                         |                                |                                               | Adjuvant chemotherapy and/or radiotherapy |                                          |                                                               |                                                                                                                                                                                                                                                                                                                                                                                                                                                                                                                                     |                                                                                                                                                                                                              |                      |
|               |                                                                                                                                                                    |                                                 |                                                                                                                         |                                |                                               | Baseline                                  | In the middle                            | At the time of completion                                     | Follow-up period                                                                                                                                                                                                                                                                                                                                                                                                                                                                                                                    |                                                                                                                                                                                                              |                      |
|               |                                                                                                                                                                    |                                                 |                                                                                                                         |                                |                                               | Mean ± SD<br>No. of participants          |                                          |                                                               |                                                                                                                                                                                                                                                                                                                                                                                                                                                                                                                                     |                                                                                                                                                                                                              |                      |
| Arraras 2008a | KPS mean 94.9<br><br><i>During therapy: KPS decreased from baseline to last dose of RT (mean difference 4.7 [0-100] but returned to baseline 6 weeks after RT)</i> | Limiting co-morbidity 62.5%                     | At last day of RT: Levels 2-3 skin toxicity 8.4%<br>Level 2 dysphagia 4.2%<br>Level 2 fatigue 4.2%<br>Level 2 pain 2.1% | NR                             | Global HQoL (0 – 100)<br><br>59.5 ±12<br>n=48 | 56.4 ± 11.2<br>n=48                       | 66.5 ±14.8<br>(6 weeks after RT)<br>n=46 |                                                               | <ul style="list-style-type: none"> <li>• †Global QoL improved significantly from baseline to final evaluation</li> </ul><br>Subscales <ul style="list-style-type: none"> <li>• †Significant worsening in physical and role functioning, and fatigue, pain, and breast symptoms in last day of RT but improved at 6 weeks after RT (final evaluation)</li> </ul>                                                                                                                                                                     | <ul style="list-style-type: none"> <li>• QoL data indicates RT was well tolerated by elderly women with localized breast cancer</li> </ul>                                                                   |                      |
| Browall 2008  | NR                                                                                                                                                                 | 1 or 2 co-morbidity 61%<br>≥3 co-morbidities 3% | NR                                                                                                                      | NR                             | Global HQoL (0 – 100)<br><br>76 ± 20<br>n=39  | 60 ± 23<br>n=35                           | 61 ± 22<br>n=32                          | 70 ± 24<br>(4 months after CT & about 7 wks after RT)<br>n=30 | <ul style="list-style-type: none"> <li>• †Global QoL decreased significantly from baseline to mid-treatment and last dose of CT. The decrease in global health status had not fully recovered to baseline level at 4 months post-CT</li> </ul><br>Subscales <ul style="list-style-type: none"> <li>• †Physical, role, social and cognitive functioning decreased significantly from baseline to last dose of CT</li> <li>• The decrease in physical and role functioning had not fully recovered to baseline levels at 4</li> </ul> | <ul style="list-style-type: none"> <li>• There was a significant decrease in global QoL, body image, physical &amp; role functioning during and after CT, but the decrease was independent of age</li> </ul> |                      |



1  
2  
3  
4  
5  
6  
7  
8  
9  
10  
11  
12  
13  
14  
15  
16  
17  
18  
19  
20  
21  
22  
23  
24  
25  
26  
27  
28  
29  
30  
31  
32  
33  
34  
35  
36  
37  
38  
39  
40  
41  
42  
43  
44  
45  
46  
47  
48  
49

months post-CT

• No significant change in future perspective, emotional and sexual functioning over time

|                 |                                         |                                                                                            |                                                                                                                                                            |    |                                                                                                  |                                 |                                                                                                                            |                                                                                                                                               |                                                                                                                                                                                                                                                                                                                                         |
|-----------------|-----------------------------------------|--------------------------------------------------------------------------------------------|------------------------------------------------------------------------------------------------------------------------------------------------------------|----|--------------------------------------------------------------------------------------------------|---------------------------------|----------------------------------------------------------------------------------------------------------------------------|-----------------------------------------------------------------------------------------------------------------------------------------------|-----------------------------------------------------------------------------------------------------------------------------------------------------------------------------------------------------------------------------------------------------------------------------------------------------------------------------------------|
| Crivellari 2000 | ECOG ≤2 for participants to be eligible | No specific data reported for those 58 participants who completed baseline QoL measurement | Grade 3 haematological toxicity 9.2%<br>Other grade 3 toxicity 6.6%                                                                                        | NR | Perceived adjustment to chronic illness QoL (0 – 100)<br><br>Median 59 n=58 (CMF plus tamoxifen) | Median 68 n=55                  | Median 82 (18 months after 1 <sup>st</sup> day of CT) n=55                                                                 | • QoL improved progressively across study points (within CMF plus tamoxifen group)                                                            | • Adding CMF to tamoxifen provided little survival benefits for the older patients, and patients continued to report more effort to cope (low QoL) in the tamoxifen plus CMF group compared with the tamoxifen alone group across time<br><br>• CMF tolerability and effectiveness were reduced for elderly patients with breast cancer |
| Dees 2000       | NR                                      | NR                                                                                         | Neutropaenic complications and alteration in cardiac function were not significantly age related, no clinically significant age related trends in toxicity |    | Overall QoL (0 – 10)<br><br>7.65 ± 0.88 n=11                                                     | 6.63 ± 1.48 n=7                 | <i>(authors mentioned to collect data at 2 and 6 months after completing CT, but they did not report the results/data)</i> | • Overall QoL decreased from baseline to last dose of CT but not significant                                                                  | • There was no evidence of decline QoL in older breast cancer patients treated with adjuvant AC compared with younger ones                                                                                                                                                                                                              |
| Hurria 2006     | NR                                      | CCI mean 3                                                                                 | Grade 3 or 4 haematological toxicity 27%<br>Grade 3 or 4 non-haematological toxicity 31%                                                                   | NR | Overall HQoL (0 – 148)<br><br>116 (no information on SD) n=49                                    | 116 (no information on SD) n=49 | 119 (no information on SD) (6 months post CT) n=48                                                                         | • No significant longitudinal change in overall QoL across all time points<br><br><i>Subscales</i><br>• No significant longitudinal change in | • Despite about half of patients experiencing grade 3 or 4 toxicity, from the perspective of QoL and functional outcomes, women                                                                                                                                                                                                         |

|                |                                                                           |                                                                                                      |                                                                                                                   |    |                                                                                                                 |                                                                                     |                                                                                     |                                                                                                                                                                                                                                                                                                                                                             |                                                                                                                                                                                                                                                                                                                                                                                                                                                                                            |                                                                                                                                                                                                                                                                                                                                                 |
|----------------|---------------------------------------------------------------------------|------------------------------------------------------------------------------------------------------|-------------------------------------------------------------------------------------------------------------------|----|-----------------------------------------------------------------------------------------------------------------|-------------------------------------------------------------------------------------|-------------------------------------------------------------------------------------|-------------------------------------------------------------------------------------------------------------------------------------------------------------------------------------------------------------------------------------------------------------------------------------------------------------------------------------------------------------|--------------------------------------------------------------------------------------------------------------------------------------------------------------------------------------------------------------------------------------------------------------------------------------------------------------------------------------------------------------------------------------------------------------------------------------------------------------------------------------------|-------------------------------------------------------------------------------------------------------------------------------------------------------------------------------------------------------------------------------------------------------------------------------------------------------------------------------------------------|
|                |                                                                           |                                                                                                      |                                                                                                                   |    |                                                                                                                 |                                                                                     |                                                                                     |                                                                                                                                                                                                                                                                                                                                                             | physical, social, emotional and functional well-being across all time points                                                                                                                                                                                                                                                                                                                                                                                                               | tolerated adjuvant CT with no decline in QoL, functional status (patients maintained their baseline ability to perform ADLs & IADLs), comorbid or psychological status                                                                                                                                                                          |
| Kornblith 2011 | ECOG 0-2 for participants to be eligible<br>Grade 0-1, 96%<br>Grade 2, 4% | 0 co-morbidity 4.9%<br>1 co-morbidity 11.4%<br>2-3 co-morbidities 21.1%<br>4-10 co-morbidities 16.3% | Participants treated with capecitabine has significantly fewer adverse effects during and at the completion of CT | NR | Global QoL (0 – 100)<br><br>75.4 ± 18.3<br>n=170<br>(standard CT)<br><br>76.5 ± 18.7<br>n=156<br>(capecitabine) | 63.1 ± 18.4<br>n=150<br>(standard CT)<br><br>73.1 ± 17.6<br>n=137<br>(capecitabine) | 63.2 ± 17.3<br>n=153<br>(standard CT)<br><br>75.8 ± 17.5<br>n=136<br>(capecitabine) | 78.8 ± 17.8<br>n=141<br>(standard CT) (12 months post-CT)<br><br>77.4 ± 17.6<br>n=137<br>(standard CT) (18 months post-CT)<br><br>77.2 ± 17.6<br>n=137<br>(standard CT) (24 months post-CT)<br><br>77.3 ± 18.0<br>n=127<br>(capecitabine) (12 months post-CT)<br><br>78.2 ± 17.1<br>n=114<br>(capecitabine) (18 months post-CT)<br><br>76.5 ± 17.7<br>n=109 | <ul style="list-style-type: none"> <li>• Global QoL decreased across all time points within group but no information of p-value</li> <li>• (Participants treated with capecitabine had significantly better global QoL, role and social functioning, less fatigue, less nausea and vomiting, less constipation, and better appetite, and less psychological distress than standard CT group. This difference had resolved by 12 months with no further difference at 24 months)</li> </ul> | <ul style="list-style-type: none"> <li>• As reported in the original study, standard CT was associated with a significant improvement in relapse-free survival and overall survival compared with capecitabine</li> <li>• The short period of poorer QoL with standard CT is a modest price to pay for a chance at improved survival</li> </ul> |

|              |                                                                                                                                                |                                                                |                                                                                                                                                                                                                         |                                                                                                                                                  |                                             |                                       |                 | (capecitabine) (24 months post-CT)                                                                                                                                                                                                                                                                                                                                                               |                                                                                                                                                                                                                                                                                                                                                                                    |                                                                                                                                         |
|--------------|------------------------------------------------------------------------------------------------------------------------------------------------|----------------------------------------------------------------|-------------------------------------------------------------------------------------------------------------------------------------------------------------------------------------------------------------------------|--------------------------------------------------------------------------------------------------------------------------------------------------|---------------------------------------------|---------------------------------------|-----------------|--------------------------------------------------------------------------------------------------------------------------------------------------------------------------------------------------------------------------------------------------------------------------------------------------------------------------------------------------------------------------------------------------|------------------------------------------------------------------------------------------------------------------------------------------------------------------------------------------------------------------------------------------------------------------------------------------------------------------------------------------------------------------------------------|-----------------------------------------------------------------------------------------------------------------------------------------|
| Watters 2003 | Baseline KPS - NR<br><br><i>During therapy: KPS declined during and by the completion of CT, but did not differ from baseline at follow-up</i> | NR                                                             | NR                                                                                                                                                                                                                      | NR                                                                                                                                               | Global QoL (0 – 100)<br><br>78 ± 16<br>n=20 | 77 ± 14<br>n=20                       | 66 ± 20<br>n=20 | 73 ± 22<br>(6 months post-CT)<br>n=20                                                                                                                                                                                                                                                                                                                                                            | <ul style="list-style-type: none"> <li>†Global QoL decreased significantly from baseline to the time of completion of CT but improved at 6 months post-CT</li> </ul> <p><i>Subscales</i></p> <ul style="list-style-type: none"> <li>†Role and social functioning decreased significantly from baseline to the time of completion of CT but improved at 6 months post-CT</li> </ul> | <ul style="list-style-type: none"> <li>Selected older women tolerated anthracycline-based adjuvant CT for breast cancer well</li> </ul> |
| Perrone 2015 | ECOG Grade 0, 83%<br>Grade 1, 17%                                                                                                              | No comorbidity 60%<br>1 comorbidity 31%<br>≥2 comorbidities 8% | Severe (grade >2) haematological toxicity was suffered by 70% of participants with CMF and 9% with docetaxel, while severe non-haematological toxicity was reported in 19% participants with CMF and 28% with docetaxel | G-CSF & erythropoietin were used according to standard guidelines. G-CSF was also recommended for prophylaxis when grade ≥2 neutropenia occurred | No information on mean or median<br>n=252   | No information on mean or median      |                 | <ul style="list-style-type: none"> <li>Global QoL decreased from baseline to mid-treatment in both standard CMF and docetaxel groups but not significant</li> <li>(A statistically significant worsening with docetaxel was found for systemic therapy side-effects, future perspective, nausea &amp; vomiting, diarrhea, appetite loss, upset by hair loss &amp; body image domains)</li> </ul> | <ul style="list-style-type: none"> <li>There was no significant interaction of treatment arms &amp; geriatric scales measuring patients' ability or comorbidities</li> <li>Docetaxel is not superior to standard CMF in survival. Docetaxel worsens several QoL subscales and causes more non-haematological toxicity</li> </ul>                                                   |                                                                                                                                         |
| Gallego 2011 | Baseline: KPS <70 for participants to be eligible<br><br><i>During therapy: 33% improved their KPS by</i>                                      | NR                                                             | Grade 3 or 4 haematological toxicity 25%<br><br>Most adverse events were mild or moderate                                                                                                                               | NR                                                                                                                                               | No information on mean or median<br>n=59    | 1.4 points increase per month<br>n=35 |                 | <ul style="list-style-type: none"> <li>†Global QoL improved significantly over time</li> </ul> <p><i>Subscales</i></p> <ul style="list-style-type: none"> <li>†Physical, role, cognitive and social functioning scores improved significantly over time</li> </ul>                                                                                                                               | <ul style="list-style-type: none"> <li>Temozolomide was generally well tolerated</li> <li>Temozolomide appears to increase survival, and is associated with a</li> </ul>                                                                                                                                                                                                           |                                                                                                                                         |

|                    |                                                                                                                                                                       |                                                                                                             |                                                                                                                                                                                                                                                                              |                                                                                                                     |                                                                                          |                                        |                                                 |                                                                                                                                                                                                                                                                                                                                                                                                                                                               |                                                                                                                                                                                                                                                                                                                                                               |                                                                               |
|--------------------|-----------------------------------------------------------------------------------------------------------------------------------------------------------------------|-------------------------------------------------------------------------------------------------------------|------------------------------------------------------------------------------------------------------------------------------------------------------------------------------------------------------------------------------------------------------------------------------|---------------------------------------------------------------------------------------------------------------------|------------------------------------------------------------------------------------------|----------------------------------------|-------------------------------------------------|---------------------------------------------------------------------------------------------------------------------------------------------------------------------------------------------------------------------------------------------------------------------------------------------------------------------------------------------------------------------------------------------------------------------------------------------------------------|---------------------------------------------------------------------------------------------------------------------------------------------------------------------------------------------------------------------------------------------------------------------------------------------------------------------------------------------------------------|-------------------------------------------------------------------------------|
|                    | $\geq 10$ , before disease progression                                                                                                                                |                                                                                                             | According to MMSE, Patient's cognitive function improved over time                                                                                                                                                                                                           |                                                                                                                     |                                                                                          |                                        |                                                 |                                                                                                                                                                                                                                                                                                                                                                                                                                                               | <ul style="list-style-type: none"> <li>For QLQ-BN20, scores on motor dysfunction, drowsiness, and bladder control improved over time before disease progression</li> </ul>                                                                                                                                                                                    | significant improvement of QoL and functional status before tumor progression |
| Keime-Guibert 2007 | <p>Baseline KPS <math>\geq 70</math> for participants to be eligible</p> <p><i>During therapy: KPS declined over time</i></p>                                         | NR                                                                                                          | No severe adverse effects related to RT                                                                                                                                                                                                                                      | Corticosteroids and anticonvulsant agents, physical and psychological support, management by a palliative care team | <p>Global QoL (0 – 100)</p> <p>62.9 <math>\pm</math> 3.4 n=35 (supportive care + RT)</p> | 55.6 $\pm$ 3.9 n=NR                    | 58.8 $\pm$ 4.5 (~3 months post-RT) n=26         | <ul style="list-style-type: none"> <li>Global QoL did not deteriorate significantly over time (supportive care + RT)</li> </ul> <p><i>Subscales</i></p> <ul style="list-style-type: none"> <li>†During and after treatment, scores were significantly worse over time on physical, cognitive and social functioning, and fatigue and motor dysfunction</li> </ul>                                                                                             | <ul style="list-style-type: none"> <li>Supportive care + RT was superior to supportive alone in survival benefit. Global assessment of deterioration of QoL over time did not differ significantly between supportive care + RT group and supportive care group alone</li> <li>RT results in a modest improvement in survival without reducing QoL</li> </ul> |                                                                               |
| Minniti 2009       | <p>Baseline: KPS <math>\geq 60</math> for participants to be eligible</p> <p>KPS median 70</p> <p><i>KPS did not change significantly during the study period</i></p> | <p>Diabetes 19% out of 43</p> <p>Hypertension 33% out of 43</p> <p>Cardiovascular disease 16% out of 43</p> | <p>Grade 2-3 confusion and/or somnolence during or after RT</p> <p>14% out of 43</p> <p>Grade 3-4 haematological during CT 28% out of 43 (which led to the early discontinuation of CT in half of participants)</p> <p>Moderate-severe fatigue 35% out of 43, nausea 10%</p> | Anticonvulsants and dexamethasone                                                                                   | <p>Global QoL (0 – 100)</p> <p>58.3 <math>\pm</math> 3.7 n=36</p>                        | 54.3 $\pm$ 5.1 (completion of RT) n=36 | 57.9 $\pm$ 6.8 (mid-CT; RT followed by CT) n=36 | <ul style="list-style-type: none"> <li>Score of global health status did not change significantly</li> </ul> <p><i>Subscales</i></p> <ul style="list-style-type: none"> <li>During treatment, scores of functioning subscale, nausea and vomiting, and insomnia did not change significantly</li> <li>Fatigue and constipation scales worsened slightly from baseline through treatment</li> <li>†Scores of physical, role and social functioning,</li> </ul> | <ul style="list-style-type: none"> <li>Temozolomide is well tolerated.</li> <li>The association of hypofractionated RT and temozolomide had no negative effect on QoL</li> <li>A short course of RT followed by temozolomide may provide survival benefit while maintaining QoL</li> </ul>                                                                    |                                                                               |

1  
2  
3  
4  
5  
6  
7  
8  
9  
10  
11  
12  
13  
14  
15  
16  
17  
18  
19  
20  
21  
22  
23  
24  
25  
26  
27  
28  
29  
30  
31  
32  
33  
34  
35  
36  
37  
38  
39  
40  
41  
42  
43  
44  
45  
46  
47  
48  
49

|               |                                                          |    |    |    |                                                                  |                                                                                        |                                                                       |  |                                                                                                                                                                                                                                                                                                                                                                                                                                                                                               |                                                                                                                                                                                                                                                                  |
|---------------|----------------------------------------------------------|----|----|----|------------------------------------------------------------------|----------------------------------------------------------------------------------------|-----------------------------------------------------------------------|--|-----------------------------------------------------------------------------------------------------------------------------------------------------------------------------------------------------------------------------------------------------------------------------------------------------------------------------------------------------------------------------------------------------------------------------------------------------------------------------------------------|------------------------------------------------------------------------------------------------------------------------------------------------------------------------------------------------------------------------------------------------------------------|
|               |                                                          |    |    |    | out of 43, constipation 22% out of 43, skin rash 9% out of 43    |                                                                                        |                                                                       |  | and fatigue deteriorated significantly between baseline and the 2 <sup>nd</sup> follow up                                                                                                                                                                                                                                                                                                                                                                                                     |                                                                                                                                                                                                                                                                  |
| Minniti 2013  | KPS ≥60 for participants to be eligible<br>KPS median 70 | NR | NR | NR | Global QoL (0 – 100)<br><br>61.5 ± 20.8<br>n=65                  | 60.0 (no information on SD)<br>(1 month after RT and concomitant temozolomide)<br>n=53 | 72.0 (no information on SD)<br>(6 month from the start of RT)<br>n=27 |  | <ul style="list-style-type: none"> <li>• †Global QoL improved significantly between baseline and 6-month from the start of RT (in the midst of adjuvant temozolomide)</li> </ul> <p><i>Subscales</i></p> <ul style="list-style-type: none"> <li>• †Social and cognitive functioning improved significantly between baseline and 6-month from the start of RT p</li> <li>• †Fatigue worsened significantly between baseline and 4-month follow up</li> </ul>                                   | <ul style="list-style-type: none"> <li>• A short course of RT in combination with temozolomide was associated with survival benefit (median survival and 1-year survival rates of 12.4 months and 58%, respectively) without a negative effect on QoL</li> </ul> |
| Mohile 2011   | NR                                                       | NR | NR | NR | Overall QoL (0 – 10)<br><br>2.07 (no information on SD)<br>n=368 | 2.37 (no information on SD)<br>n=368                                                   |                                                                       |  | <ul style="list-style-type: none"> <li>• There was an increase of QoL score after RT, however, no information about the p value</li> <li>• Prevalence and severity of symptoms interfered with QoL increased insignificantly from pre- to post-RT</li> </ul> <p><i>Subscales</i></p> <ul style="list-style-type: none"> <li>• †The prevalence of memory difficulties and sleep disturbance, and the severity of fatigue and distress significantly increased over the course of RT</li> </ul> | <ul style="list-style-type: none"> <li>• Symptoms interfered with QoL after RT</li> <li>• There were no differences in the change in total symptom burden and interference with QoL between older and younger patients during RT</li> </ul>                      |
| Arraras 2008b | KPS mean 96.1                                            | NR | NR | NR | Global QoL (0 – 100)<br><br>66.8 ± 17.9                          | 66.7 ± 20.9<br>n=132                                                                   | 71.3 ± 18.6<br>(1.5 months after completion)                          |  | <ul style="list-style-type: none"> <li>• No change in global QoL score from baseline to last dose of RT but significantly improved</li> </ul>                                                                                                                                                                                                                                                                                                                                                 | <ul style="list-style-type: none"> <li>• There was a tendency to a worsening of QoL at the end of the</li> </ul>                                                                                                                                                 |

n=137

of RT)  
n=126

from last dose to 1.5  
months after RT

treatment, with a  
recovery in most  
scales in the  
follow-up  
measurement that  
could be due to RT  
low toxicity level

*Subscales*

- †There was a significant worsening of physical, cognitive and social functioning from baseline to last dose of RT, but physical functioning improved significantly from last dose to 1.5 months after RT

|              |                                                                                                   |                                                                        |                                                                                                                      |    |                                                               |                                          |                                                                                 |                                                                                                                                                                                                                                                                                                                                                                                                                           |                                                                                                                                                                                                             |
|--------------|---------------------------------------------------------------------------------------------------|------------------------------------------------------------------------|----------------------------------------------------------------------------------------------------------------------|----|---------------------------------------------------------------|------------------------------------------|---------------------------------------------------------------------------------|---------------------------------------------------------------------------------------------------------------------------------------------------------------------------------------------------------------------------------------------------------------------------------------------------------------------------------------------------------------------------------------------------------------------------|-------------------------------------------------------------------------------------------------------------------------------------------------------------------------------------------------------------|
| Bouvier 2008 | NR                                                                                                | NR                                                                     | NR                                                                                                                   | NR | Global QoL (0 – 100)<br><br>60 (no information of SD)<br>n=11 | No information on mean or median         | No information on mean or median                                                | • Graph shows the mean scores of global QoL increased over time, but no information about the <i>p</i> value<br><br><i>Subscales</i><br>• †The overall mean score for physical functioning was significantly higher for participants treated with CT than untreated patients regardless of follow-up period. Emotional functioning were found to significantly increase between at diagnosis and 6 months after diagnosis | • Global QoL for patients with stage III colon cancer treated with adjuvant CT did not vary significantly from that of patients who did not receive CT across time                                          |
| Chang 2012   | ECOG<br>Grade 0, 4.9%<br>Grade 1, 63.4%<br>Grade 2, 31.7%<br>(data for the original sample of 82) | CACI<br>≤7, 75.6%<br>≥8, 24.4%<br>(data for the original sample of 82) | Grade 3 or 4 haematological toxicity <1%<br>Grade 3 hand-foot syndrome 25.6%<br>(data for the original sample of 82) | NR | Global QoL (0 – 100)<br><br>59 (no information of SD)<br>n=57 | No information on mean or median<br>n=55 | No information on mean or median<br>(3-6 months after completion of CT)<br>n=48 | • No significant worsening of global QoL during CT<br><br><i>Subscales</i><br>• No significant worsening of functional QoL during CT<br><br>• A slight and insignificant deterioration in social and cognitive functioning at 3 months during CT but recovered over time                                                                                                                                                  | • By using a tailored-dose escalation strategy, unnecessary dose reduction could be avoided without an increment of toxic effects in patients receiving capecitabine. The toxicity profiles were favorable. |

1  
2  
3  
4  
5  
6  
7  
8  
9  
10  
11  
12  
13  
14  
15  
16  
17  
18  
19  
20  
21  
22  
23  
24  
25  
26  
27  
28  
29  
30  
31  
32  
33  
34  
35  
36  
37  
38  
39  
40  
41  
42  
43  
44  
45  
46  
47  
48  
49

• No symptoms were significantly exacerbated during therapy

Compromised QoL after surgery was not worsened by adjuvant capecitabine and improved after the completion of CT

|            |                                          |                                                       |                                                                           |                                                                                                                                                                                 |                                                                         |                                                                              |                                                                              |                                                                                                                                                               |                                                                               |
|------------|------------------------------------------|-------------------------------------------------------|---------------------------------------------------------------------------|---------------------------------------------------------------------------------------------------------------------------------------------------------------------------------|-------------------------------------------------------------------------|------------------------------------------------------------------------------|------------------------------------------------------------------------------|---------------------------------------------------------------------------------------------------------------------------------------------------------------|-------------------------------------------------------------------------------|
| Caffo 2003 | NR                                       | NR                                                    | The mean no. of daily stools progressively increased during the treatment | Participants experiencing grade 3-4 diarrhea were given loperamide with adequate water and saline support. If loperamide was ineffective, treatment with octreotide was planned | Overall QoL (Daily card) (1 – 4)<br><i>(No data reported for EORTC)</i> | 2.46 ± 0.67<br>n was not reported                                            | 2.55 ± 1.05<br>n was not reported                                            | • Global QoL score improved progressively across study points, and from baseline to final evaluation (during RT), but no information about the <i>p</i> value | • The authors' conclusion is not related to QoL                               |
| Park 2013  | ECOG 0-1 for participants to be eligible | 0 co-morbidity 71.2%<br>Any comorbid conditions 28.8% | Grade 3 neutropaenia 39.4%, anaemia 4.5%, thrombocytopaenia 1.5%          | NR                                                                                                                                                                              | Global QoL (0 – 100)<br><br>53 (no information of SD)<br>n=66           | No information on mean or median (after 2 <sup>nd</sup> cycle of CT)<br>n=63 | No information on mean or median (after 4 <sup>th</sup> cycle of CT)<br>n=60 | • Global QoL did not significantly deteriorate over time                                                                                                      | • Postoperative CT did not substantially reduce QoL in elderly NSCLC patients |

† Significant difference reported by the study authors (*p* < 0.05)

ADLs, Activities of Daily Living; BMI, Body Mass Index; BOMC, Blessed Orientation-Memory-Concentration test; CACI, Charlson-Age Comorbidity Index; CCI, Charlson Comorbidity Index; CT, chemotherapy; ECOG, Eastern Cooperative Oncology Group; GDS, Geriatric Depression Scale; IADLs, Instrumental Activities of Daily Living; MMSE, Mini-Mental State Examination; KPS, Karnofsky Performance Status Scale; NCI CTC, National Cancer Institute Common Toxicity Criteria; NR, not reported; OARS, Older American Resources and Services Questionnaire; RT, radiotherapy

### Methodological quality

Thirteen studies attained scores of 10 or higher (high quality),<sup>16-27,33</sup> three scored 7 to 9 (moderate quality),<sup>28,30,31</sup> and two scored 6 or lower (low quality).<sup>29,32</sup> The main methodological drawbacks were the lack of determination of prognostic factors for QoL (100%), and the lack of data on time since diagnosis or treatment (77.8%) and characteristics of non-responders (77.8%). (Table 3)



Table 3. Results of the methodological quality assessment

| Studies            | Sampling                                      |   | Selection of QoL instrument                                                    |   | Data collection process |                                                                                                                                   | Response rate |   | Group comparison |                            | Clarity of reporting |                                           |                                           | Determination of prognostic factor QoL | Quality score |
|--------------------|-----------------------------------------------|---|--------------------------------------------------------------------------------|---|-------------------------|-----------------------------------------------------------------------------------------------------------------------------------|---------------|---|------------------|----------------------------|----------------------|-------------------------------------------|-------------------------------------------|----------------------------------------|---------------|
|                    | B                                             | O | I                                                                              | C | M                       | G                                                                                                                                 | H             | E | A                | D                          | F                    | J                                         | K                                         | L                                      |               |
| Arraras 2008a      | 1                                             | 1 | 1                                                                              | 1 | 1                       | 1                                                                                                                                 | 0             | 1 | 1                | 1                          | 0                    | 1                                         | 1                                         | 0                                      | 11            |
| Rowell 2008        | 1                                             | 1 | 1                                                                              | 1 | 1                       | 1                                                                                                                                 | 1             | 1 | 1                | 1                          | 0                    | 1                                         | 1                                         | 0                                      | 12            |
| Crivellari 2000    | 1                                             | 1 | 0                                                                              | 1 | 1                       | 1                                                                                                                                 | 0             | 1 | 1                | 1                          | 0                    | 1                                         | 1                                         | 0                                      | 10            |
|                    |                                               |   | (PACIS)                                                                        |   |                         |                                                                                                                                   |               |   |                  |                            |                      |                                           |                                           |                                        |               |
| Dees 2000          | 1                                             | 1 | 1                                                                              | 1 | 1                       | 1                                                                                                                                 | 0             | 1 | 1                | 1                          | 0                    | 0                                         | 1                                         | 0                                      | 10            |
| Curria 2006        | 1                                             | 1 | 1                                                                              | 1 | 1                       | 1                                                                                                                                 | 0             | 1 | 1                | 1                          | 1                    | 1                                         | 1                                         | 0                                      | 12            |
| Kornblith 2011     | 1                                             | 1 | 1                                                                              | 1 | 1                       | 1                                                                                                                                 | 0             | 1 | 1                | 1                          | 0                    | 0                                         | 1                                         | 0                                      | 10            |
| Watters 2003       | 1                                             | 1 | 1                                                                              | 1 | 1                       | 1                                                                                                                                 | 0             | 1 | 1                | 1                          | 0                    | 1                                         | 1                                         | 0                                      | 11            |
| Serrone 2015       | 1                                             | 1 | 1                                                                              | 1 | 1                       | 1                                                                                                                                 | 1             | 1 | 1                | 1                          | 0                    | 1                                         | 0                                         | 0                                      | 11            |
| Gallego 2011       | 1                                             | 1 | 1                                                                              | 1 | 1                       | 1                                                                                                                                 | 0             | 1 | 1                | 1                          | 1                    | 1                                         | 0                                         | 0                                      | 11            |
| Keime-Guibert 2007 | 1                                             | 1 | 1                                                                              | 0 | 1                       | 1                                                                                                                                 | 0             | 1 | 1                | 1                          | 1                    | 1                                         | 1                                         | 0                                      | 11            |
| Minniti 2009       | 1                                             | 1 | 1                                                                              | 1 | 1                       | 1                                                                                                                                 | 0             | 1 | 1                | 1                          | 1                    | 1                                         | 1                                         | 0                                      | 12            |
| Minniti 2013       | 1                                             | 1 | 1                                                                              | 1 | 1                       | 1                                                                                                                                 | 1             | 1 | 1                | 1                          | 0                    | 1                                         | 1                                         | 0                                      | 12            |
| Mohile 2011        | 1                                             | 1 | 0                                                                              | 1 | 0                       | 1                                                                                                                                 | 0             | 1 | 1                | 1                          | 0                    | 0                                         | 1                                         | 0                                      | 8             |
|                    |                                               |   | (MD Anderson Symptom Inventory)                                                |   |                         |                                                                                                                                   |               |   |                  |                            |                      |                                           |                                           |                                        |               |
| Arraras 2008b      | 0                                             | 1 | 1                                                                              | 0 | 0                       | 1                                                                                                                                 | 0             | 1 | 0                | 0                          | 0                    | 1                                         | 1                                         | 0                                      | 6             |
| Bouvier 2008       | 0                                             | 1 | 1                                                                              | 1 | 0                       | 0                                                                                                                                 | 0             | 1 | 1                | 0                          | 0                    | 1                                         | 1                                         | 0                                      | 8             |
|                    | (only age and cancer diagnosis were reported) |   |                                                                                |   |                         | (only among 30 respondents undergoing curative surgical resection for stage III cancer with 11 received adjuvant CT was reported) |               |   |                  | (no information on dosage) |                      | (only graphical information was reported) | (only graphical information was reported) |                                        |               |
| Chang 2012         | 1                                             | 1 | 1                                                                              | 1 | 0                       | 1                                                                                                                                 | 0             | 1 | 1                | 1                          | 0                    | 1                                         | 0                                         | 0                                      | 9             |
| Carro 2003         | 0                                             | 0 | 0                                                                              | 1 | 1                       | 1                                                                                                                                 | 0             | 1 | 0                | 1                          | 0                    | 0                                         | 1                                         | 0                                      | 6             |
|                    |                                               |   | (both diary care and EORTC-QLQ C30 were used but only diary data was reported) |   |                         |                                                                                                                                   |               |   |                  |                            |                      |                                           |                                           |                                        |               |
| Clark 2013         | 1                                             | 1 | 1                                                                              | 1 | 1                       | 1                                                                                                                                 | 0             | 1 | 1                | 1                          | 0                    | 1                                         | 1                                         | 0                                      | 11            |
|                    |                                               |   |                                                                                |   |                         |                                                                                                                                   |               |   |                  |                            |                      | (only)                                    | (only)                                    |                                        |               |

graphical  
information  
was reported)

graphical  
information  
was  
reported)

A= Socio-demographic and medical data is described (e.g. age, race, employment status, educational status, tumour stage at diagnosis etc.); B= Inclusion and/or exclusion criteria are formulated; C= The process of data collection is described (e.g., interview or self-report etc.); D= The type of cancer treatment is described; E= The results are compared between two groups or more (e.g., healthy population, groups with different cancer treatment or age, comparison with time at diagnosis etc.); F= Mean or median and range or standard deviation of time since diagnosis or treatment is given; G= Participation and response rates for patient groups have to be described and have to be more than 75%; H= Information is presented about patient/ disease characteristics of responders and non-responders or if there is no selective response; I= A standardized or valid quality of life questionnaire is used; J= Results are not only described for quality of life but also for the physical, psychological and social domain; K= Mean, median, standard deviations or percentages are reported for the most important outcome measures (HQoL); L= An attempt is made to find a set of determinants with the highest prognostic value (HQoL); M= Patient signed an informed consent form before study participation; N=No; O= The degree of selection of the patient sample is described

For peer review only

### Risk of bias

#### *RCTs*

In all four RCTs, the risk of bias was low or unclear for most items but high for detection because of the subjective and self-reporting nature of the QoL assessment. One RCT did not blind the participants and staff and thus was judged to have a high risk of performance bias.<sup>18</sup> The remaining three RCTs did not report information on blinding of participants and personnel to allow for a judgement of the performance bias.<sup>21,23,25</sup> We judged three RCTs to have an unclear risk of attrition bias because of the lack of explicit information on lost to follow-up and missing data.<sup>18,21,25</sup> (Figure 2)

INSERT FIGURE 2 HERE

#### *Non-RCTs*

Of the 14 non-RCTs, five studies were judged to have a low or moderate risk of bias for all domains,<sup>16,20,26,31,33</sup> and the other nine studies had a serious risk of bias in at least one domain.<sup>17,19,22,24,28-30,32</sup> The bias were observed mainly in the confounding, in the selection of participants for the study and in the measurement of outcomes. Although most of the studies measured some confounding variables (e.g., functional performance status or co-morbidity) at baseline, no stratification in the study design or adjustment in the data analysis was made to control their effects.<sup>16,17,20, 22-24,27,29,31,33</sup> Four non-RCTs did not measure functional performance status or co-morbidities at baseline.<sup>19,28,30,32</sup> The bias in the selection of participants was either moderate or serious in all the non-RCTs.<sup>16,17,19,20,22-24,27-33</sup> Only fit and functional elderly patients seemed to have been enrolled in these studies, and hence, the study cohorts might not be representative of the real world population. Like the RCTs, all 14 non-RCTs had a moderate-to-serious risk of bias in the measurement outcomes because of the

1  
2  
3 subjective and self-reporting nature of the QoL assessment. The bias in the selection of  
4  
5 reported results was unclear in all the non-RCTs because of unavailability of study protocols.  
6

7 16,17,19,20,22-24,27-33 (Table 4)  
8  
9  
10  
11  
12  
13  
14  
15  
16  
17  
18  
19  
20  
21  
22  
23  
24  
25  
26  
27  
28  
29  
30  
31  
32  
33  
34  
35  
36  
37  
38  
39  
40  
41  
42  
43  
44  
45  
46  
47  
48  
49  
50  
51  
52  
53  
54  
55  
56  
57  
58  
59  
60

For peer review only

Table 4. Risk of bias summary for Non-RCTs (ROBINS-I)

| Studies       | Pre-intervention        |                                                  | At intervention                         |                                                    | Post-intervention        |                                 |                                          | Overall risk of bias                         |
|---------------|-------------------------|--------------------------------------------------|-----------------------------------------|----------------------------------------------------|--------------------------|---------------------------------|------------------------------------------|----------------------------------------------|
|               | Bias due to confounding | Bias in selection of participants into the study | Bias in classification of interventions | Bias due to deviations from intended interventions | Bias due to missing data | Bias in measurement of outcomes | Bias in selection of the reported result |                                              |
| Arraras 2008a | M                       | M                                                | M                                       | M                                                  | M                        | M                               | unclear                                  | Low or moderate risk if bias for all domains |
| Browall 2008  | M                       | M                                                | M                                       | S                                                  | M                        | M                               | unclear                                  | Serious risk of bias in at least one domain  |
| Dees 2000     | S                       | S                                                | L                                       | M                                                  | M                        | M                               | unclear                                  | Serious risk of bias in at least one domain  |
| Hurria 2006   | M                       | M                                                | L                                       | M                                                  | L                        | M                               | unclear                                  | Low or moderate risk if bias for all domains |
| Watters 2003  | S                       | M                                                | L                                       | M                                                  | L                        | M                               | unclear                                  | Serious risk of bias in at least one domain  |
| Gallego 2011  | M                       | M                                                | L                                       | M                                                  | S                        | S                               | unclear                                  | Serious risk of bias in at least one domain  |
| Minniti 2009  | M                       | M                                                | L                                       | M                                                  | L                        | M                               | unclear                                  | Low or moderate risk if bias for all domains |
| Minniti 2013  | M                       | M                                                | L                                       | M                                                  | S                        | M                               | unclear                                  | Serious risk of bias in at least one domain  |
| Mohile 2011   | S                       | M                                                | M                                       | unclear                                            | L                        | M                               | unclear                                  | Serious risk of bias in at least one domain  |
| Arraras 2008b | M                       | S                                                | unclear                                 | unclear                                            | M                        | M                               | unclear                                  | Serious risk of bias in at least one domain  |
| Bouvier 2008  | S                       | M                                                | unclear                                 | unclear                                            | L                        | M                               | unclear                                  | Serious risk of bias in at least one domain  |
| Chang 2012    | M                       | M                                                | L                                       | M                                                  | M                        | M                               | unclear                                  | Low or moderate risk if bias for all domains |
| Caffo 2003    | S                       | S                                                | L                                       | unclear                                            | M                        | M                               | unclear                                  | Serious risk of bias in at least one domain  |
| Park 2013     | M                       | M                                                | M                                       | M                                                  | M                        | M                               | unclear                                  | Low or moderate risk if bias for all domains |

L=low risk; M=moderate risk; S=serious risk; C=critical risk

1  
2  
3 QoL outcomes

4  
5 Breast cancer

6  
7 *EORTC QLQ-C30*

8  
9  
10 Three studies reported the global QoL scores at baseline, during chemotherapy, at the time of  
11 completion of chemotherapy and 4 to 12 months after the completion of chemotherapy.<sup>17,21,22</sup>

12  
13  
14 The participants in these studies were treated with the standard chemotherapy regimen for  
15 breast cancer, including an anthracycline-based, cyclophosphamide/ methotrexate/ fluorouracil  
16 (CMF) or fluorouracil/ epirubicin/ cyclophosphamide regimen. In Kornblith et al. (2011),<sup>21</sup>  
17 approximately half of the participants received capecitabine. Browall et al. (2008) reported  
18 statistically significantly lower global QoL scores during (ES, 0.74) and immediately after the  
19 completion of chemotherapy (ES, 0.71) than at baseline and a non-significant decline in the  
20 global QoL score 4 months after chemotherapy.<sup>17</sup> Watters et al. (2003) also revealed a  
21 statistically significantly lower global QoL score immediately after the completion of  
22 chemotherapy (ES, 0.66) than at baseline and a non-significant decline in the global QoL  
23 scores during and 6 months after chemotherapy.<sup>22</sup> Browall et al. (2008) and Watters et al.  
24 (2003) also reported the domain scores, wherein statistically significantly lower scores in the  
25 role and social functioning domains were found immediately after the completion of  
26 chemotherapy than at baseline. No significant reductions in role and social well-being were  
27 reported during or 4 to 6 months after the completion of chemotherapy.<sup>17,22</sup> Emotion was the  
28 only domain that showed an improvement from baseline to the follow-up evaluations, with a  
29 statistically significant higher score during chemotherapy. The domains of physical and  
30 cognitive functioning revealed no statistically significant differences across time.<sup>17,22</sup> In  
31 Kornblith et al. (2011), both standard chemotherapy and capecitabine groups showed a  
32 decline in the global QoL during and immediately after the completion of chemotherapy,  
33  
34  
35  
36  
37  
38  
39  
40  
41  
42  
43  
44  
45  
46  
47  
48  
49  
50  
51  
52  
53  
54  
55  
56  
57  
58  
59  
60

1  
2  
3  
4  
5  
6  
7  
8  
9  
10  
11  
12  
13  
14  
15  
16  
17  
18  
19  
20  
21  
22  
23  
24  
25  
26  
27  
28  
29  
30  
31  
32  
33  
34  
35  
36  
37  
38  
39  
40  
41  
42  
43  
44  
45  
46  
47  
48  
49  
50  
51  
52  
53  
54  
55  
56  
57  
58  
59  
60

whereas an increase in the global QoL was reported from baseline to 12 months after the completion of chemotherapy.<sup>21</sup> (Tables 2 and 5)

For peer review only

Table 5. Matrix of baseline and change of QoL scores, attrition rate, methodological quality score, and RoB

| <b>Type of cancer</b><br>Studies | QoL scale | Baseline                                         | From baseline to the middle of adjuvant CT/or RT  | From baseline to the time of completion of adjuvant CT/or RT | From baseline to post adjuvant CT/or RT follow-up period | Attrition (last follow-up) where reported (%) | Methodological quality | Overall risk of bias judgment for non-RCTs |
|----------------------------------|-----------|--------------------------------------------------|---------------------------------------------------|--------------------------------------------------------------|----------------------------------------------------------|-----------------------------------------------|------------------------|--------------------------------------------|
| <b>Breast RCTs</b>               |           |                                                  |                                                   |                                                              |                                                          |                                               |                        |                                            |
| Kornblith 2011                   | EORTC     | Standard CT<br>75.4                              | ↓<br>(no information on <i>p</i> value)           | ↓<br>(no information on <i>p</i> value)                      | ↑<br>(no information on <i>p</i> value)                  | 17                                            | 10                     | (refer to RoB summary)                     |
|                                  |           | Capecitabine<br>76.5                             | ↓<br>(no information on <i>p</i> value)           | ↓<br>(no information on <i>p</i> value)                      | ↑<br>(no information on <i>p</i> value)                  | 18.6                                          |                        |                                            |
| Perrone 2015                     | EORTC     | Standard CT<br>(mean or median was not reported) | ↓<br>(narrative; mean or median was not reported) |                                                              |                                                          | No information                                | 11                     | (refer to RoB summary)                     |
|                                  |           | Docetaxel<br>(mean or median was not reported)   | ↓<br>(narrative; mean or median was not reported) |                                                              |                                                          |                                               |                        |                                            |
| Crivellari 2000                  | PACIS     | Median 59                                        | ↑<br>(no information on <i>p</i> value)           |                                                              |                                                          | 5.2                                           | 10                     | (refer to RoB summary)                     |
|                                  |           |                                                  |                                                   |                                                              |                                                          |                                               |                        |                                            |
| <b>Non-RCTs</b>                  |           |                                                  |                                                   |                                                              |                                                          |                                               |                        |                                            |
| Arraras 2008                     | EORTC     | 59.5                                             |                                                   |                                                              | ↑↑<br>ES 0.52                                            | 4.2                                           | 11                     | low or moderate                            |
| Browall 2008                     | EORTC     | 76                                               |                                                   |                                                              | ↓↑<br>ES 0.74                                            | ↓↑<br>ES 0.71                                 | (an improving trend)   | 23.1                                       |
| Dees 2000                        | BCQ       | 7.65 on the scale of 0-10                        |                                                   |                                                              | ↓                                                        | 36.4                                          | 10                     | serious                                    |
| Hurria 2006                      | FACT-B    | 116 on the scale of 0-148                        |                                                   |                                                              | 0                                                        | ↑                                             | 2                      | 12                                         |
| Watters 2003                     | EORTC     | 78                                               | ↓                                                 | ↓↑<br>ES 0.66                                                | ↓<br>(an improving trend)                                | 0                                             | 11                     | serious                                    |
| <b>Glioblastoma RCT</b>          |           |                                                  |                                                   |                                                              |                                                          |                                               |                        |                                            |
| Keime-Guibert 2007               | EORTC     | 62.9                                             |                                                   |                                                              | ↓<br>(an improving trend)                                | 25.7                                          | 11                     | (refer to RoB summary)                     |
|                                  |           |                                                  |                                                   |                                                              |                                                          |                                               |                        |                                            |
| <b>Non-RCTs</b>                  |           |                                                  |                                                   |                                                              |                                                          |                                               |                        |                                            |
| Gallego 2011                     | EORTC     | Mean or median was not reported                  | ↑↑                                                |                                                              |                                                          | 40.7                                          | 11                     | serious                                    |
|                                  |           |                                                  |                                                   |                                                              |                                                          |                                               |                        |                                            |



1  
2  
3  
4  
5  
6  
7  
8  
9  
10  
11  
12  
13  
14  
15  
16  
17  
18  
19  
20  
21  
22  
23  
24  
25  
26  
27  
28  
29  
30  
31  
32

|                     |                |                           |                                                        |                                                        |                                                   |                |    |                 |
|---------------------|----------------|---------------------------|--------------------------------------------------------|--------------------------------------------------------|---------------------------------------------------|----------------|----|-----------------|
|                     |                |                           | (narrative; mean or median was not reported)           |                                                        |                                                   |                |    |                 |
| Minniti 2009        | EORTC          | 58.3                      |                                                        | ↓                                                      |                                                   | 0              | 12 | low or moderate |
| Minniti 2013        | EORTC          | 61.5                      | ↑†                                                     |                                                        |                                                   | 58.5           | 12 | serious         |
| <b>Mixed</b>        |                |                           |                                                        |                                                        |                                                   |                |    |                 |
| Mohile 2011         | MD Anderson SI | 2.07 on the scale of 0-10 |                                                        | ↑<br>(no information on p value)                       |                                                   | 0              | 8  | serious         |
| <b>Prostate</b>     |                |                           |                                                        |                                                        |                                                   |                |    |                 |
| Arraras 2008        | EORTC          | 66.8                      |                                                        | 0                                                      | ↑†<br>ES=0.25                                     | 8              | 6  | serious         |
| <b>Colon cancer</b> |                |                           |                                                        |                                                        |                                                   |                |    |                 |
| Bouvier 2008        | EORTC          | 60                        | ↑<br>(graphical data; mean or median was not reported) | ↑<br>(graphical data; mean or median was not reported) |                                                   | No information | 8  | serious         |
| Chang 2012          | EORTC          | 59                        | ↓<br>(narrative; mean or median was not reported)      |                                                        | ↑<br>(narrative; mean or median was not reported) | 15.8           | 9  | low or moderate |
| <b>Cervical</b>     |                |                           |                                                        |                                                        |                                                   |                |    |                 |
| Caffo 2003          | Diary card     | 2.11 on the scale of 1-4  | ↑                                                      | ↑                                                      |                                                   | No information | 6  | serious         |
| <b>Lung</b>         |                |                           |                                                        |                                                        |                                                   |                |    |                 |
| Park 2013           | EORTC          | 53                        | ↓<br>(narrative; mean or median was not reported)      | ↓<br>(narrative; mean or median was not reported)      |                                                   | 9.1            | 11 | low or moderate |

33 '0' represents no change; '↑' denotes better QoL than baseline; '↓' represents worse QoL than baseline; †p < 0.05  
 34 ES=Effect size which was calculated for significant result and where mean, SD and sample size were available of the respective article  
 35 QoL scale is on the scale of 0-100 unless specified otherwise

46  
47  
48  
49

1  
2  
3 Perrone et al. (2015) examined the global and domain QoL scores of participants treated with  
4 CMF or docetaxel at baseline and during chemotherapy. This study reported a decline in the  
5 QoL scores over time; however, no information about the  $p$  value was provided.<sup>23</sup> Note that  
6  
7  
8  
9  
10 79% and 47% of the participants suffered from grade 2 or higher haematological and non-  
11 haematological toxicities, respectively.<sup>23</sup> Arraras et al. (2008a) measured the QoL of elderly  
12 participants treated with radiotherapy at baseline, at the completion of radiotherapy and 6  
13 weeks after the completion of radiotherapy.<sup>16</sup> Although this study started with a lower QoL  
14 (score of 59.5) at baseline, the global QoL score increased significantly from baseline to 6  
15 weeks after the completion of radiotherapy.<sup>16</sup>

#### 22 23 24 25 *Other QoL measures*

26  
27 Dees et al. (2000) measured QoL using the Breast Cancer Chemotherapy Questionnaire  
28 (BCQ) and found a non-significant decline in the overall QoL score from baseline to the last  
29 dose of doxorubicin/cyclophosphamide.<sup>19</sup> Hurria et al. (2006) revealed no significant  
30 differences in overall or in physical, social and emotional well-being as measured by  
31 Functional Assessment of Cancer Therapy-Breast (FACT-B) from baseline to immediately  
32 after and 6 months after completion of an anthracycline-based, taxane-based, or CMF  
33 regimen.<sup>20</sup> Note that 27% and 31% of the participants in this study suffered from grade 3 or 4  
34 haematological and non-haematological toxicities, respectively.<sup>20</sup> Crivellari et al. (2000)  
35 reported increased global QoL scores as measured by Perceived Adjustment to Chronic  
36 Illness Scale (PACIS), during and 18 months after the completion of the CMF regimen.<sup>18</sup>  
37  
38  
39  
40  
41  
42  
43  
44  
45  
46  
47  
48 Note that the participants in this study had a low QoL score of 59 at baseline. Fewer than 10%  
49 of the participants manifested grade 3 toxicity.<sup>18</sup>  
50  
51  
52  
53  
54  
55  
56  
57  
58  
59  
60

### Glioblastoma

All four studies were conducted on in participants with glioblastoma treated with temozolomide<sup>24</sup> or focal hypofractionated radiotherapy<sup>25</sup> or combined radiotherapy and temozolomide.<sup>26,27</sup> These studies assessed QoL using the EORTC QLQ-C30. Gallego et al. (2011) reported statistically significant improvements in the global and the physical, role, cognitive and social domains scores during the course of temozolomide.<sup>24</sup> Note that 25% of the participants manifested grade 3 to 4 haematological toxicity in this study.<sup>21</sup> Minniti et al. (2013) also showed statistically significant improvements in the global score and the social and cognitive domain scores from baseline to 6 months from the start of radiotherapy (which was during the course of temozolomide).<sup>27</sup> Both Keime-Gulbert et al. (2007) and Minniti et al. (2009) reported a decline in the global QoL at the completion of focal hypofractionated radiotherapy.<sup>25,26</sup> With respect to the domain scores, these two studies reported statistically significantly lower scores for the physical, cognitive and social domains, and the physical, role, and social domains, respectively, during and after radiotherapy than at baseline<sup>25,26</sup> The participants in both studies were treated with corticosteroids and anticonvulsants as supportive care. Note that in Minniti et al. (2009), the participants began with a lower QoL (score of 58.3) at baseline and that 14% of these participants developed grade 2 or 3 confusion and/or somnolence during or after radiotherapy.<sup>26</sup>

### Colon cancer

Two studies measured QoL with the EORTC QLQ-C30 at baseline and during and after chemotherapy in participants with colon cancer.<sup>27,28</sup> In Bouvier et al. (2008), the participants were treated with flurouracil/oxaliplatin/capecitabine regimen.<sup>30</sup> This study reported an increase in the global QoL scores over time; however, no information about the *p* value was

1  
2  
3 provided. Chang et al. (2012) found no significant worsening of the global and functional  
4  
5 QoL during capecitabine treatment.<sup>31</sup>  
6  
7

#### 8 9 10 Prostate cancer

11 Arraras et al. (2008b) measured QoL by using the EORTC QLQ-C30 in participants treated  
12  
13 with radiotherapy for prostate cancer.<sup>29</sup> No difference in the global QoL score was observed  
14  
15 from baseline to the last dose of radiotherapy, whereas a statistically significantly higher QoL  
16  
17 score was reported at 6 weeks after radiotherapy (ES, 0.25).<sup>29</sup>  
18  
19

#### 20 21 22 Lung cancer

23  
24 Park et al. (2013) measured QoL using the EORTC QLQ-C30 at baseline and 1month after  
25  
26 the completion of therapy with cisplatin plus vinorelbine or carboplatin plus paclitaxel in  
27  
28 participants with resectable non-small cell lung carcinoma.<sup>33</sup> In this study, the QoL score of  
29  
30 53 at baseline was low. No significant deterioration of the global QoL between baseline and  
31  
32 the follow-up evaluation was observed. Severe haematological toxicity was manifested in 39%  
33  
34 of the participants.<sup>33</sup>  
35  
36  
37  
38  
39

#### 40 41 Other cancers

42  
43 Mohile et al. (2011) studied different types of cancer, and QoL was measured before and  
44  
45 after radiotherapy using the M.D. Anderson Symptom Inventory.<sup>25</sup> In this study, the overall  
46  
47 QoL score of 2.07 on the scale of 10 at baseline was low. A higher overall QoL score was  
48  
49 shown at the completion of radiotherapy; however, no information about the *p* value was  
50  
51 provided.<sup>28</sup>  
52  
53  
54  
55  
56  
57  
58  
59  
60

## Discussion

In the context of cancer, QoL by its nature is a patient's overall appraisal of the effect of cancer and its treatment. It is a patient-centred, relevant and key clinical parameter that can assist and support clinicians in setting goals and mapping avenues for effective and tolerable cancer treatment regimens beyond extending patient survival. Although the 18 studies included in this systematic review had somewhat heterogeneous study designs, cancer populations, and measurement scales and reporting parameters of QoL to permit data pooling for meta-analysis and precise estimation, our results provide some insights that will contribute to a better understanding of the effects of adjuvant chemotherapy and/or radiotherapy on the QoL of elderly patients 65 years of age or above. Our current review suggests that QoL during and after adjuvant chemotherapy and/or radiotherapy is maintained or improves in most of patients with solid tumours.

For elderly patients with breast cancer, the non-significant negative change in the global or overall QoL was transient (during and immediately after chemotherapy or radiotherapy), as measured by the EORTC QLO-C30, FACT-B and BCQ. No lasting adverse effect on QoL was observed after completion of the adjuvant treatment (overall low or moderate to serious RoB).<sup>16,19,20,21,23</sup> Browall et al. (2008) and Watters et al. (2003) revealed an initial statistically significant declines (moderate ES), followed by progressive improvement in global QoL scores from baseline to 4 to 6 months after chemotherapy (overall serious RoB). The role and social domains of QoL was mostly impaired immediately after the completion of chemotherapy.<sup>17,22</sup>

Another finding of this review is the significant increase in the global QoL during the course of temozolomide treatment in elderly patients with glioblastoma (overall low or moderate to

1  
2  
3 serious RoB)<sup>24,27</sup> but a decreasing trend in QoL immediately after the completion of  
4  
5 radiotherapy and 3 months after radiotherapy.<sup>25,26</sup> Note that the studies by Gallego et. (2011)  
6  
7 and Minniti et al. (2013) had substantial amounts of missing data (>40%), mainly because of  
8  
9 the rapid progression of the disease in the glioblastoma population. However, the approach of  
10  
11 complete case evaluation used in the final QoL analysis could have led to a systematic bias in  
12  
13 the estimation of the true effect of adjuvant therapy on QoL towards high QoL scores.  
14  
15 Therefore, some caution should be taken in the interpretation of the significant QoL  
16  
17 improvement during the course of adjuvant therapy of elderly patients with glioblastoma.  
18  
19 Nevertheless, attrition bias is always an issue in clinical trials involving QoL assessments and  
20  
21 longitudinal follow-ups.  
22  
23  
24  
25

26  
27 Adjuvant chemotherapy or radiotherapy also does not seem to compromise the QoL of  
28  
29 elderly patients with prostate, colon or cervical cancer. This review shows a uniform trend of  
30  
31 stable or improved global or overall QoL over the course of adjuvant therapy and at follow-  
32  
33 up evaluations across the studies with prostate, colon or cervical cancer population (overall  
34  
35 serious RoB).<sup>28,29,30,32</sup> A decreasing trend in global or overall QoL during and immediately  
36  
37 after the completion of cisplatin or carboplatin treatment in elderly patients with lung cancer  
38  
39 was reported in one study (overall low to moderate RoB).<sup>33</sup>  
40  
41  
42  
43  
44

45 We expected altered functional status, co-morbidities, adverse effects, haematological status,  
46  
47 and liver and renal functional status to co-vary with the effect of adjuvant therapy on QoL,  
48  
49 and hence, to be plausible confounding factors in the geriatric and adjuvant settings. However,  
50  
51 as is the case in non-RCT settings, adjuvant therapy was allocated during the course of usual  
52  
53 treatment decisions. The non-RCTs included in this review might suffer from the  
54  
55 methodological drawbacks of uncontrolled confounding at baseline and even during the  
56  
57  
58  
59  
60

1  
2  
3 follow-up. Because no attempt was made to control confounding with a stratified design and  
4  
5 analysis, caution is warranted in the interpretation of the results. Nevertheless, we found it  
6  
7 difficult to discern whether the short period of QoL impairment and the stable or improved  
8  
9 QoL over the course of adjuvant therapy and after treatment were due to the relatively low  
10  
11 treatment toxicities, the relatively few morbid conditions or to other reasons. The fact that,  
12  
13 where reported, the QoL of elderly patients was maintained or improved over the course of  
14  
15 treatment, despite the haematological toxicity across studies,<sup>20,23,24,33</sup> suggests that stable or  
16  
17 improved QoL is unlikely to be attributable to relatively low treatment toxicity. Alternatively,  
18  
19 elderly cancer patients who undergo adjuvant therapy may experience adverse effects but can  
20  
21 tolerate them with a limited effect on their QoL. This finding may also be attributed to the  
22  
23 tendency of certain elderly patients to complain less and endure the relatively high morbidity  
24  
25 associated with adverse effects.<sup>5</sup> Elderly patients may also have a positive perception of the  
26  
27 adjuvant therapy and may adjust better to the treatment. Stone et al. examined the association  
28  
29 between global well-being and the age profile of 340,847 people and showed that people over  
30  
31 50 years of age have increased global well-being and positive emotion even in the face of a  
32  
33 decline in the physical health.<sup>34</sup> Another possible explanation for the stable or improved QoL  
34  
35 could be the response shift phenomenon, in which patients experience a shift in how they  
36  
37 appreciate their QoL over time as a result of the changes in their internal standards of  
38  
39 measurement, values or definition of QoL.<sup>35,36</sup> A future qualitative study is needed to explore  
40  
41 in detail elderly cancer patients' QoL perception and experiences in adjuvant settings and  
42  
43 their adjustment to the treatment. Nevertheless, for studies that reported a stable global or  
44  
45 overall QoL (i.e. no difference in the means) across time, a small sample size and attrition  
46  
47 bias might limit the statistical power to detect differences between the baseline and the  
48  
49 follow-up evaluations.<sup>19,21,23,25,31</sup> Furthermore, the samples of the included studies appear  
50  
51 highly functional at baseline,<sup>16-23,25-33</sup> so these studies may be subject to a selection bias  
52  
53  
54  
55  
56  
57  
58  
59  
60

1  
2  
3 pertaining to under-representation of less healthy older patients and those with limited  
4  
5 expectation of treatment benefits.<sup>3</sup>  
6  
7

## 8 9 **Conclusion**

10  
11 This review suggests that a negative change in QoL was short-lived during adjuvant  
12  
13 chemotherapy for some elderly patients with breast cancer. Adjuvant chemotherapy and  
14  
15 radiotherapy may not have detrimental effects on global or overall QoL and other QoL  
16  
17 domains in most elderly patients with solid tumours. These findings could be translated to  
18  
19 help future elderly patients better understand the impact of adjuvant therapy on their QoL,  
20  
21 and hence make treatment decisions. Nevertheless, our review results should be viewed with  
22  
23 caution because of RoB within and across the included studies. In addition, heterogeneity in  
24  
25 study design and measurement of QoL, and lack of availability of data limit the pooling of  
26  
27 data for meta-analysis and affect the robustness of the evidence synthesis. An attempt was  
28  
29 made to contact the study authors for data, but without success. There is also a possibility of  
30  
31 incompleteness of evidence because of unclear bias of the selection of reported result and the  
32  
33 search of this review did not include grey literature, unpublished studies, ongoing clinical  
34  
35 trials, and theses and dissertations. Larger and well-designed studies of elderly patients in  
36  
37 different cancer settings are warranted to further build the evidence and validate these review  
38  
39 results. These studies should include and stratify elderly patients by functional status, co-  
40  
41 morbid conditions, geriatric syndromes and prognosis to be more representative of the real-  
42  
43 world population and improve the research validity. Future studies should also include a  
44  
45 detailed profile of the cytotoxic effects of chemotherapy and radiotherapy to allow a full  
46  
47 exploration of the direct and indirect effects of adjuvant therapy on QoL. In future systematic  
48  
49 review, if sufficient data are available, meta-regression should also be conducted to examine  
50  
51 the association and interaction between the confounding factors and the QoL.  
52  
53  
54  
55  
56  
57  
58  
59  
60



**Contributors**

CKKF, KR contributed to the conception or design of the work, and analysis and interpretation of data. CKKF is responsible for drafting the manuscript. KR critically reviewed and revised the manuscript for important intellectual content. LEYT contributed to the acquisition of data and critical revision of the manuscript for intellectual content. CKKF, LEYT, KR provided final approval of the version to be published.

**Acknowledgements**

The authors thank Teo Desrene Rui Ling (TDRL), Research Assistant, for her work in literature search, eligibility assessments and study selection.

**Competing interests**

The authors declare that they have no competing interests.

**Data sharing statement**

No additional data are available

**Source of funding**

Nil

**Review protocol registration**

Nil

## References

1. Yancik R, Ries Lag. Cancer in older persons: an international issue in an aging world. *Semin Oncol* 2004;31:128-36.
2. Finkel T, Serrano M, Blasco M. The common biology of cancer and aging. *Nature* 2007;448:767-74.
3. Hurria A, Levit LA, Dale W, *et al.* Improving the evidence base for treating older adults with cancer: American Society of Clinical Oncology Statement. *J Clin Oncol* 2015; 10.1200/JCO.2015.63.0319
4. International Society of Geriatric Oncology. 2015; <http://www.siog.org/>
5. Reimer T, Gerber B. Quality of life considerations in the treatment of early stage breast cancer in the elderly. *Drugs Aging* 2010;27:791-900.
6. Wedding U, Pientka L, Hoffken K. Quality of life in elderly patients with cancer: a short review. *Eur J Cancer* 2007;43:2203-10.
7. Extermann M, Reich RR, Sehovic M. Chemotoxicity recurrence in older patients: Risk factors and effectiveness of preventive strategies-a prospective study. *Cancer* 2015;121:2984-92.
8. Joerger M, Thürlimann B, Savidan A, *et al.* Treatment of breast cancer in the elderly: a prospective, population-based Swiss study. *J Geriatr Oncol* 2013;4:39-47.
9. Taphoorn MJB, Henriksson R, Bottomley A, *et al.* Health-related quality of life in a randomized phase III study of bevacizumab, temozolomide, and radiotherapy in newly diagnosed glioblastoma. *J Clin Oncol* 2015;33:2166-75.
10. de Haesa JCJM, Curranb D, Aaronsonc NK, *et al.* Quality of life in breast cancer patients aged over 70 years, participating in the EORTC 10850 randomised clinical trial. *Eur J Cancer* 2003;39:945-51.
11. Sterne JAC, Hernan MA, Reeves BC, *et al.* ROBINS-I: a tool for assessing risk of bias in non-randomised studies of interventions. *BMJ* 2016;355:i4919. doi:10.1136/bmj.i4919
12. Mols F, Vingerhoets Ad JJM, Coebergh JW, *et al.* Quality of life among long-term breast cancer survivors: a systematic review. *Eur J Cancer* 2005;41:2613-9.
13. Cornish D, Holterhues C, van de Poll\_Franse LV, *et al.* A systematic review of health-related quality of life in cutaneous melanoma. *Ann Oncol* 2009;20:51-8.
14. Borghouts JAJ, Koes BW, Bouter LM. The clinical course and prognostic factors of non-specific neck pain: a systematic review. *Pain* 1998;77:1-13.

15. Higgins IPT, Altman DG, Gotzsche PC, et al. Cochrane Bias Methods Group  
Cochrane Statistical Methods Group. The Cochrane Collaboration's tool for assessing  
risk of bias in randomised trials. *BMJ* 2011;343:d5928. doi:10.1136/bmj.d5929
16. Arraras JI, Manterola A, Dominguez MA, et al. Impact of radiotherapy on the quality  
of life of elderly patients with localized breast cancer: a prospective study. *Clin Transl  
Oncol* 2008a;10:498-504.
17. Browall MM, Ahlberg KM, Persson LOG, et al. The impact of age on Health-Related  
Quality of Life (HRQoL) and symptoms among postmenopausal women with breast  
cancer receiving adjuvant chemotherapy. *Acta Oncol* 2008;47:207-15.
18. Crivellari D, Bonetti M, Castiglione-Gertsch M, et al. Burdens and benefits of  
adjuvant cyclophosphamide, methotrexate, and fluorouracil and tamoxifen for elderly  
patients with breast cancer: the International Breast Cancer Study Group Trial VII. *J  
Clin Oncol* 2000;18:1412-22.
19. Dees EC, O'Reilly S, Goodman SN, et al. A prospective pharmacologic evaluation of  
age-related toxicity of adjuvant chemotherapy in women with breast cancer. *Cancer  
Invest* 2000;18:521-9.
20. Hurria A, Hurria A, Zuckerman E, et al. A prospective, longitudinal study of the  
functional status and quality of life of older patients with breast cancer receiving  
adjuvant chemotherapy. *J Am Geriatr Soc* 2006;54:1119-24.
21. Kornblith AB, Lan L, Archer L, et al. Quality of life of older patients with early-stage  
breast cancer receiving adjuvant chemotherapy: a companion study to cancer and  
leukemia group B 49907. *J Clin Oncol* 2011;29:1022-8.
22. Watters JM, Yau JC, O'Rourke K, et al. Functional status is well maintained in older  
women during adjuvant chemotherapy for breast cancer. *Ann Oncol* 2003;14:1744-50.
23. Perrone F, Nuzzo F, Di Rella F, et al. Weekly docetaxel versus CMF as adjuvant  
chemotherapy for older women with early breast cancer: final results of the  
randomized phase II ELDA trial. *Ann Oncol* 2015;26:675-82.
24. Gallego Perez-Larraya J, Ducray F, Chinot O, et al. Temozolomide in elderly patients  
with newly diagnosed glioblastoma and poor performance status: an ANOCEF phase  
II trial. *J Clin Oncol* 2011;29:3050-5.
25. Keime-Guibert F, Chinot O, Taillandier L, et al. Radiotherapy for glioblastoma in the  
elderly. *N Engl J Med* 2007;356:1527-35.
26. Minniti G, De Sanctis V, Muni R et al. Hypofractionated radiotherapy followed by  
adjuvant chemotherapy with temozolomide in elderly patients with glioblastoma. *J  
Neurooncol* 2009;91:95-100.
27. Minniti G, Scaringi C, Baldoni A, et al. Health-Related quality of life in elderly  
patients with newly diagnosed glioblastoma treated with short-course radiation

- 1  
2  
3 therapy plus concomitant and adjuvant temozolomide. *Int J Radiation Oncol Biol*  
4 *Phys* 2013;86: 285-91.
- 5  
6  
7 28. Mohile SG, Heckler C, Fan L, *et al.* Age-related differences in symptoms and their  
8 interference on quality of life in 903 cancer patients undergoing radiation therapy. *J*  
9 *Geriatr Oncol* 2011;2:225-32.
- 10  
11 29. Arraras JI, Villafranca E, de la Vega FA, *et al.* The EORTC quality of life  
12 questionnaire QLQ-C30 (version 3.0). Validation study for Spanish prostate cancer  
13 patients. *Arch Esp Urol* 2008b;61:949-954.
- 14  
15 30. Bouvier AM, Jooste V, Bonnetain F, *et al.* Adjuvant treatments do not alter the  
16 quality of life in elderly patients with colorectal cancer. *Cancer* 2008;113:879-86.
- 17  
18 31. Chang HJ, Lee KW, Kim JH, *et al.* Adjuvant capecitabine chemotherapy using a  
19 tailored-dose strategy in elderly patients with colon cancer. *Ann Oncol* 2012;23:911-8.
- 20  
21 32. Caffo O, Amichetti M, Mussari S, *et al.* Physical side effects and quality of life during  
22 postoperative radiotherapy for uterine cancer. Prospective evaluation by a diary card.  
23 *Gyn Oncol* 2003;88:270-6.
- 24  
25 33. Park S, Kim IR, Baek KK, *et al.* Prospective analysis of quality of life in elderly  
26 patients treated with adjuvant chemotherapy for non-small-cell lung cancer. *Ann*  
27 *Oncol* 2013;24:1630-9.
- 28  
29 34. Stone AA, Schwartz JE, Broderick JE, *et al.* A snapshot of the age distribution of  
30 psychological well-being in the United States. *PNAS* 2010;107:9985-90.
- 31  
32 35. Cemal Y, Jewell S, Albornoz AP, *et al.* Systematic review of quality of life and  
33 patient reported outcomes in patients with oncologic related lower extremity  
34 lymphedema. *Lymphat Res Biol* 2013;11:14-9.
- 35  
36 36. Ring L, Hofer S, Heuston F, *et al.* Response shift masks the treatment impact on  
37 patient reported outcomes (PROS): the example of individual quality of life in  
38 edentulous patients. *Health Qual Life Outcomes* 2005;3:55.
- 39  
40  
41  
42  
43  
44  
45  
46  
47  
48  
49  
50  
51  
52  
53  
54  
55  
56  
57  
58  
59  
60

1  
2  
3  
4  
5  
6  
7  
8  
9  
10  
11  
12  
13  
14  
15  
16  
17  
18  
19  
20  
21  
22  
23  
24  
25  
26  
27  
28  
29  
30  
31  
32  
33  
34  
35  
36  
37  
38  
39  
40  
41  
42  
43  
44  
45  
46  
47  
48  
49  
50  
51  
52  
53  
54  
55  
56  
57  
58  
59  
60

Figure 1. Study flow diagram

Figure 2. Risk of bias summary for RCTs

For peer review only

1  
2  
3  
4  
5  
6  
7  
8  
9  
10  
11  
12  
13  
14  
15  
16  
17  
18  
19  
20  
21  
22  
23  
24  
25  
26  
27  
28  
29  
30  
31  
32  
33  
34  
35  
36  
37  
38  
39  
40  
41  
42  
43  
44  
45  
46  
47  
48  
49  
50  
51  
52  
53  
54  
55  
56  
57  
58  
59  
60

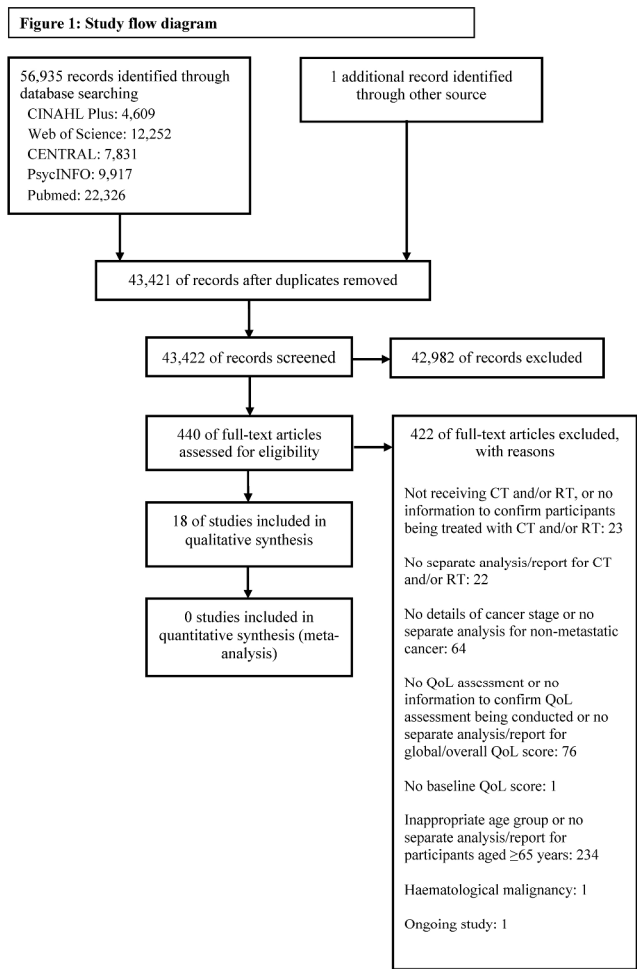

Figure 1. Study flow diagram

297x420mm (300 x 300 DPI)

1  
2  
3  
4  
5  
6  
7  
8  
9  
10  
11  
12  
13  
14  
15  
16  
17  
18  
19  
20  
21  
22  
23  
24  
25  
26  
27  
28  
29  
30  
31  
32  
33  
34  
35  
36  
37  
38  
39  
40  
41  
42  
43  
44  
45  
46  
47  
48  
49  
50  
51  
52  
53  
54  
55  
56  
57  
58  
59  
60

|                          | Random sequence generation (selection bias) | Allocation concealment (selection bias) | Blinding of participants and personnel (performance bias) | Blinding of outcome assessment (detection bias) | Incomplete outcome data (attrition bias) | Selective reporting (reporting bias) | Other bias |
|--------------------------|---------------------------------------------|-----------------------------------------|-----------------------------------------------------------|-------------------------------------------------|------------------------------------------|--------------------------------------|------------|
| Crivellari et al 2000    | +                                           | ?                                       | -                                                         | -                                               | ?                                        | +                                    | +          |
| Keime-Guibert et al 2007 | +                                           | +                                       | ?                                                         | -                                               | ?                                        | +                                    | ?          |
| Kornblith et al 2011     | +                                           | ?                                       | ?                                                         | -                                               | ?                                        | +                                    | +          |
| Perrone et al 2015       | +                                           | +                                       | ?                                                         | -                                               | +                                        | +                                    | +          |

Figure 2. Risk of bias summary for RCTs

42x55mm (300 x 300 DPI)

## Appendix A

**Electronic search strategy for PsycINFO**

1. older\*.af. OR elder\*.af. OR geriatric.af. OR gerontolog\*.af. OR senior.af. OR aged.af.
2. oncology.af. OR cancer\*.af. OR neoplasm\*.af.
3. "quality of life" .af. OR "QOL" .af.
4. #1 AND #2 AND #3

Limits: English Language, Human

For peer review only



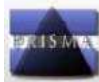

# PRISMA 2009 Checklist

1  
2  
3  
4  
5  
6  
7  
8  
9  
10  
11  
12  
13  
14  
15  
16  
17  
18  
19  
20  
21  
22  
23  
24  
25  
26  
27  
28  
29  
30  
31  
32  
33  
34  
35  
36  
37  
38  
39  
40  
41  
42  
43  
44  
45  
46  
47  
48  
49

| Section/topic                      | #  | Checklist item                                                                                                                                                                                                                                                                                              | Reported on page # |
|------------------------------------|----|-------------------------------------------------------------------------------------------------------------------------------------------------------------------------------------------------------------------------------------------------------------------------------------------------------------|--------------------|
| <b>TITLE</b>                       |    |                                                                                                                                                                                                                                                                                                             |                    |
| Title                              | 1  | Identify the report as a systematic review, meta-analysis, or both.                                                                                                                                                                                                                                         | 1                  |
| <b>ABSTRACT</b>                    |    |                                                                                                                                                                                                                                                                                                             |                    |
| Structured summary                 | 2  | Provide a structured summary including, as applicable: background; objectives; data sources; study eligibility criteria, participants, and interventions; study appraisal and synthesis methods; results; limitations; conclusions and implications of key findings; systematic review registration number. | 2                  |
| <b>INTRODUCTION</b>                |    |                                                                                                                                                                                                                                                                                                             |                    |
| Rationale                          | 3  | Describe the rationale for the review in the context of what is already known.                                                                                                                                                                                                                              | 4-5                |
| Objectives                         | 4  | Provide an explicit statement of questions being addressed with reference to participants, interventions, comparisons, outcomes, and study design (PICOS).                                                                                                                                                  | 5                  |
| <b>METHODS</b>                     |    |                                                                                                                                                                                                                                                                                                             |                    |
| Protocol and registration          | 5  | Indicate if a review protocol exists, if and where it can be accessed (e.g., Web address), and, if available, provide registration information including registration number.                                                                                                                               | 4-5                |
| Eligibility criteria               | 6  | Specify study characteristics (e.g., PICOS, length of follow-up) and report characteristics (e.g., years considered, language, publication status) used as criteria for eligibility, giving rationale.                                                                                                      | 5-6                |
| Information sources                | 7  | Describe all information sources (e.g., databases with dates of coverage, contact with study authors to identify additional studies) in the search and date last searched.                                                                                                                                  | 5                  |
| Search                             | 8  | Present full electronic search strategy for at least one database, including any limits used, such that it could be repeated.                                                                                                                                                                               | Appendix A         |
| Study selection                    | 9  | State the process for selecting studies (i.e., screening, eligibility, included in systematic review, and, if applicable, included in the meta-analysis).                                                                                                                                                   | 6-8                |
| Data collection process            | 10 | Describe method of data extraction from reports (e.g., piloted forms, independently, in duplicate) and any processes for obtaining and confirming data from investigators.                                                                                                                                  | 7                  |
| Data items                         | 11 | List and define all variables for which data were sought (e.g., PICOS, funding sources) and any assumptions and simplifications made.                                                                                                                                                                       | 7                  |
| Risk of bias in individual studies | 12 | Describe methods used for assessing risk of bias of individual studies (including specification of whether this was done at the study or outcome level), and how this information is to be used in any data synthesis.                                                                                      | 7-9                |
| Summary measures                   | 13 | State the principal summary measures (e.g., risk ratio, difference in means).                                                                                                                                                                                                                               | 9                  |
| Synthesis of results               | 14 | Describe the methods of handling data and combining results of studies, if done, including measures of consistency (e.g., $I^2$ ) for each meta-analysis.                                                                                                                                                   | 9                  |



# PRISMA 2009 Checklist

| Section/topic                 | #  | Checklist item                                                                                                                                                                                           | Reported on page #     |
|-------------------------------|----|----------------------------------------------------------------------------------------------------------------------------------------------------------------------------------------------------------|------------------------|
| Risk of bias across studies   | 15 | Specify any assessment of risk of bias that may affect the cumulative evidence (e.g., publication bias, selective reporting within studies).                                                             | 31-32                  |
| Additional analyses           | 16 | Describe methods of additional analyses (e.g., sensitivity or subgroup analyses, meta-regression), if done, indicating which were pre-specified.                                                         | No additional analysis |
| <b>RESULTS</b>                |    |                                                                                                                                                                                                          |                        |
| Study selection               | 17 | Give numbers of studies screened, assessed for eligibility, and included in the review, with reasons for exclusions at each stage, ideally with a flow diagram.                                          | 9<br>Figure 1          |
| Study characteristics         | 18 | For each study, present characteristics for which data were extracted (e.g., study size, PICOS, follow-up period) and provide the citations.                                                             | 10, 17, 18             |
| Risk of bias within studies   | 19 | Present data on risk of bias of each study and, if available, any outcome level assessment (see item 12).                                                                                                | 31-32                  |
| Results of individual studies | 20 | For all outcomes considered (benefits or harms), present, for each study: (a) simple summary data for each intervention group (b) effect estimates and confidence intervals, ideally with a forest plot. | 33<br>Figure 2         |
| Synthesis of results          | 21 | Present results of each meta-analysis done, including confidence intervals and measures of consistency.                                                                                                  | No meta-analysis       |
| Risk of bias across studies   | 22 | Present results of any assessment of risk of bias across studies (see Item 15).                                                                                                                          | 31-32                  |
| Additional analysis           | 23 | Give results of additional analyses, if done (e.g., sensitivity or subgroup analyses, meta-regression [see Item 16]).                                                                                    | No additional analysis |
| <b>DISCUSSION</b>             |    |                                                                                                                                                                                                          |                        |
| Summary of evidence           | 24 | Summarize the main findings including the strength of evidence for each main outcome; consider their relevance to key groups (e.g., healthcare providers, users, and policy makers).                     | 41-42                  |
| Limitations                   | 25 | Discuss limitations at study and outcome level (e.g., risk of bias), and at review-level (e.g., incomplete retrieval of identified research, reporting bias).                                            | 42, 44                 |
| Conclusions                   | 26 | Provide a general interpretation of the results in the context of other evidence, and implications for future research.                                                                                  | 44                     |
| <b>FUNDING</b>                |    |                                                                                                                                                                                                          |                        |
| Funding                       | 27 | Describe sources of funding for the systematic review and other support (e.g., supply of data); role of funders for the systematic review.                                                               | 45                     |

From: Moher D, Liberati A, Tetzlaff J, Altman DG, The PRISMA Group (2009). Preferred Reporting Items for Systematic Reviews and Meta-Analyses: The PRISMA Statement. PLoS Med 6(6): e1000097. doi:10.1371/journal.pmed1000097

For peer review only - <http://bmjopen.bmj.com/site/about/guidelines.xhtml>

For more information, visit: [www.prisma-statement.org](http://www.prisma-statement.org).

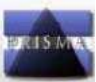

# PRISMA 2009 Checklist

- 1
- 2
- 3
- 4
- 5
- 6
- 7
- 8
- 9
- 10
- 11
- 12
- 13
- 14
- 15
- 16
- 17
- 18
- 19
- 20
- 21
- 22
- 23
- 24
- 25
- 26
- 27
- 28
- 29
- 30
- 31
- 32
- 33
- 34
- 35
- 36
- 37
- 38
- 39
- 40
- 41
- 42
- 43
- 44
- 45
- 46
- 47
- 48
- 49

For peer review only

# BMJ Open

## Quality of life of elderly patients with solid tumours undergoing adjuvant cancer therapy: a systematic review

|                                 |                                                                                                                                                                                |
|---------------------------------|--------------------------------------------------------------------------------------------------------------------------------------------------------------------------------|
| Journal:                        | <i>BMJ Open</i>                                                                                                                                                                |
| Manuscript ID                   | bmjopen-2017-018101.R2                                                                                                                                                         |
| Article Type:                   | Research                                                                                                                                                                       |
| Date Submitted by the Author:   | 31-Oct-2017                                                                                                                                                                    |
| Complete List of Authors:       | Cheng, Karis, Kin-Fong; National University of Singapore;<br>Lim, Ethel, Yee-Ting; National University of Singapore<br>Kanesvaran, Ravindran; National Cancer Centre Singapore |
| <b>Primary Subject Heading</b>: | Oncology                                                                                                                                                                       |
| Secondary Subject Heading:      | Geriatric medicine                                                                                                                                                             |
| Keywords:                       | Elderly cancer patients, Adjuvant therapy, Quality of life, CHEMOTHERAPY, RADIOTHERAPY, ONCOLOGY                                                                               |
|                                 |                                                                                                                                                                                |

SCHOLARONE™  
Manuscripts

1  
2  
3  
4  
5  
6  
7  
8 **Quality of life of elderly patients with solid tumours undergoing adjuvant cancer**  
9 **therapy: a systematic review**  
10

11  
12  
13  
14 CHENG Karis, Kin-fong<sup>1</sup>; LIM Ethel Yee Ting<sup>1</sup>; KANESVARAN Ravindran<sup>2</sup>  
15

16 <sup>1</sup>Alice Lee Centre for Nursing Studies, Yong Loo Lin School of Medicine,  
17 MD11, 10 Medical Drive, National University of Singapore, National University Health  
18 System, Singapore 117597  
19

20 <sup>2</sup>National Cancer Centre Singapore, 11 Hospital Drive, Singapore 169610  
21  
22  
23  
24  
25  
26  
27  
28  
29

30 Corresponding author:

31 CHENG Karis, Kin-fong

32 RN, PGDip Epidemiol & Biostat, PhD

33 Level 2, Block MD11, 10 Medial Drive, National University of Singapore, Singapore 117597

34 DID: (65) 6516 3117, Fax: (65) 6776 7135, E-mail: [nurckfk@nus.edu.sg](mailto:nurckfk@nus.edu.sg) or

35 [karis\\_cheng@nuhs.edu.sg](mailto:karis_cheng@nuhs.edu.sg)  
36  
37  
38  
39  
40  
41  
42  
43  
44  
45  
46  
47  
48  
49  
50  
51  
52  
53  
54  
55  
56  
57  
58  
59  
60

## Abstract

### Objectives

The measurement of quality of life (QoL) in elderly cancer population is increasingly being recognized as an important element of clinical decision-making and the evaluation of treatment outcome. This systematic review aimed to summarise the evidence of QoL during and after adjuvant therapy in elderly cancer patients.

### Methods

A systematic search was conducted of studies published in CINAHL plus, CENTRAL, PubMed, PsycINFO and Web of Science from the inception of these databases to December 2016. Eligible studies included RCTs and non-RCTs in which QoL was measured in elderly patients (65 years of age or above) with stage I to III solid tumours who were undergoing adjuvant chemotherapy and/or radiotherapy. Because of the heterogeneity and the insufficient data among the included studies, the results were synthesised narratively.

### Results

We included 4 RCTs and 14 non-RCTs on 1,785 participants. In all four RCTs, the risk of bias was low or unclear for most items but high for detection. Of the 14 non-RCTs, 5 studies were judged to have a low or moderate risk of bias for all domains, and the other 9 studies had a serious risk of bias in at least one domain. The bias was observed mainly in the confounding and in the selection of participants for the study. For most elderly patients with breast cancer, the non-significant negative change in the QoL was transient. A significant increase in the QoL during the course of temozolomide in elderly patients with glioblastoma but a decreasing trend in QoL after radiotherapy was shown. This review also shows a

1  
2  
3 uniform trend of stable or improved QoL during adjuvant therapy and at follow-up  
4  
5 evaluations across the studies with prostate, colon or cervical cancer population.  
6  
7

### 8 9 **Conclusions**

10  
11 This review suggests that adjuvant chemotherapy and radiotherapy may not have detrimental  
12  
13 effects on QoL in most elderly patients with solid tumours.  
14  
15  
16  
17

### 18 19 **Strengths and limitations of this study**

- 20  
21 • A systematic search of the published literature in major databases from their inception  
22 to December 2016 was conducted.
- 23  
24 • The risk of bias and the methodological aspects of quality of life reporting in the  
25 included studies were assessed.
- 26  
27 • The search of grey literature, unpublished studies, ongoing clinical trials, and theses  
28 and dissertations were not conducted.
- 29  
30 • The studies included in this review are mainly non-randomized controlled trials.
- 31  
32 • The meta-analysis was not conducted to pool the data and the GRADE approach was  
33 not used to assess the quality of evidence of the included studies.  
34  
35  
36  
37  
38  
39  
40  
41

### 42 **Keywords**

43  
44 Elderly cancer patients, adjuvant therapy, quality of life, chemotherapy, radiotherapy,  
45 oncology  
46  
47  
48  
49  
50  
51  
52  
53  
54  
55  
56  
57  
58  
59  
60

## Introduction

In many countries, the incidence of cancer among older people is increasing. This increase can be attributed to the remarkable growth of the elderly demographic and the common pathophysiology of cancer and aging.<sup>1-2</sup> As a result, the demands for and the importance of broadening clinical trials to include older adults, incorporating geriatric-specific endpoints,<sup>3</sup> and integrating geriatric assessment to address the needs of individuals are also increasing.<sup>4</sup> Although quality of life (QoL) is not formally a part of the geriatric assessment, the measurement of QoL in the elderly cancer population is increasingly being recognised as an important patient-reported outcome to complement the clinician's evaluation of disease progression and the determination of the clinical benefit and the burden of cancer treatment, along with toxicity, survival and mortality rates. QoL is also considered a useful outcome measure to enhance patient-clinician communication and patient compliance in elderly patients with breast cancer during cancer treatment.<sup>5</sup> In a short literature review, Wedding et al. (2007) reported that elderly cancer patients tend to perceive their QoL as more important than gains in survival when compared to younger patients.<sup>6</sup> Nevertheless, our understanding of the effect of cancer treatment on the QoL of elderly patients remains very limited. Clinically, the decisions regarding cancer therapy and the clinical management of elderly cancer patients may be complicated by their vulnerability to chemo-toxicity and the pathological changes of aging together with different considerations of the treatment benefit and harm margins, functional decline, tolerability and QoL issues. A univariate analysis by Extermann et al. (2015) revealed an association of the QoL effect with dose modification of chemotherapy in older patients.<sup>7</sup> The literature states that elderly cancer patients are less likely than their younger counterparts to be treated with a full course of adjuvant chemotherapy and radiotherapy.<sup>8</sup> Consideration should be given to approaches that can prolong life expectancy, but not at the expense of QoL and physical and psychological



1  
2  
3 functioning. For cancers with an extremely poor prognosis, such as glioblastoma, the  
4  
5 extension of survival is less clinically meaningful if the patient has a decline in QoL.<sup>9</sup>  
6  
7 Researchers have also suggested that QoL be used as the main endpoint to support clinical  
8  
9 decision-making if different cancer treatments are equally effective in terms of survival.<sup>10</sup> To  
10  
11 the best of our knowledge, a systematic review of the effects of adjuvant therapy on the QoL  
12  
13 of elderly cancer patients has not yet been published. Therefore, we undertook a systematic  
14  
15 review of the literature to summarise the evidence of global or overall QoL and other  
16  
17 domains pertaining to QoL during and after adjuvant therapy in elderly patients with stage I  
18  
19 to III solid tumours. The population, intervention, comparison, outcome, study design,  
20  
21 commonly known as PICOS, considered the question ‘Does the global or overall QoL during  
22  
23 and after adjuvant chemotherapy and/or radiotherapy decline, maintain or improve from  
24  
25 baseline in elderly patients with solid tumours in randomised controlled trials (RCTs) or non-  
26  
27 RCTs?’ In this review, QoL refers to the health-related QoL of elderly patients, considering  
28  
29 the corresponding global, physical, cognitive, psychological and social domains as affected  
30  
31 by the adjuvant therapy.  
32  
33  
34  
35  
36  
37  
38

### 39 **Methods**

40  
41 The methodology of this systematic review included a pre-specified literature search strategy,  
42  
43 inclusion and exclusion criteria, process for selecting studies, assessment of methodological  
44  
45 quality of studies and data synthesis. The review protocol was unregistered to an international  
46  
47 register. The conduct and reporting of this systematic review were in accordance with the  
48  
49 planned review methods except for the addition of assessment of risk of bias (RoB) of the  
50  
51 included studies using the Cochrane Risk of Bias tool for RCTs and Risk of Bias tool in Non-  
52  
53 Randomised Studies of Interventions (ROBINS-I).  
54  
55  
56  
57  
58  
59  
60

### Literature search strategy

A systematic electronic search of peer-reviewed English-language articles published in CINAHL plus (1937–2016), CENTRAL (1993–2016), PubMed (1996–2016), PsycINFO (1967–2016) and Web of Science (1900–2016) from the inception of these databases to December 2016 was conducted. The date last searched was in March 2017. Searches were limited to human studies published in English. A pilot search on CINAHL was performed to identify the relevant keywords contained in the title, abstract and subject descriptors. Three broad categories of concepts were searched: ‘elderly’, ‘cancer’ and ‘quality of life’. The search terms included (older\* OR elder\* OR geriatric OR gerontology\* OR senior OR aged) AND (oncology OR cancer\* OR neoplasm\*) AND (quality of life OR QOL). The full electronic search strategy is presented in Appendix A. The reference lists of the included articles were also examined to identify additional eligible articles.

### Study selection

#### *Inclusion criteria*

We included RCTs and non-RCTs in which QoL was measured in elderly patients (65 years of age or above) with stage I to III solid tumours who were undergoing adjuvant chemotherapy and/or radiotherapy. Non-RCTs include quantitative studies such as observational, before-and-after and longitudinal studies, in which the allocation of intervention (analogy of treatment) occurs during the course of the usual treatment decisions.<sup>11</sup> We required that the baseline and at least one global or overall QoL data element during and/or after adjuvant chemotherapy and/or radiotherapy be collected and reported in the studies so as to allow an in-context comparison of before and after adjuvant therapy. Studies that covered heterogeneous age groups were included if a subgroup analysis was performed and reported for those aged 65 years of age or above.

### *Exclusion criteria*

Studies were excluded if they involved patients with haematological malignancies, distant metastatic cancer or recurrent cancer without a separate analysis and report of solid tumours or non-metastatic/regional metastatic cancer. We also excluded case reports, qualitative studies, literature reviews, studies that evaluated surgical or procedure-related treatment and presented in abstract form.

### *Process for selecting studies*

We screened articles obtained from keyword searching for duplicates electronically with End-Note and then manually. After duplicate removal, we assessed the remaining articles for eligibility based on titles and abstracts. We included studies in full-text screening if they were RCTs or non-RCTs, included elderly patients with stage I to III solid tumours who were undergoing adjuvant chemotherapy and/or radiotherapy, and reported QoL. We retrieved full-text articles if we considered the studies relevant and if there was insufficient information to determine eligibility. We then examined each full-text article against the inclusion and exclusion criteria of the review.

### Data extraction

We extracted data related to publication information, sample characteristics, type of cancer, type of adjuvant chemotherapy and/or radiotherapy, supportive care, QoL measurements and results, drop-outs and authors' conclusions. Functional status and co-morbidities at baseline and therapy-related adverse effects (where reported) were also extracted because of concern that they might co-vary or confound with those of adjuvant therapy to alter the change of QoL.

### Assessment of methodological quality of studies on QoL

The methodological quality of the included studies on QoL was assessed using a checklist of predefined criteria for studies on QoL.<sup>12-13</sup> The checklist was originally developed to assess the internal and external validity of prognostic studies<sup>14</sup> and was modified to assess the methodological aspects of QoL reporting in later studies.<sup>12-13</sup> The checklist covers the following 14 items: sampling (two items), selection of QoL measurement (one item), data collection process (two items), response rate (two items), group comparison (one item), clarity of reporting (five items), and determination of prognostic factors (one item), all of which are important in QoL studies. For each item, a score of 1 or 0 was given; 1 was assigned to an item meeting the methodological criteria, while 0 was assigned if an item neither met the criteria nor described the related parameter sufficiently. The possible score ranged from 0 to 14, with scores of 10 or above, 7 to 9 and 6 or less indicating high, moderate, and low quality, respectively.<sup>12</sup>

### Assessment of risk of bias

The risk of bias (RoB) of the included studies was evaluated using the Cochrane Risk of Bias tool and the Risk of Bias tool in Non-Randomised Studies of Interventions (ROBINS-I) for RCTs and non-RCTs, respectively.<sup>11,15</sup> Both tools are domain-based evaluations of RoB with respect to the internal validity of studies. The Cochrane RoB tool covers the domains of selection, performance, detection, attrition and reporting bias, and other sources of bias. A judgement of 'yes' indicates a low risk of bias; 'no', a high risk of bias; and 'unclear', either an unclear or unknown risk of bias.<sup>15</sup> The ROBINS-I tool covers seven domains: bias due to confounding; bias in selection of participants into the study; bias in classification of interventions; bias due to deviations from intended interventions; bias due to missing data; bias in measurement of outcomes; and bias in selection of the reported results. The risk of

1  
2  
3 bias judgments within each domain are categorized as ‘low risk’ if the study is comparable to  
4  
5 a well-performed RCT, ‘moderate risk’ if the study is sound but cannot be considered  
6  
7 comparable to a well-performed RCT, ‘serious risk’ if the study has some considerable  
8  
9 problems, ‘critical risk’ if the study is too problematic, and ‘no information’. The judgments  
10  
11 within each domain contribute to the overall risk of bias.<sup>11</sup>  
12  
13

14  
15  
16 In this review, two reviewers (LEYT and TDRL) independently performed the literature  
17  
18 search, eligibility assessments and study selection. The data extraction, methodological  
19  
20 quality assessment and the RoB evaluation were conducted by CKKF and LEYT.  
21  
22 Discrepancies and disagreements were discussed and resolved by consensus.  
23  
24  
25  
26

### 27 Data synthesis

28  
29 Because of the variations in study design, cancer populations and QoL scales and the  
30  
31 insufficient data among the included studies, a meta-analysis was deemed impossible, and the  
32  
33 results were synthesised narratively taking into account of the RoB of individual studies. In  
34  
35 addition, we report a change in QoL scores from baseline to the middle of and to the  
36  
37 completion of adjuvant therapy, and to the post-treatment follow-up period of individual  
38  
39 studies where data were available. We defined ‘0’ as no change, ‘↑’ denotes better QoL than  
40  
41 baseline and ‘↓’ represents worse QoL than baseline. The effect size (ES) was also calculated  
42  
43 for individual studies for which sufficient information was available: 0.2 to <0.5 was  
44  
45 considered small, 0.5 to <0.8 moderate and  $\geq 0.8$  large.  
46  
47  
48  
49  
50  
51  
52  
53  
54  
55  
56  
57  
58  
59  
60

## Results

### Search results

The initial search identified 56,935 articles, of which 440 were considered potentially relevant after checking for duplicates and title and abstract screening. After full-text assessment of the 440 articles, 18 met the eligibility criteria for inclusion in the review and analysis (Figure 1).<sup>16-33</sup> In most cases, the articles were excluded mainly because of the lack of QoL assessment during adjuvant therapy, a separate report of participants 65 years of age or above and/or a separate report of the QoL of participants who were undergoing adjuvant therapy or suffering from non-metastatic cancer.

### Description of studies

Eleven studies were published between 2000 and 2009, and seven between 2010 and 2015. With respect to the country of origin, 10 were from Europe, four from the United States, two from South Korea and one from Canada; the other was a multi-country study. As for the study design, 13 studies were non-RCTs (before-and-after or longitudinal studies) that assessed the QoL of patients who were undergoing adjuvant chemotherapy,<sup>17,19,20,22,24,30,31,33</sup> radiotherapy<sup>16,32</sup> or concomitant chemotherapy and radiotherapy.<sup>26-28</sup> Four were RCTs<sup>18,21,23,25</sup>; two of these compared the effects of different chemotherapy regimens on QoL, one study compared the effects of chemotherapy and hormonal therapy against those of hormonal therapy alone on QoL, and the other compared the effects of radiotherapy and supportive care with those of supportive care alone on QoL. One was a validation study that involved a QoL evaluation of participants who were undergoing radiotherapy with or without hormonal therapy<sup>29</sup> (Table 1).

1  
2  
3  
4  
5  
6  
7  
8  
9  
10  
11  
12  
13  
14  
15  
16  
17  
18  
19  
20  
21  
22  
23  
24  
25  
26  
27  
28  
29  
30  
31  
32  
33  
34  
35  
36  
37  
38  
39  
40  
41  
42  
43  
44  
45  
46  
47  
48  
49

Table 1. Characteristics of the included studies

| Study / Country                             | Type of study            | Age (years)<br>Mean ± SD | Sample size<br>(≥65 years cohort) | No. of participants completed baseline QoL measurement (%) | Gender (% female) | Type of cancer       | CT/RT                                                                  | Measurement of CGA domains              | Measurement of CT/RT related toxicity/adverse effect | QoL scale (domains/subscales and score ranges)                                                                                                                                                                                                                                                                                                                                                                                                                                                                                                | QoL measurement time-point                                                                                                         |
|---------------------------------------------|--------------------------|--------------------------|-----------------------------------|------------------------------------------------------------|-------------------|----------------------|------------------------------------------------------------------------|-----------------------------------------|------------------------------------------------------|-----------------------------------------------------------------------------------------------------------------------------------------------------------------------------------------------------------------------------------------------------------------------------------------------------------------------------------------------------------------------------------------------------------------------------------------------------------------------------------------------------------------------------------------------|------------------------------------------------------------------------------------------------------------------------------------|
| Arraras et al (2008a) <sup>16</sup> , Spain | Descriptive longitudinal | 72.3 ± 5.7 (range 65-87) | 48                                | 48 (100)                                                   | 100               | Breast (Stage 1-III) | RT:<br>Local<br>Locoregional<br>Regional<br><br>(no details on dosage) | KPS<br>Co-morbidity<br>Daily activities | Selected items from NCI CTCAE                        | EORTC QLQ-C30 <sup>34</sup> (30 items – global QoL; physical, role, cognitive, emotion and social functioning scales; fatigue, nausea/vomiting and pain symptom scales; 5 single-item assessing additional symptoms and 1 single-item assessing perceived financial impact; all scales and single-item measure scores are transformed to a scale of 0 to 100, a higher score for the QoL / a functional scale indicates a better level of QoL / functioning and a higher score on a symptom scale / item represents a worse level of symptom) | <ul style="list-style-type: none"> <li>• 1<sup>st</sup> day of RT</li> <li>• Last day of RT</li> <li>• 6 weeks after RT</li> </ul> |
|                                             |                          |                          |                                   |                                                            |                   |                      |                                                                        |                                         |                                                      | EORTC QLQ-BR23 <sup>35</sup> (23 items – symptoms and side effects related to different treatment modalities, body image, sexuality,                                                                                                                                                                                                                                                                                                                                                                                                          |                                                                                                                                    |

and future perspective specific to breast cancer; all items and scale scores are transformed to a 0–100 scale, a higher score for the a functional scale indicates a better level of functioning and a higher score on a symptom scale / item represents a worse level of symptom)

|    |                                                         |                                                                       |                                            |    |           |     |                       |                                                                                                                                                                                                                                                                                                                                                                             |                   |                                |                                                                                                                             |                                                                                                                                                                                      |
|----|---------------------------------------------------------|-----------------------------------------------------------------------|--------------------------------------------|----|-----------|-----|-----------------------|-----------------------------------------------------------------------------------------------------------------------------------------------------------------------------------------------------------------------------------------------------------------------------------------------------------------------------------------------------------------------------|-------------------|--------------------------------|-----------------------------------------------------------------------------------------------------------------------------|--------------------------------------------------------------------------------------------------------------------------------------------------------------------------------------|
| 17 | Browall et al (2008) <sup>17</sup> , Sweden             | Descriptive longitudinal                                              | No information on mean age (range 65-77)   | 39 | 39 (100)  | 100 | Breast (Stage I-IIIa) | FEC: Flurouracil 600 mg/m <sup>2</sup> , epirubicin 75 mg/m <sup>2</sup> , cyclophosphamide 600 mg/m <sup>2</sup> for 6 cycles<br>or<br>CMF: Cyclophosphamide 100mg/m <sup>2</sup> , methothrexate 40 mg/m <sup>2</sup> , flurouracil 600 mg/m <sup>2</sup> for 6 cycles<br><br>(30 women also had the CT combined with RT; a 5-week RT course starting 3-4 weeks after CT) | Co-morbidity      | NR                             | EORTC QLQ-C30<br><br>EORTC QLQ-BR23                                                                                         | <ul style="list-style-type: none"> <li>• Baseline</li> <li>• 1 week after 1<sup>st</sup>, 2<sup>nd</sup>, 3<sup>rd</sup> and last cycle of CT</li> <li>• 4 months post-CT</li> </ul> |
| 35 | Crivellari et al (2000) <sup>18</sup> , Multi-countries | RCT (longitudinal) (elderly women was a subset of the original study) | No information on mean age (age ≥65 years) | 76 | 58 (76.3) | 100 | Breast (Grade I-III)  | Tamoxifen for 5 years<br>or<br>Tamoxifen plus 3 early courses of CMF (cyclophosphamide 100                                                                                                                                                                                                                                                                                  | ECOG Co-morbidity | Modified WHO toxicity criteria | PACIS <sup>36</sup> ( a single-item measure – assessing the amount of effort it costs to cope with illness which influences | <ul style="list-style-type: none"> <li>• Baseline</li> <li>• 2 months after 1<sup>st</sup> day of adjuvant therapy then every 3 months until 24 months</li> </ul>                    |



1  
2  
3  
4  
5  
6  
7  
8  
9  
10  
11  
12  
13  
14  
15  
16  
17  
18  
19  
20  
21  
22  
23  
24  
25  
26  
27  
28  
29  
30  
31  
32  
33  
34  
35  
36  
37  
38  
39  
40  
41  
42  
43  
44  
45  
46  
47  
48  
49

|                                               |                             |                       |    |           |     |                         |                                                                                                                                                                                                                                                                                                                                                                                                                                                                                                                           |                                          |                                    |                                                                                                                                                                                                                                                                                                                                                                                                                                                                                                                                                    |                                                                                                                                                         |
|-----------------------------------------------|-----------------------------|-----------------------|----|-----------|-----|-------------------------|---------------------------------------------------------------------------------------------------------------------------------------------------------------------------------------------------------------------------------------------------------------------------------------------------------------------------------------------------------------------------------------------------------------------------------------------------------------------------------------------------------------------------|------------------------------------------|------------------------------------|----------------------------------------------------------------------------------------------------------------------------------------------------------------------------------------------------------------------------------------------------------------------------------------------------------------------------------------------------------------------------------------------------------------------------------------------------------------------------------------------------------------------------------------------------|---------------------------------------------------------------------------------------------------------------------------------------------------------|
|                                               |                             |                       |    |           |     |                         | mg/m <sup>2</sup> , methotrexate<br>40 mg/m <sup>2</sup> , 5-<br>fluorouracil 600 mg/m <sup>2</sup><br>every 28 days for 4<br>cycles)                                                                                                                                                                                                                                                                                                                                                                                     |                                          |                                    | <i>subjective well-<br/>being and QoL;<br/>score range 0-<br/>100<sup>^</sup>)</i>                                                                                                                                                                                                                                                                                                                                                                                                                                                                 |                                                                                                                                                         |
| Dees et al<br>(2000) <sup>19</sup> ,<br>USA   | Descriptive<br>longitudinal | 71.4<br>(range 65-79) | 17 | 11 (64.7) | 100 | Breast<br>(Early stage) | AC:<br>Doxorubicin 60 mg/m <sup>2</sup> ,<br>cyclophosphamide 600<br>mg/m <sup>2</sup> for 4 cycles                                                                                                                                                                                                                                                                                                                                                                                                                       | NR                                       | Myelosuppression<br>Cardiotoxicity | BCQ <sup>37</sup> (30 items –<br>overall QoL;<br>consequences of<br>alopecia, positive<br>well-being,<br>physical symptoms,<br>inconvenience<br>associated with<br>treatment, fatigue,<br>emotional<br>dysfunction and<br>nausea subscales;<br>score range 0-10 <sup>^</sup> )                                                                                                                                                                                                                                                                     | <ul style="list-style-type: none"> <li>• Day 1 of each cycle</li> <li>• 2 months after completing CT</li> <li>• 6 months after completing CT</li> </ul> |
| Hurria et al<br>(2006) <sup>20</sup> ,<br>USA | Descriptive<br>longitudinal | 68<br>(range 65-84)   | 49 | 49 (100)  | 100 | Breast<br>(Stage I-III) | CMF:<br>Cyclophosphamide 600<br>mg/m <sup>2</sup> , methotrexate<br>40 mg/m <sup>2</sup> , 5-<br>fluorouracil 600 mg/m <sup>2</sup><br>every 3 weeks for 8<br>cycles<br><br>or<br><br>AC:<br>Doxorubicin 60 mg/m <sup>2</sup> ,<br>cyclophosphamide 600<br>mg/m <sup>2</sup> every 2 or 3<br>weeks for 4 cycles<br><br>or<br><br>ACT:<br>AC followed by<br>paclitaxel 175 mg/m <sup>2</sup><br>every 2 or 3 weeks for 4<br>cycles or AC followed<br>by paclitaxel 175 mg/m <sup>2</sup><br>weekly for 12 cycles<br><br>or | CCI<br>ADL<br>IADL<br>MMSE<br>GDS<br>BMI | NCI CTCAE                          | FACT-B <sup>38</sup> (44<br>items covering<br>FACT-General<br>plus the Breast<br>Cancer Subscale –<br>overall QoL (total<br>FACT-B score<br>including all the<br>subscales, score<br>range 0-144 <sup>^</sup> );<br>breast well-being<br>(score range 0-<br>36 <sup>^</sup> ), emotional<br>well-being (score<br>range 0-24 <sup>^</sup> ),<br>functional well-<br>being (score range<br>0-28 <sup>^</sup> ), physical<br>well-being (score<br>range 0-28 <sup>^</sup> ) and<br>social well-being<br>subscales (score<br>range 0-28 <sup>^</sup> ) | <ul style="list-style-type: none"> <li>• Prior to CT</li> <li>• Upon completion of CT</li> <li>• 6 months after CT</li> </ul>                           |

|                                                |                                                          |                                                                           |     |            |     |                      |                                                                                                                                                                                                                                                                                                                                                                                                                                                                                                          |                                                                                                                                           |                                                                  |                                                                                                                                               |                                                                                                                                                                                                                                                                                                                                          |
|------------------------------------------------|----------------------------------------------------------|---------------------------------------------------------------------------|-----|------------|-----|----------------------|----------------------------------------------------------------------------------------------------------------------------------------------------------------------------------------------------------------------------------------------------------------------------------------------------------------------------------------------------------------------------------------------------------------------------------------------------------------------------------------------------------|-------------------------------------------------------------------------------------------------------------------------------------------|------------------------------------------------------------------|-----------------------------------------------------------------------------------------------------------------------------------------------|------------------------------------------------------------------------------------------------------------------------------------------------------------------------------------------------------------------------------------------------------------------------------------------------------------------------------------------|
|                                                |                                                          |                                                                           |     |            |     |                      | ACT-H:<br>ACT followed by<br>trastuzumab 2 mg/kg<br>weekly for 52 weeks                                                                                                                                                                                                                                                                                                                                                                                                                                  |                                                                                                                                           |                                                                  |                                                                                                                                               |                                                                                                                                                                                                                                                                                                                                          |
|                                                |                                                          |                                                                           |     |            |     |                      | (CT regimen was at the<br>discretion of the<br>treating physician)                                                                                                                                                                                                                                                                                                                                                                                                                                       |                                                                                                                                           |                                                                  |                                                                                                                                               |                                                                                                                                                                                                                                                                                                                                          |
| 10 Kornblith et al (2011) <sup>21</sup> , USA  | RCT (longitudinal)<br><br>( <i>QoL was a sub-study</i> ) | Standard CT (CMF or AC) group 72 ± 4.6<br><br>Capecitabine group 72 ± 5.0 | 350 | 326 (93.1) | 100 | Breast (Stage I-III) | Standard CT<br>CMF:<br>Cyclophosphamide 100mg/m <sup>2</sup> from days 1 to 14, methotrexate 40 mg/m <sup>2</sup> & 5-fluorouracil 600 mg/m <sup>2</sup> on days 1 & 8 for 6 cycles<br><br>or<br><br>AC:<br>Adriamycin 60 mg/m <sup>2</sup> , cyclophosphamide 600 mg/m <sup>2</sup> on day 1 for 4 cycles<br><br>or<br><br>Test cytotoxic drug<br>Capecitabine 2000 mg/m <sup>2</sup> for 14 days; dose increased to 2500 mg/m <sup>2</sup> if no toxic effect after 1 <sup>st</sup> cycle for 6 cycles | ECOG<br>OARS (Co-morbidity)<br>HADS<br>BOMC<br>Neurobehavioral<br>Functioning & Activities of Living<br>Scale<br>Social Support<br>Survey | NCI CTCAE<br><br>Systemic adverse effects subscale of EORTC BR23 | *EORTC QLQ-C30<br><br>*EORTC BR23                                                                                                             | <ul style="list-style-type: none"> <li>• Baseline</li> <li>• Mid-CT (about day 77 for CMF, day 29 for AC, day 63 for capecitabine)</li> <li>• Post-CT (6 to 7 months for CMF, 4 to 5 months for AC and capecitabine)</li> <li>• 12 months post-baseline</li> <li>• 18 months post-baseline</li> <li>• 24 months post-baseline</li> </ul> |
| 33 Watters et al (2003) <sup>22</sup> , Canada | Descriptive longitudinal                                 | 70±5 (range 65 to 80)                                                     | 20  | 16 (80)    | 100 | Breast (Stage I-III) | Anthracycline-based adjuvant CT<br><br>Fluorouracil 500mg/m <sup>2</sup> , doxorubicin 50mg/m <sup>2</sup> , cyclophosphamide 500mg/m <sup>2</sup> at 21 days interval for 6 cycles                                                                                                                                                                                                                                                                                                                      | KPS                                                                                                                                       | NR                                                               | EORTC QLQ-C30<br><br>EORTC QLQ-BR23<br><br>SF-36 <sup>39</sup> (36 items – physical functioning, role limitations because of physical health) | <ul style="list-style-type: none"> <li>• Prior to CT</li> <li>• Before the 3<sup>rd</sup> cycle</li> <li>• Completion of CT</li> <li>• 6 months post-CT</li> </ul>                                                                                                                                                                       |

problems, bodily pain, social functioning, general mental health, role limitations because of emotional health problems, vitality and general health perceptions domains; all domain scores are transformed to a scale of 0 to 100<sup>^</sup>; these domain scores then combined to calculate the physical & mental component scores; score range 0-100<sup>^</sup>)

|    |                                             |                                           |                                                                        |     |            |     |                      |                                                                                                                                                                                                                                                                      |                                           |           |                                                                                                                                                                                         |                                                                                                                                                                                            |
|----|---------------------------------------------|-------------------------------------------|------------------------------------------------------------------------|-----|------------|-----|----------------------|----------------------------------------------------------------------------------------------------------------------------------------------------------------------------------------------------------------------------------------------------------------------|-------------------------------------------|-----------|-----------------------------------------------------------------------------------------------------------------------------------------------------------------------------------------|--------------------------------------------------------------------------------------------------------------------------------------------------------------------------------------------|
| 1  |                                             |                                           |                                                                        |     |            |     |                      |                                                                                                                                                                                                                                                                      |                                           |           |                                                                                                                                                                                         |                                                                                                                                                                                            |
| 2  |                                             |                                           |                                                                        |     |            |     |                      |                                                                                                                                                                                                                                                                      |                                           |           |                                                                                                                                                                                         |                                                                                                                                                                                            |
| 3  |                                             |                                           |                                                                        |     |            |     |                      |                                                                                                                                                                                                                                                                      |                                           |           |                                                                                                                                                                                         |                                                                                                                                                                                            |
| 4  |                                             |                                           |                                                                        |     |            |     |                      |                                                                                                                                                                                                                                                                      |                                           |           |                                                                                                                                                                                         |                                                                                                                                                                                            |
| 5  |                                             |                                           |                                                                        |     |            |     |                      |                                                                                                                                                                                                                                                                      |                                           |           |                                                                                                                                                                                         |                                                                                                                                                                                            |
| 6  |                                             |                                           |                                                                        |     |            |     |                      |                                                                                                                                                                                                                                                                      |                                           |           |                                                                                                                                                                                         |                                                                                                                                                                                            |
| 7  |                                             |                                           |                                                                        |     |            |     |                      |                                                                                                                                                                                                                                                                      |                                           |           |                                                                                                                                                                                         |                                                                                                                                                                                            |
| 8  |                                             |                                           |                                                                        |     |            |     |                      |                                                                                                                                                                                                                                                                      |                                           |           |                                                                                                                                                                                         |                                                                                                                                                                                            |
| 9  |                                             |                                           |                                                                        |     |            |     |                      |                                                                                                                                                                                                                                                                      |                                           |           |                                                                                                                                                                                         |                                                                                                                                                                                            |
| 10 |                                             |                                           |                                                                        |     |            |     |                      |                                                                                                                                                                                                                                                                      |                                           |           |                                                                                                                                                                                         |                                                                                                                                                                                            |
| 11 |                                             |                                           |                                                                        |     |            |     |                      |                                                                                                                                                                                                                                                                      |                                           |           |                                                                                                                                                                                         |                                                                                                                                                                                            |
| 12 |                                             |                                           |                                                                        |     |            |     |                      |                                                                                                                                                                                                                                                                      |                                           |           |                                                                                                                                                                                         |                                                                                                                                                                                            |
| 13 |                                             |                                           |                                                                        |     |            |     |                      |                                                                                                                                                                                                                                                                      |                                           |           |                                                                                                                                                                                         |                                                                                                                                                                                            |
| 14 |                                             |                                           |                                                                        |     |            |     |                      |                                                                                                                                                                                                                                                                      |                                           |           |                                                                                                                                                                                         |                                                                                                                                                                                            |
| 15 |                                             |                                           |                                                                        |     |            |     |                      |                                                                                                                                                                                                                                                                      |                                           |           |                                                                                                                                                                                         |                                                                                                                                                                                            |
| 16 |                                             |                                           |                                                                        |     |            |     |                      |                                                                                                                                                                                                                                                                      |                                           |           |                                                                                                                                                                                         |                                                                                                                                                                                            |
| 17 |                                             |                                           |                                                                        |     |            |     |                      |                                                                                                                                                                                                                                                                      |                                           |           |                                                                                                                                                                                         |                                                                                                                                                                                            |
| 18 |                                             |                                           |                                                                        |     |            |     |                      |                                                                                                                                                                                                                                                                      |                                           |           |                                                                                                                                                                                         |                                                                                                                                                                                            |
| 19 |                                             |                                           |                                                                        |     |            |     |                      |                                                                                                                                                                                                                                                                      |                                           |           |                                                                                                                                                                                         |                                                                                                                                                                                            |
| 20 |                                             |                                           |                                                                        |     |            |     |                      |                                                                                                                                                                                                                                                                      |                                           |           |                                                                                                                                                                                         |                                                                                                                                                                                            |
| 21 | Perrone et al (2015) <sup>23</sup> , Italy  | RCT (longitudinal)                        | CMF: Median 71 (range 65-79)<br><br>Docetaxel: Median 71 (range 65-79) | 299 | 252 (84.3) | 100 | Breast (Stage 1-III) | CMF: Cyclophosphamide 600 mg/m <sup>2</sup> , methotrexate 40 mg/m <sup>2</sup> , fluorouracil 600 mg/m <sup>2</sup> on days 1 & 8 every 4 weeks for 4 or 6 cycles<br><br>or<br><br>Docetaxel 35 mg/m <sup>2</sup> on days 1, 8 & 15 every 4 weeks for 4 or 6 cycles | ECOG<br>CCI<br>ADL<br>IADL                | NCI CTCAE | *EORTC QLQ-C30<br><br>*EORTC QLQ-BR23                                                                                                                                                   | <ul style="list-style-type: none"> <li>• Baseline</li> <li>• End of 1<sup>st</sup> CT cycle</li> <li>• End of 2<sup>nd</sup> CT cycle</li> <li>• End of 3<sup>rd</sup> CT cycle</li> </ul> |
| 22 |                                             |                                           |                                                                        |     |            |     |                      |                                                                                                                                                                                                                                                                      |                                           |           |                                                                                                                                                                                         |                                                                                                                                                                                            |
| 23 |                                             |                                           |                                                                        |     |            |     |                      |                                                                                                                                                                                                                                                                      |                                           |           |                                                                                                                                                                                         |                                                                                                                                                                                            |
| 24 |                                             |                                           |                                                                        |     |            |     |                      |                                                                                                                                                                                                                                                                      |                                           |           |                                                                                                                                                                                         |                                                                                                                                                                                            |
| 25 |                                             |                                           |                                                                        |     |            |     |                      |                                                                                                                                                                                                                                                                      |                                           |           |                                                                                                                                                                                         |                                                                                                                                                                                            |
| 26 |                                             |                                           |                                                                        |     |            |     |                      |                                                                                                                                                                                                                                                                      |                                           |           |                                                                                                                                                                                         |                                                                                                                                                                                            |
| 27 |                                             |                                           |                                                                        |     |            |     |                      |                                                                                                                                                                                                                                                                      |                                           |           |                                                                                                                                                                                         |                                                                                                                                                                                            |
| 28 |                                             |                                           |                                                                        |     |            |     |                      |                                                                                                                                                                                                                                                                      |                                           |           |                                                                                                                                                                                         |                                                                                                                                                                                            |
| 29 |                                             |                                           |                                                                        |     |            |     |                      |                                                                                                                                                                                                                                                                      |                                           |           |                                                                                                                                                                                         |                                                                                                                                                                                            |
| 30 |                                             |                                           |                                                                        |     |            |     |                      |                                                                                                                                                                                                                                                                      |                                           |           |                                                                                                                                                                                         |                                                                                                                                                                                            |
| 31 |                                             |                                           |                                                                        |     |            |     |                      |                                                                                                                                                                                                                                                                      |                                           |           |                                                                                                                                                                                         |                                                                                                                                                                                            |
| 32 |                                             |                                           |                                                                        |     |            |     |                      |                                                                                                                                                                                                                                                                      |                                           |           |                                                                                                                                                                                         |                                                                                                                                                                                            |
| 33 | Gallego et al (2011) <sup>24</sup> , France | Descriptive longitudinal (phase II trial) | Median 77 (range 70-87)                                                | 70  | 59 (84.3)  | 60  | Glioblastoma         | Temozolomide (150-200 mg/m <sup>2</sup> for 5 days every 4 weeks for 12 cycles / until disease progression)<br><br>(adjusted based on toxicity)                                                                                                                      | KPS (<70 as eligibility criteria)<br>MMSE | NCI CTCAE | *EORTC QLQ-C30<br><br>*EORTC QLQ-BN20 <sup>40</sup> (20 items – functional deficits, symptoms, toxic effects of treatment, and uncertainty about the future; all items and scale scores | <ul style="list-style-type: none"> <li>• Baseline</li> <li>• At least every month (restricted to the period of temozolomide period due to poor-prognosis)</li> </ul>                       |
| 34 |                                             |                                           |                                                                        |     |            |     |                      |                                                                                                                                                                                                                                                                      |                                           |           |                                                                                                                                                                                         |                                                                                                                                                                                            |
| 35 |                                             |                                           |                                                                        |     |            |     |                      |                                                                                                                                                                                                                                                                      |                                           |           |                                                                                                                                                                                         |                                                                                                                                                                                            |
| 36 |                                             |                                           |                                                                        |     |            |     |                      |                                                                                                                                                                                                                                                                      |                                           |           |                                                                                                                                                                                         |                                                                                                                                                                                            |
| 37 |                                             |                                           |                                                                        |     |            |     |                      |                                                                                                                                                                                                                                                                      |                                           |           |                                                                                                                                                                                         |                                                                                                                                                                                            |
| 38 |                                             |                                           |                                                                        |     |            |     |                      |                                                                                                                                                                                                                                                                      |                                           |           |                                                                                                                                                                                         |                                                                                                                                                                                            |
| 39 |                                             |                                           |                                                                        |     |            |     |                      |                                                                                                                                                                                                                                                                      |                                           |           |                                                                                                                                                                                         |                                                                                                                                                                                            |
| 40 |                                             |                                           |                                                                        |     |            |     |                      |                                                                                                                                                                                                                                                                      |                                           |           |                                                                                                                                                                                         |                                                                                                                                                                                            |
| 41 |                                             |                                           |                                                                        |     |            |     |                      |                                                                                                                                                                                                                                                                      |                                           |           |                                                                                                                                                                                         |                                                                                                                                                                                            |
| 42 |                                             |                                           |                                                                        |     |            |     |                      |                                                                                                                                                                                                                                                                      |                                           |           |                                                                                                                                                                                         |                                                                                                                                                                                            |
| 43 |                                             |                                           |                                                                        |     |            |     |                      |                                                                                                                                                                                                                                                                      |                                           |           |                                                                                                                                                                                         |                                                                                                                                                                                            |
| 44 |                                             |                                           |                                                                        |     |            |     |                      |                                                                                                                                                                                                                                                                      |                                           |           |                                                                                                                                                                                         |                                                                                                                                                                                            |
| 45 |                                             |                                           |                                                                        |     |            |     |                      |                                                                                                                                                                                                                                                                      |                                           |           |                                                                                                                                                                                         |                                                                                                                                                                                            |
| 46 |                                             |                                           |                                                                        |     |            |     |                      |                                                                                                                                                                                                                                                                      |                                           |           |                                                                                                                                                                                         |                                                                                                                                                                                            |
| 47 |                                             |                                           |                                                                        |     |            |     |                      |                                                                                                                                                                                                                                                                      |                                           |           |                                                                                                                                                                                         |                                                                                                                                                                                            |
| 48 |                                             |                                           |                                                                        |     |            |     |                      |                                                                                                                                                                                                                                                                      |                                           |           |                                                                                                                                                                                         |                                                                                                                                                                                            |
| 49 |                                             |                                           |                                                                        |     |            |     |                      |                                                                                                                                                                                                                                                                      |                                           |           |                                                                                                                                                                                         |                                                                                                                                                                                            |

|                                                   |                                           |                                                       |    |           |      |              |                                                                                                                                                                                                                                                                                                                         |                                                          |           |                                                                                                                                                             |                                                                                                                                                                                               |
|---------------------------------------------------|-------------------------------------------|-------------------------------------------------------|----|-----------|------|--------------|-------------------------------------------------------------------------------------------------------------------------------------------------------------------------------------------------------------------------------------------------------------------------------------------------------------------------|----------------------------------------------------------|-----------|-------------------------------------------------------------------------------------------------------------------------------------------------------------|-----------------------------------------------------------------------------------------------------------------------------------------------------------------------------------------------|
|                                                   |                                           |                                                       |    |           |      |              |                                                                                                                                                                                                                                                                                                                         |                                                          |           | are transformed to a 0–100 scale, with higher scores of functioning indicating greater functioning and higher scores on symptoms reflecting worse symptoms) |                                                                                                                                                                                               |
| Keime-Guibert et al (2007) <sup>25</sup> , France | RCT (longitudinal)                        | Supportive care + RT group<br>Median 75 (range 70-84) | 39 | 35 (89.7) | 37   | Glioblastoma | Supportive care (corticosteroids & anticonvulsant agents, physical and psychological support, management by a palliative care team) & RT (1.8 Gy given 5 days per week, total dose of 50 Gy)                                                                                                                            | KPS ( $\geq 70$ as eligibility criteria)<br>MMSE         | NCI CTCAE | *EORTC QLQ-C30<br><br>*EORTC QLQ-BN20                                                                                                                       | <ul style="list-style-type: none"> <li>• Baseline</li> <li>• Day 30</li> <li>• Day 60</li> <li>• Day 90</li> <li>• Day 135</li> </ul>                                                         |
| Minniti et al (2009) <sup>26</sup> , Italy        | Descriptive longitudinal                  | Median 73 (range 70-79)                               | 43 | 36 (83.7) | 51.2 | Glioblastoma | Focal hypofractionated RT (total dose of 30 Gy in 6 fractions over 2 weeks) followed by adjuvant temozolomide 5 days every 28 days up to 12 cycles; 150 mg/m <sup>2</sup> for 1 <sup>st</sup> cycle and adjusted based on toxicity for subsequent cycles                                                                | KPS ( $\geq 60$ as eligibility criteria)<br>Co-morbidity | NCI CTCAE | *EORTC QLQ-C30                                                                                                                                              | <ul style="list-style-type: none"> <li>• Before RT</li> <li>• After RT</li> <li>• 2<sup>nd</sup>, 4<sup>th</sup> &amp; 6<sup>th</sup> cycles of temozolomide</li> </ul>                       |
| Minniti et al (2013) <sup>27</sup> , Italy        | Descriptive longitudinal (phase II trial) | Median 73 (range 70-81)                               | 71 | 65 (91.5) | 49.2 | Glioblastoma | Focal hypofractionated RT (total dose of 40 Gy in 15 fractions) plus concomitant temozolomide 75mg/m <sup>2</sup> given 7 days/week followed by adjuvant temozolomide 5 days every 28 days for 12 cycles (adjuvant was started 4 weeks after the completion of RT); 150 mg/m <sup>2</sup> for 1 <sup>st</sup> cycle and | KPS<br>MMSE                                              | NR        | *EORTC QLQ-C30<br><br>*EORTC QLQ-BN20                                                                                                                       | <ul style="list-style-type: none"> <li>• Before RT</li> <li>• 4 weeks after RT (before the start of adjuvant temozolomide)</li> <li>• Every 8 weeks during treatment until disease</li> </ul> |

1  
2  
3  
4  
5  
6  
7  
8  
9  
10  
11  
12  
13  
14  
15  
16  
17  
18  
19  
20  
21  
22  
23  
24  
25  
26  
27  
28  
29  
30  
31  
32  
33  
34  
35  
36  
37  
38  
39  
40  
41  
42  
43  
44  
45  
46  
47  
48  
49

200 mg/m<sup>2</sup> from 2<sup>nd</sup>  
cycle onwards

progression

|                                             |                                       |                           |     |           |      |                                                                                                                                                                                                                                                                                                   |                                                                                                                                                                                                                                                              |     |    |                                                                                                                                                                                                                                                                                                                                                                                                                                       |                                                                                                                                    |
|---------------------------------------------|---------------------------------------|---------------------------|-----|-----------|------|---------------------------------------------------------------------------------------------------------------------------------------------------------------------------------------------------------------------------------------------------------------------------------------------------|--------------------------------------------------------------------------------------------------------------------------------------------------------------------------------------------------------------------------------------------------------------|-----|----|---------------------------------------------------------------------------------------------------------------------------------------------------------------------------------------------------------------------------------------------------------------------------------------------------------------------------------------------------------------------------------------------------------------------------------------|------------------------------------------------------------------------------------------------------------------------------------|
| Mohile et al (2011) <sup>28</sup> , USA     | Descriptive before/after              | Median 74.1 (range 65-92) | 368 | 368 (100) | 58.4 | Breast (17.1%)<br>Genitourinary (30.4%)<br>Lung (15.8%)<br>Brain and peripheral nervous system (6.5%)<br>Alimentary (10.1%)<br>Haematologic (4.9%)<br>Head and Neck (6.3%)<br>Soft tissue sarcoma (1.6%)<br>Bone and cartilaginous (1.4%)<br>Skin (3.3%)<br>Gynecologic (0.8%)<br>Melanoma (0.3%) | RT<br>Median total dose of 57.6 Gy (range 30-161)                                                                                                                                                                                                            | NR  | NR | Symptom Inventory (10 items adapted from the core set of symptom items and 5 items adapted from symptom interference items of the M.D. Anderson Symptom Inventory <sup>41</sup> – symptoms and side effects related to cancer and its treatment, and interference of symptoms; and an additional item of interference with overall QoL; score range 0-10, with higher scores indicating worse symptoms / worse interference with QoL) | <ul style="list-style-type: none"> <li>• Before RT</li> <li>• During the last week of RT</li> </ul>                                |
| Arraras et al (2008b) <sup>29</sup> , Spain | Descriptive longitudinal (validation) | 70.9 ± 5.2                | 137 | 137 (100) | 0    | Prostate (Localized)                                                                                                                                                                                                                                                                              | <p>Lower risk:<br/>RT alone (total dose of 72 Gy)</p> <p>Intermediate risk:<br/>Neoadjuvant and concomitant combination of an anti-androgen and an LHRH analogue (6 months) + RT (total dose of 76 Gy)</p> <p>High risk:<br/>Neoadjuvant and concomitant</p> | KPS | NR | EORTC QLQ-C30                                                                                                                                                                                                                                                                                                                                                                                                                         | <ul style="list-style-type: none"> <li>• 1<sup>st</sup> day of RT</li> <li>• Last day of RT</li> <li>• 6 weeks after RT</li> </ul> |

combination of an anti-androgen and an LHRH analogue (6 months) + RT (total dose of 76 Gy) + adjuvant LHRH analogue

|    |                                                |                                 |                                             |                                                                                                               |           |     |                      |                                                                                                                                                                                              |                                               |                                                                                              |                                                                                                                                                                                                                            |                                                                                                                                                                                                                                        |
|----|------------------------------------------------|---------------------------------|---------------------------------------------|---------------------------------------------------------------------------------------------------------------|-----------|-----|----------------------|----------------------------------------------------------------------------------------------------------------------------------------------------------------------------------------------|-----------------------------------------------|----------------------------------------------------------------------------------------------|----------------------------------------------------------------------------------------------------------------------------------------------------------------------------------------------------------------------------|----------------------------------------------------------------------------------------------------------------------------------------------------------------------------------------------------------------------------------------|
| 1  |                                                |                                 |                                             |                                                                                                               |           |     |                      |                                                                                                                                                                                              |                                               |                                                                                              |                                                                                                                                                                                                                            |                                                                                                                                                                                                                                        |
| 2  |                                                |                                 |                                             |                                                                                                               |           |     |                      |                                                                                                                                                                                              |                                               |                                                                                              |                                                                                                                                                                                                                            |                                                                                                                                                                                                                                        |
| 3  |                                                |                                 |                                             |                                                                                                               |           |     |                      |                                                                                                                                                                                              |                                               |                                                                                              |                                                                                                                                                                                                                            |                                                                                                                                                                                                                                        |
| 4  |                                                |                                 |                                             |                                                                                                               |           |     |                      |                                                                                                                                                                                              |                                               |                                                                                              |                                                                                                                                                                                                                            |                                                                                                                                                                                                                                        |
| 5  |                                                |                                 |                                             |                                                                                                               |           |     |                      |                                                                                                                                                                                              |                                               |                                                                                              |                                                                                                                                                                                                                            |                                                                                                                                                                                                                                        |
| 6  |                                                |                                 |                                             |                                                                                                               |           |     |                      |                                                                                                                                                                                              |                                               |                                                                                              |                                                                                                                                                                                                                            |                                                                                                                                                                                                                                        |
| 7  |                                                |                                 |                                             |                                                                                                               |           |     |                      |                                                                                                                                                                                              |                                               |                                                                                              |                                                                                                                                                                                                                            |                                                                                                                                                                                                                                        |
| 8  |                                                |                                 |                                             |                                                                                                               |           |     |                      |                                                                                                                                                                                              |                                               |                                                                                              |                                                                                                                                                                                                                            |                                                                                                                                                                                                                                        |
| 9  | Bouvier et al (2008) <sup>30</sup> , France    | Descriptive longitudinal survey | No information on mean age (range 75 – 85+) | 11 (only 11 patients with stage III colon cancer treated with adjuvant CT and their QoL scores were reported) | 11 (100)  | NR  | Colon                | Flurouracil<br>or<br>Oxaliplatin plus flurouracil<br>or<br>Capecitabine<br>(no details on dosage)                                                                                            | NR                                            | NR                                                                                           | EORTC QLQ-C30                                                                                                                                                                                                              | <ul style="list-style-type: none"> <li>• At the time of diagnosis</li> <li>• 3 months after diagnosis</li> <li>• 6 months after diagnosis (CT was given within 6 months after surgery)</li> <li>• 12 months after diagnosis</li> </ul> |
| 10 |                                                |                                 |                                             |                                                                                                               |           |     |                      |                                                                                                                                                                                              |                                               |                                                                                              |                                                                                                                                                                                                                            |                                                                                                                                                                                                                                        |
| 11 |                                                |                                 |                                             |                                                                                                               |           |     |                      |                                                                                                                                                                                              |                                               |                                                                                              |                                                                                                                                                                                                                            |                                                                                                                                                                                                                                        |
| 12 |                                                |                                 |                                             |                                                                                                               |           |     |                      |                                                                                                                                                                                              |                                               |                                                                                              |                                                                                                                                                                                                                            |                                                                                                                                                                                                                                        |
| 13 |                                                |                                 |                                             |                                                                                                               |           |     |                      |                                                                                                                                                                                              |                                               |                                                                                              |                                                                                                                                                                                                                            |                                                                                                                                                                                                                                        |
| 14 |                                                |                                 |                                             |                                                                                                               |           |     |                      |                                                                                                                                                                                              |                                               |                                                                                              |                                                                                                                                                                                                                            |                                                                                                                                                                                                                                        |
| 15 |                                                |                                 |                                             |                                                                                                               |           |     |                      |                                                                                                                                                                                              |                                               |                                                                                              |                                                                                                                                                                                                                            |                                                                                                                                                                                                                                        |
| 16 |                                                |                                 |                                             |                                                                                                               |           |     |                      |                                                                                                                                                                                              |                                               |                                                                                              |                                                                                                                                                                                                                            |                                                                                                                                                                                                                                        |
| 17 |                                                |                                 |                                             |                                                                                                               |           |     |                      |                                                                                                                                                                                              |                                               |                                                                                              |                                                                                                                                                                                                                            |                                                                                                                                                                                                                                        |
| 18 |                                                |                                 |                                             |                                                                                                               |           |     |                      |                                                                                                                                                                                              |                                               |                                                                                              |                                                                                                                                                                                                                            |                                                                                                                                                                                                                                        |
| 19 |                                                |                                 |                                             |                                                                                                               |           |     |                      |                                                                                                                                                                                              |                                               |                                                                                              |                                                                                                                                                                                                                            |                                                                                                                                                                                                                                        |
| 20 |                                                |                                 |                                             |                                                                                                               |           |     |                      |                                                                                                                                                                                              |                                               |                                                                                              |                                                                                                                                                                                                                            |                                                                                                                                                                                                                                        |
| 21 |                                                |                                 |                                             |                                                                                                               |           |     |                      |                                                                                                                                                                                              |                                               |                                                                                              |                                                                                                                                                                                                                            |                                                                                                                                                                                                                                        |
| 22 |                                                |                                 |                                             |                                                                                                               |           |     |                      |                                                                                                                                                                                              |                                               |                                                                                              |                                                                                                                                                                                                                            |                                                                                                                                                                                                                                        |
| 23 |                                                |                                 |                                             |                                                                                                               |           |     |                      |                                                                                                                                                                                              |                                               |                                                                                              |                                                                                                                                                                                                                            |                                                                                                                                                                                                                                        |
| 24 | Chang et al (2012) <sup>31</sup> , South Korea | Descriptive longitudinal        | Median 74.5 (range 70-90)                   | 82                                                                                                            | 57 (69.5) | 64  | Colon (Stage II-III) | Capecitabine (oral, 750-1250 mg/m <sup>2</sup> , twice daily on days 1-14 every 3 weeks for 8 cycles) (dose level was determined a/c toxicity effects during the first and preceding cycles) | ECOG PS (0-2 as eligibility criteria)<br>CACI | NCI CTCAE (adequate hematologic, hepatic, and renal function status as eligibility criteria) | EORTC QLQ-C30                                                                                                                                                                                                              | <ul style="list-style-type: none"> <li>• Baseline</li> <li>• 3 months during CT</li> <li>• 6 months during CT</li> <li>• 3-6 months after completion of CT</li> </ul>                                                                  |
| 25 |                                                |                                 |                                             |                                                                                                               |           |     |                      |                                                                                                                                                                                              |                                               |                                                                                              |                                                                                                                                                                                                                            |                                                                                                                                                                                                                                        |
| 26 |                                                |                                 |                                             |                                                                                                               |           |     |                      |                                                                                                                                                                                              |                                               |                                                                                              |                                                                                                                                                                                                                            |                                                                                                                                                                                                                                        |
| 27 |                                                |                                 |                                             |                                                                                                               |           |     |                      |                                                                                                                                                                                              |                                               |                                                                                              |                                                                                                                                                                                                                            |                                                                                                                                                                                                                                        |
| 28 |                                                |                                 |                                             |                                                                                                               |           |     |                      |                                                                                                                                                                                              |                                               |                                                                                              |                                                                                                                                                                                                                            |                                                                                                                                                                                                                                        |
| 29 |                                                |                                 |                                             |                                                                                                               |           |     |                      |                                                                                                                                                                                              |                                               |                                                                                              |                                                                                                                                                                                                                            |                                                                                                                                                                                                                                        |
| 30 |                                                |                                 |                                             |                                                                                                               |           |     |                      |                                                                                                                                                                                              |                                               |                                                                                              |                                                                                                                                                                                                                            |                                                                                                                                                                                                                                        |
| 31 |                                                |                                 |                                             |                                                                                                               |           |     |                      |                                                                                                                                                                                              |                                               |                                                                                              |                                                                                                                                                                                                                            |                                                                                                                                                                                                                                        |
| 32 | Caffo et al (2003) <sup>32</sup> , Italy       | Descriptive longitudinal        | Median 62.5 (range 46-81)                   | 25 (no information on the breakdown of sample size by age group)                                              | -         | 100 | Cervical endometrium | Post-operative external pelvic RT (median total dose of 50.4 Gy, range 45-66.6 Gy, at a dose of 1.8-2.0 Gy 5 times/week)                                                                     | NR                                            | Diarrhoea                                                                                    | Diary card <sup>42</sup> (12 items – global QoL, physical side effects observed during external pelvic RT, daily activities, and psychological well-being; score range 1-4, with higher scores of QoL, psychological well- | <ul style="list-style-type: none"> <li>• Diary card:</li> <li>• At the start of RT</li> <li>• Daily during RT period (reported as mean weekly scores)</li> </ul>                                                                       |
| 33 |                                                |                                 |                                             |                                                                                                               |           |     |                      |                                                                                                                                                                                              |                                               |                                                                                              |                                                                                                                                                                                                                            |                                                                                                                                                                                                                                        |
| 34 |                                                |                                 |                                             |                                                                                                               |           |     |                      |                                                                                                                                                                                              |                                               |                                                                                              |                                                                                                                                                                                                                            |                                                                                                                                                                                                                                        |
| 35 |                                                |                                 |                                             |                                                                                                               |           |     |                      |                                                                                                                                                                                              |                                               |                                                                                              |                                                                                                                                                                                                                            |                                                                                                                                                                                                                                        |
| 36 |                                                |                                 |                                             |                                                                                                               |           |     |                      |                                                                                                                                                                                              |                                               |                                                                                              |                                                                                                                                                                                                                            |                                                                                                                                                                                                                                        |
| 37 |                                                |                                 |                                             |                                                                                                               |           |     |                      |                                                                                                                                                                                              |                                               |                                                                                              |                                                                                                                                                                                                                            |                                                                                                                                                                                                                                        |
| 38 |                                                |                                 |                                             |                                                                                                               |           |     |                      |                                                                                                                                                                                              |                                               |                                                                                              |                                                                                                                                                                                                                            |                                                                                                                                                                                                                                        |
| 39 |                                                |                                 |                                             |                                                                                                               |           |     |                      |                                                                                                                                                                                              |                                               |                                                                                              |                                                                                                                                                                                                                            |                                                                                                                                                                                                                                        |
| 40 |                                                |                                 |                                             |                                                                                                               |           |     |                      |                                                                                                                                                                                              |                                               |                                                                                              |                                                                                                                                                                                                                            |                                                                                                                                                                                                                                        |
| 41 |                                                |                                 |                                             |                                                                                                               |           |     |                      |                                                                                                                                                                                              |                                               |                                                                                              |                                                                                                                                                                                                                            | EORTC QLQ-C30:                                                                                                                                                                                                                         |
| 42 |                                                |                                 |                                             |                                                                                                               |           |     |                      |                                                                                                                                                                                              |                                               |                                                                                              |                                                                                                                                                                                                                            |                                                                                                                                                                                                                                        |

1  
2  
3  
4  
5  
6  
7  
8  
9  
10  
11  
12  
13  
14  
15  
16  
17  
18  
19  
20  
21  
22  
23  
24  
25  
26  
27  
28  
29  
30  
31  
32  
33  
34  
35  
36  
37  
38  
39  
40  
41  
42  
43  
44  
45  
46  
47  
48  
49

|                                               |                          |                         |    |          |     |                                                                          |                                                                                                                                                                                                                                                                                                                 |                   |           |                                                                                                                                                                                                                                                                                                                                                      |                                                                                                                                                  |
|-----------------------------------------------|--------------------------|-------------------------|----|----------|-----|--------------------------------------------------------------------------|-----------------------------------------------------------------------------------------------------------------------------------------------------------------------------------------------------------------------------------------------------------------------------------------------------------------|-------------------|-----------|------------------------------------------------------------------------------------------------------------------------------------------------------------------------------------------------------------------------------------------------------------------------------------------------------------------------------------------------------|--------------------------------------------------------------------------------------------------------------------------------------------------|
|                                               |                          |                         |    |          |     |                                                                          |                                                                                                                                                                                                                                                                                                                 |                   |           | being and daily activities indicating better condition and higher scores on symptoms reflecting intense symptoms)                                                                                                                                                                                                                                    | <ul style="list-style-type: none"> <li>• Before RT</li> <li>• After RT</li> </ul>                                                                |
|                                               |                          |                         |    |          |     |                                                                          |                                                                                                                                                                                                                                                                                                                 |                   |           | EORTC QLQ-C30                                                                                                                                                                                                                                                                                                                                        |                                                                                                                                                  |
| Park et al (2013) <sup>33</sup> , South Korea | Descriptive longitudinal | Median 69 (range 65-82) | 66 | 66 (100) | 9.1 | Non-small-cell lung carcinoma (completely resected stage Ib, II or IIIa) | NP:<br>Cisplatin 80mg/m <sup>2</sup> on day 1, vinorelbine 25mg/m <sup>2</sup> on days 1 and 8 at 3-week interval for 4 cycles (n=30, 45.5%)<br><br>or<br><br>PC:<br>Carboplatin, paclitaxel 175mg/m <sup>2</sup> on day 1 at 3-week interval for 4 cycles (n=36, 54.5%)<br><br>(at the physician's discretion) | ECOG Co-morbidity | NCI CTCAE | EORTC QLQ-C30<br><br>EORTC QLQ-LC13 <sup>43</sup> (13 items – lung cancer related symptoms, treatment-related adverse effects and the use of pain medication; all items and scale scores are transformed to a 0–100 scale, with higher scores of functioning indicating greater functioning and higher scores on symptoms reflecting worse symptoms) | <ul style="list-style-type: none"> <li>• Before 1<sup>st</sup> dose of CT at each cycle</li> <li>• 1 month after 4<sup>th</sup> cycle</li> </ul> |

^Higher scores indicating better quality of life unless specified otherwise; \* Quality of life is the secondary endpoint if indicated

Abbreviations:  
BCQ, Breast Cancer Chemotherapy Questionnaire; CGA, Comprehensive Geriatric Assessment; CT, chemotherapy; EORTC QLQ-C30, European Organization for Research and Treatment of Cancer QLQ-C30 general questionnaire; EORTC QLQ-BR23, European Organization for Research and Treatment of Cancer specific module for breast cancer; EORTC QLQ-BN20, European Organization for Research and Treatment of Cancer specific module for brain cancer; EORTC QLQ-LC13, European Organization for Research and Treatment of Cancer for lung-specific questionnaire; FACT-B, Functional Assessment of Cancer Therapy- Breast cancer; NR, not reported; QoL, quality of life; PACIS, Perceived adjustment to chronic illness scale; RCT, randomized controlled trial; RT, radiotherapy; SF-36, 36-item short-form survey

1  
2  
3 The sample size of participants 65 years of age or older was reported by 17 of the 18  
4 studies<sup>16-31,33</sup>; Caffo et al. (2003) did not separately report the number of participants 65 years  
5 of age and older.<sup>32</sup> The sample sizes ranged from 11 to 368 per study.<sup>16-31,33</sup> In all, these 17  
6 studies included 1,785 participants; 764 participants from RCTs and 1021 participants from  
7 non-RCTs.<sup>16-31,33</sup> Of these 1,785 participants, 1,633 completed the baseline QoL  
8 questionnaire; 671 participants from RCTs and 962 participants from non-RCTs. Furthermore,  
9 the baseline completion rates ranged from 64.7% to 100%. Where reported, the age range of  
10 the participants was 65 to 92 years.<sup>16,17,19,20,22,24-28,31-33</sup> Eleven studies included participants 80  
11 years of age and older.<sup>16,20,22,24,25,27,28,30-33</sup> As for the cancer diagnosis, eight studies included  
12 participants with breast cancer,<sup>16-23</sup> four studies focused on glioblastoma participants<sup>24-27</sup> and  
13 two studies considered participants with colon cancer.<sup>30-31</sup> We included one study each on  
14 mixed,<sup>28</sup> prostate,<sup>29</sup> cervical<sup>32</sup> and lung cancer<sup>33</sup> participants.

15  
16  
17  
18  
19  
20  
21  
22  
23  
24  
25  
26  
27  
28  
29  
30  
31  
32 The most frequently used QoL instrument was the European Organization for Research and  
33 Treatment of Cancer general questionnaire (EORTC QLQ-C30; 13 studies).<sup>16,17,21-29,30,31,33</sup>  
34  
35  
36  
37  
38  
39  
40  
41  
42  
43  
44  
45  
46  
47  
48  
49  
50  
51  
52  
53  
54  
55  
56  
57  
58  
59  
60  
Nine studies also used a disease-specific QoL instrument along with the EORTC QLQ-C30  
for breast,<sup>16,17,21-23</sup> brain<sup>24,25,27</sup> and lung<sup>33</sup> cancer populations. The follow-up QoL evaluation  
was conducted at various intervals during adjuvant therapy and the post-treatment period.  
Ten studies reported at least one QoL evaluation during adjuvant therapy,<sup>17-19,21-25,31,32</sup> and  
five evaluated QoL immediately after the completion of adjuvant therapy.<sup>20-22,28,29</sup> The timing  
of the QoL evaluation after adjuvant therapy ranged from 1 month after treatment to 24  
months after the first day of adjuvant therapy. Ten studies followed participants for 6 months  
or less after the completion of adjuvant therapy.<sup>16,17,19,20,22,25,29-31,33</sup> Two studies included a  
QoL evaluation of 24 months after the first day of chemotherapy.<sup>18,21</sup>



1  
2  
3 The geriatric domains of functional status and/or co-morbidities at baseline were examined  
4 and reported in 14 studies.<sup>16-18,20,21-27,29,31,33</sup> As shown in Table 2, two studies reported the  
5 mean score of the Karnofsky Performance Scale (KPS) as 90 or above,<sup>16,29</sup> whereas three  
6 reported the median score of the KPS as 70 or above at baseline.<sup>25-27</sup> A KPS score of less than  
7 70 was used as a cut-off for the recruitment criterion in one study.<sup>24</sup> Co-morbid conditions  
8 were reported in eight studies<sup>16,17,20,21,23,26,31,33</sup>; six of these involved participants with a  
9 limiting co-morbidity or with three or more co-morbidities.<sup>16,17,21,23,31,33</sup> Twelve studies  
10 measured cancer therapy-related toxicity during adjuvant therapy,<sup>16,18-21,23-26,31-33</sup> and nine of  
11 these used National Cancer Institute's Common Terminology Criteria for Adverse  
12 Events.<sup>16,20,21,23-26,31,33</sup> With respect to haematological toxicity, two studies reported grade 3  
13 or 4 toxicity in fewer than 10% of participants,<sup>18,31</sup> and five reported such toxicity in 25% or  
14 higher during adjuvant chemotherapy or concomitant radiotherapy and  
15 chemotherapy.<sup>20,23,24,26,33</sup> With respect to non-haematological toxicity, a study reported grade  
16 3 or 4 toxicity in fewer than 10% of participants,<sup>18</sup> and four reported such toxicity in 25% or  
17 higher during adjuvant chemotherapy or concomitant radiotherapy and  
18 chemotherapy.<sup>20,23,26,31</sup> (Table 2)  
19  
20  
21  
22  
23  
24  
25  
26  
27  
28  
29  
30  
31  
32  
33  
34  
35  
36  
37  
38  
39  
40  
41  
42  
43  
44  
45  
46  
47  
48  
49  
50  
51  
52  
53  
54  
55  
56  
57  
58  
59  
60

Table 2. Summary of the main findings of QoL

| Study         | Functional status at baseline<br><br><i>(Functional status during adjuvant therapy if reported)</i>                                                                | Co-morbid condition at baseline                 | Toxicity/Adverse effect                                                                                                 | Supportive care where reported | Global or overall QoL scores (scale range)    | Global or overall QoL scores              |                 |                                                            |                                                                                                                                                                                                                                                                                                                                                                                                                                                                                                                                        | Findings of global or overall QoL<br><br><i>(Other QoL domains/subscales if reported)</i>                                                                                                                    | Authors' conclusions |
|---------------|--------------------------------------------------------------------------------------------------------------------------------------------------------------------|-------------------------------------------------|-------------------------------------------------------------------------------------------------------------------------|--------------------------------|-----------------------------------------------|-------------------------------------------|-----------------|------------------------------------------------------------|----------------------------------------------------------------------------------------------------------------------------------------------------------------------------------------------------------------------------------------------------------------------------------------------------------------------------------------------------------------------------------------------------------------------------------------------------------------------------------------------------------------------------------------|--------------------------------------------------------------------------------------------------------------------------------------------------------------------------------------------------------------|----------------------|
|               |                                                                                                                                                                    |                                                 |                                                                                                                         |                                |                                               | Adjuvant chemotherapy and/or radiotherapy |                 |                                                            |                                                                                                                                                                                                                                                                                                                                                                                                                                                                                                                                        |                                                                                                                                                                                                              |                      |
|               |                                                                                                                                                                    |                                                 |                                                                                                                         |                                |                                               | Baseline                                  | In the middle   | At the time of completion                                  | Follow-up period                                                                                                                                                                                                                                                                                                                                                                                                                                                                                                                       |                                                                                                                                                                                                              |                      |
|               |                                                                                                                                                                    |                                                 |                                                                                                                         |                                |                                               | Mean ± SD<br>No. of participants          |                 |                                                            |                                                                                                                                                                                                                                                                                                                                                                                                                                                                                                                                        |                                                                                                                                                                                                              |                      |
| Arraras 2008a | KPS mean 94.9<br><br><i>During therapy: KPS decreased from baseline to last dose of RT (mean difference 4.7 [0-100] but returned to baseline 6 weeks after RT)</i> | Limiting co-morbidity 62.5%                     | At last day of RT: Levels 2-3 skin toxicity 8.4%<br>Level 2 dysphagia 4.2%<br>Level 2 fatigue 4.2%<br>Level 2 pain 2.1% | NR                             | Global HQoL (0 – 100)<br><br>59.5 ±12<br>n=48 | 56.4 ± 11.2<br>n=48                       | 61 ± 22<br>n=32 | 66.5 ±14.8 (6 weeks after RT)<br>n=46                      | <ul style="list-style-type: none"> <li>†Global QoL improved significantly from baseline to final evaluation</li> </ul><br><i>Subscales</i> <ul style="list-style-type: none"> <li>†Significant worsening in physical and role functioning, and fatigue, pain, and breast symptoms in last day of RT but improved at 6 weeks after RT (final evaluation)</li> </ul>                                                                                                                                                                     | <ul style="list-style-type: none"> <li>• QoL data indicates RT was well tolerated by elderly women with localized breast cancer</li> </ul>                                                                   |                      |
| Browall 2008  | NR                                                                                                                                                                 | 1 or 2 co-morbidity 61%<br>≥3 co-morbidities 3% | NR                                                                                                                      | NR                             | Global HQoL (0 – 100)<br><br>76 ± 20<br>n=39  | 60 ± 23<br>n=35                           | 61 ± 22<br>n=32 | 70 ± 24 (4 months after CT & about 7 wks after RT)<br>n=30 | <ul style="list-style-type: none"> <li>†Global QoL decreased significantly from baseline to mid-treatment and last dose of CT. The decrease in global health status had not fully recovered to baseline level at 4 months post-CT</li> </ul><br><i>Subscales</i> <ul style="list-style-type: none"> <li>†Physical, role, social and cognitive functioning decreased significantly from baseline to last dose of CT</li> <li>• The decrease in physical and role functioning had not fully recovered to baseline levels at 4</li> </ul> | <ul style="list-style-type: none"> <li>• There was a significant decrease in global QoL, body image, physical &amp; role functioning during and after CT, but the decrease was independent of age</li> </ul> |                      |

1  
2  
3  
4  
5  
6  
7  
8  
9  
10  
11  
12  
13  
14  
15  
16  
17  
18  
19  
20  
21  
22  
23  
24  
25  
26  
27  
28  
29  
30  
31  
32  
33  
34  
35  
36  
37  
38  
39  
40  
41  
42  
43  
44  
45  
46  
47  
48  
49

months post-CT

• No significant change in future perspective, emotional and sexual functioning over time

|                 |                                         |                                                                                            |                                                                                                                                                            |    |                                                                                                  |                                 |                                                                                                                            |                                                                                                                                                                                                                                                |                                                                                                                                                                                                                                                                                                                                                                                             |
|-----------------|-----------------------------------------|--------------------------------------------------------------------------------------------|------------------------------------------------------------------------------------------------------------------------------------------------------------|----|--------------------------------------------------------------------------------------------------|---------------------------------|----------------------------------------------------------------------------------------------------------------------------|------------------------------------------------------------------------------------------------------------------------------------------------------------------------------------------------------------------------------------------------|---------------------------------------------------------------------------------------------------------------------------------------------------------------------------------------------------------------------------------------------------------------------------------------------------------------------------------------------------------------------------------------------|
| Crivellari 2000 | ECOG ≤2 for participants to be eligible | No specific data reported for those 58 participants who completed baseline QoL measurement | Grade 3 haematological toxicity 9.2%<br>Other grade 3 toxicity 6.6%                                                                                        | NR | Perceived adjustment to chronic illness QoL (0 – 100)<br><br>Median 59 n=58 (CMF plus tamoxifen) | Median 68 n=55                  | Median 82 (18 months after 1 <sup>st</sup> day of CT) n=55                                                                 | <ul style="list-style-type: none"> <li>• QoL improved progressively across study points (within CMF plus tamoxifen group)</li> </ul>                                                                                                           | <ul style="list-style-type: none"> <li>• Adding CMF to tamoxifen provided little survival benefits for the older patients, and patients continued to report more effort to cope (low QoL) in the tamoxifen plus CMF group compared with the tamoxifen alone group across time</li> <li>• CMF tolerability and effectiveness were reduced for elderly patients with breast cancer</li> </ul> |
| Dees 2000       | NR                                      | NR                                                                                         | Neutropaenic complications and alteration in cardiac function were not significantly age related, no clinically significant age related trends in toxicity |    | Overall QoL (0 – 10)<br><br>7.65 ± 0.88 n=11                                                     | 6.63 ± 1.48 n=7                 | <i>(authors mentioned to collect data at 2 and 6 months after completing CT, but they did not report the results/data)</i> | <ul style="list-style-type: none"> <li>• Overall QoL decreased from baseline to last dose of CT but not significant</li> </ul>                                                                                                                 | <ul style="list-style-type: none"> <li>• There was no evidence of decline QoL in older breast cancer patients treated with adjuvant AC compared with younger ones</li> </ul>                                                                                                                                                                                                                |
| Hurria 2006     | NR                                      | CCI mean 3                                                                                 | Grade 3 or 4 haematological toxicity 27%<br>Grade 3 or 4 non-haematological toxicity 31%                                                                   | NR | Overall HQoL (0 – 148)<br><br>116 (no information on SD) n=49                                    | 116 (no information on SD) n=49 | 119 (no information on SD) (6 months post CT) n=48                                                                         | <ul style="list-style-type: none"> <li>• No significant longitudinal change in overall QoL across all time points</li> </ul> <p><i>Subscales</i></p> <ul style="list-style-type: none"> <li>• No significant longitudinal change in</li> </ul> | <ul style="list-style-type: none"> <li>• Despite about half of patients experiencing grade 3 or 4 toxicity, from the perspective of QoL and functional outcomes, women</li> </ul>                                                                                                                                                                                                           |

|                |                                                                           |                                                                                                      |                                                                                                                   |    |                                                                                                                 |                                                                                     |                                                                                     |                                                                                                                                                                                                                                                                                                                                                             |                                                                                                                                                                                                                                                                                                                                                                                                                                                                                            |                                                                                                                                                                                                                                                                                                                                                 |
|----------------|---------------------------------------------------------------------------|------------------------------------------------------------------------------------------------------|-------------------------------------------------------------------------------------------------------------------|----|-----------------------------------------------------------------------------------------------------------------|-------------------------------------------------------------------------------------|-------------------------------------------------------------------------------------|-------------------------------------------------------------------------------------------------------------------------------------------------------------------------------------------------------------------------------------------------------------------------------------------------------------------------------------------------------------|--------------------------------------------------------------------------------------------------------------------------------------------------------------------------------------------------------------------------------------------------------------------------------------------------------------------------------------------------------------------------------------------------------------------------------------------------------------------------------------------|-------------------------------------------------------------------------------------------------------------------------------------------------------------------------------------------------------------------------------------------------------------------------------------------------------------------------------------------------|
|                |                                                                           |                                                                                                      |                                                                                                                   |    |                                                                                                                 |                                                                                     |                                                                                     |                                                                                                                                                                                                                                                                                                                                                             | physical, social, emotional and functional well-being across all time points                                                                                                                                                                                                                                                                                                                                                                                                               | tolerated adjuvant CT with no decline in QoL, functional status (patients maintained their baseline ability to perform ADLs & IADLs), comorbid or psychological status                                                                                                                                                                          |
| Kornblith 2011 | ECOG 0-2 for participants to be eligible<br>Grade 0-1, 96%<br>Grade 2, 4% | 0 co-morbidity 4.9%<br>1 co-morbidity 11.4%<br>2-3 co-morbidities 21.1%<br>4-10 co-morbidities 16.3% | Participants treated with capecitabine has significantly fewer adverse effects during and at the completion of CT | NR | Global QoL (0 – 100)<br><br>75.4 ± 18.3<br>n=170<br>(standard CT)<br><br>76.5 ± 18.7<br>n=156<br>(capecitabine) | 63.1 ± 18.4<br>n=150<br>(standard CT)<br><br>73.1 ± 17.6<br>n=137<br>(capecitabine) | 63.2 ± 17.3<br>n=153<br>(standard CT)<br><br>75.8 ± 17.5<br>n=136<br>(capecitabine) | 78.8 ± 17.8<br>n=141<br>(standard CT) (12 months post-CT)<br><br>77.4 ± 17.6<br>n=137<br>(standard CT) (18 months post-CT)<br><br>77.2 ± 17.6<br>n=137<br>(standard CT) (24 months post-CT)<br><br>77.3 ± 18.0<br>n=127<br>(capecitabine) (12 months post-CT)<br><br>78.2 ± 17.1<br>n=114<br>(capecitabine) (18 months post-CT)<br><br>76.5 ± 17.7<br>n=109 | <ul style="list-style-type: none"> <li>• Global QoL decreased across all time points within group but no information of p-value</li> <li>• (Participants treated with capecitabine had significantly better global QoL, role and social functioning, less fatigue, less nausea and vomiting, less constipation, and better appetite, and less psychological distress than standard CT group. This difference had resolved by 12 months with no further difference at 24 months)</li> </ul> | <ul style="list-style-type: none"> <li>• As reported in the original study, standard CT was associated with a significant improvement in relapse-free survival and overall survival compared with capecitabine</li> <li>• The short period of poorer QoL with standard CT is a modest price to pay for a chance at improved survival</li> </ul> |

1  
2  
3  
4  
5  
6  
7  
8  
9  
10  
11  
12  
13  
14  
15  
16  
17  
18  
19  
20  
21  
22  
23  
24  
25  
26  
27  
28  
29  
30  
31  
32  
33  
34  
35  
36  
37  
38  
39  
40  
41  
42  
43  
44  
45  
46  
47  
48  
49

(capecitabine) (24 months post-CT)

|              |                                                                                                                                                |                                                                |                                                                                                                                                                                                                         |                                                                                                                                                  |                                             |                                  |                 |                                       |                                                                                                                                                                                                                                                                                                                                                                                                                                                                                                                                                                                                                                                                                                                                           |                                                                                                                                                                                                                                                                                                                                  |
|--------------|------------------------------------------------------------------------------------------------------------------------------------------------|----------------------------------------------------------------|-------------------------------------------------------------------------------------------------------------------------------------------------------------------------------------------------------------------------|--------------------------------------------------------------------------------------------------------------------------------------------------|---------------------------------------------|----------------------------------|-----------------|---------------------------------------|-------------------------------------------------------------------------------------------------------------------------------------------------------------------------------------------------------------------------------------------------------------------------------------------------------------------------------------------------------------------------------------------------------------------------------------------------------------------------------------------------------------------------------------------------------------------------------------------------------------------------------------------------------------------------------------------------------------------------------------------|----------------------------------------------------------------------------------------------------------------------------------------------------------------------------------------------------------------------------------------------------------------------------------------------------------------------------------|
| Watters 2003 | Baseline KPS - NR<br><br><i>During therapy: KPS declined during and by the completion of CT, but did not differ from baseline at follow-up</i> | NR                                                             | NR                                                                                                                                                                                                                      | NR                                                                                                                                               | Global QoL (0 – 100)<br><br>78 ± 16<br>n=20 | 77 ± 14<br>n=20                  | 66 ± 20<br>n=20 | 73 ± 22<br>(6 months post-CT)<br>n=20 | <ul style="list-style-type: none"> <li>†Global QoL decreased significantly from baseline to the time of completion of CT but improved at 6 months post-CT</li> </ul> <p><i>Subscales</i></p> <ul style="list-style-type: none"> <li>†Role and social functioning decreased significantly from baseline to the time of completion of CT but improved at 6 months post-CT</li> </ul>                                                                                                                                                                                                                                                                                                                                                        | <ul style="list-style-type: none"> <li>Selected older women tolerated anthracycline-based adjuvant CT for breast cancer well</li> </ul>                                                                                                                                                                                          |
| Perrone 2015 | ECOG Grade 0, 83%<br>Grade 1, 17%                                                                                                              | No comorbidity 60%<br>1 comorbidity 31%<br>≥2 comorbidities 8% | Severe (grade >2) haematological toxicity was suffered by 70% of participants with CMF and 9% with docetaxel, while severe non-haematological toxicity was reported in 19% participants with CMF and 28% with docetaxel | G-CSF & erythropoietin were used according to standard guidelines. G-CSF was also recommended for prophylaxis when grade ≥2 neutropenia occurred | No information on mean or median<br>n=252   | No information on mean or median |                 |                                       | <ul style="list-style-type: none"> <li>Global QoL decreased from baseline to mid-treatment in both standard CMF and docetaxel groups but between group difference was not significant. No information on within group difference.</li> </ul> <p><i>Subscales</i></p> <ul style="list-style-type: none"> <li>Physical, role, social and cognitive functioning decreased from baseline to mid-treatment in both standard CMF and docetaxel groups but between group differences were not significant. No information on within group difference.</li> </ul> <ul style="list-style-type: none"> <li>(A statistically significant worsening with docetaxel was found for systemic therapy side-effects, future perspective, nausea</li> </ul> | <ul style="list-style-type: none"> <li>There was no significant interaction of treatment arms &amp; geriatric scales measuring patients' ability or comorbidities</li> <li>Docetaxel is not superior to standard CMF in survival. Docetaxel worsens several QoL subscales and causes more non-haematological toxicity</li> </ul> |

& vomiting, diarrhea, appetite loss, upset by hair loss & body image domains)

|                                                                                                                |                    |                                                                                                                                    |                                                      |                                                                                                                                                                     |                                   |                                                                      |                                          |                                           |                                                                                                                                                                                                                                                                                                                                                                                                            |                                                                                                                                                                                                                                                                                                                                                                   |
|----------------------------------------------------------------------------------------------------------------|--------------------|------------------------------------------------------------------------------------------------------------------------------------|------------------------------------------------------|---------------------------------------------------------------------------------------------------------------------------------------------------------------------|-----------------------------------|----------------------------------------------------------------------|------------------------------------------|-------------------------------------------|------------------------------------------------------------------------------------------------------------------------------------------------------------------------------------------------------------------------------------------------------------------------------------------------------------------------------------------------------------------------------------------------------------|-------------------------------------------------------------------------------------------------------------------------------------------------------------------------------------------------------------------------------------------------------------------------------------------------------------------------------------------------------------------|
| 1<br>2<br>3<br>4<br>5<br>6<br>7<br>8<br>9<br>10<br>11<br>12<br>13<br>14<br>15<br>16<br>17<br>18<br>19          | Gallego 2011       | Baseline: KPS <70 for participants to be eligible<br><br>During therapy: 33% improved their KPS by ≥10, before disease progression | NR                                                   | Grade 3 or 4 haematological toxicity 25%<br><br>Most adverse events were mild or moderate<br><br>According to MMSE, Patient's cognitive function improved over time | NR                                | No information on mean or median<br>n=59                             | 1.4 points increase per month<br>n=35    |                                           | <ul style="list-style-type: none"> <li>• †Global QoL improved significantly over time</li> </ul> <p><i>Subscales</i></p> <ul style="list-style-type: none"> <li>• †Physical, role, cognitive and social functioning scores improved significantly over time</li> <li>• For QLQ-BN20, scores on motor dysfunction, drowsiness, and bladder control improved over time before disease progression</li> </ul> | <ul style="list-style-type: none"> <li>• Temozolomide was generally well tolerated</li> <li>• Temozolomide appears to increase survival, and is associated with a significant improvement of QoL and functional status before tumor progression</li> </ul>                                                                                                        |
| 20<br>21<br>22<br>23<br>24<br>25<br>26<br>27<br>28<br>29<br>30<br>31<br>32<br>33<br>34<br>35<br>36<br>37<br>38 | Keime-Guibert 2007 | Baseline KPS ≥70 for participants to be eligible<br><br>During therapy: KPS declined over time                                     | NR                                                   | No severe adverse effects related to RT<br><br>Corticosteroids and anticonvulsant agents, physical and psychological support, management by a palliative care team  |                                   | Global QoL (0 – 100)<br>62.9 ± 3.4<br>n=35<br>(supportive care + RT) | 55.6 ± 3.9<br>n=NR                       | 58.8 ± 4.5<br>(~3 months post-RT)<br>n=26 | <ul style="list-style-type: none"> <li>• Global QoL did not deteriorate significantly over time (supportive care + RT)</li> </ul> <p><i>Subscales</i></p> <ul style="list-style-type: none"> <li>• †During and after treatment, scores were significantly worse over time on physical, cognitive and social functioning, and fatigue and motor dysfunction</li> </ul>                                      | <ul style="list-style-type: none"> <li>• Supportive care + RT was superior to supportive alone in survival benefit. Global assessment of deterioration of QoL over time did not differ significantly between supportive care + RT group and supportive care group alone</li> <li>• RT results in a modest improvement in survival without reducing QoL</li> </ul> |
| 39<br>40<br>41<br>42<br>43<br>44<br>45<br>46<br>47<br>48<br>49                                                 | Minniti 2009       | Baseline: KPS ≥60 for participants to be eligible                                                                                  | Diabetes 19% out of 43<br>Hypertension 33% out of 43 | Grade 2-3 confusion and/or somnolence during or after RT                                                                                                            | Anticonvulsants and dexamethasone | Global QoL (0 – 100)<br>58.3 ± 3.7                                   | 54.3 ± 5.1<br>(completion of RT)<br>n=36 |                                           | <ul style="list-style-type: none"> <li>• Score of global health status did not change significantly</li> </ul>                                                                                                                                                                                                                                                                                             | <ul style="list-style-type: none"> <li>• Temozolomide is well tolerated.</li> <li>• The association of</li> </ul>                                                                                                                                                                                                                                                 |

|    |              |                         |                 |                    |      |            |              |  |  |  |
|----|--------------|-------------------------|-----------------|--------------------|------|------------|--------------|--|--|--|
| 1  |              |                         |                 |                    |      |            |              |  |  |  |
| 2  |              | KPS median 70           | Cardiovascular  | 14% out of 43      | n=36 |            |              |  |  |  |
| 3  |              | <i>KPS did not</i>      | disease 16% out | Grade 3-4          |      |            |              |  |  |  |
| 4  |              | <i>change</i>           | of 43           | haematological     |      |            |              |  |  |  |
| 5  |              | <i>significantly</i>    |                 | during CT 28%      |      |            |              |  |  |  |
| 6  |              | <i>during the study</i> |                 | out of 43 (which   |      |            |              |  |  |  |
| 7  |              | <i>period</i>           |                 | led to the early   |      |            |              |  |  |  |
| 8  |              |                         |                 | discontinuation of |      |            |              |  |  |  |
| 9  |              |                         |                 | CT in half of      |      |            |              |  |  |  |
| 10 |              |                         |                 | participants)      |      |            |              |  |  |  |
| 11 |              |                         |                 | Moderate-severe    |      |            |              |  |  |  |
| 12 |              |                         |                 | fatigue 35% out    |      |            |              |  |  |  |
| 13 |              |                         |                 | of 43, nausea 10%  |      |            |              |  |  |  |
| 14 |              |                         |                 | out of 43,         |      |            |              |  |  |  |
| 15 |              |                         |                 | constipation 22%   |      |            |              |  |  |  |
| 16 |              |                         |                 | out of 43, skin    |      |            |              |  |  |  |
| 17 |              |                         |                 | rash 9% out of 43  |      |            |              |  |  |  |
| 18 | Minniti 2013 | KPS $\geq 60$ for       | NR              | NR                 | NR   | Global QoL | 60.0 (no     |  |  |  |
| 19 |              | participants to be      |                 |                    |      | (0 – 100)  | information  |  |  |  |
| 20 |              | eligible                |                 |                    |      |            | on SD)       |  |  |  |
| 21 |              | KPS median 70           |                 |                    |      |            | (1 month     |  |  |  |
| 22 |              |                         |                 |                    |      |            | after RT and |  |  |  |
| 23 |              |                         |                 |                    |      |            | concomitant  |  |  |  |
| 24 |              |                         |                 |                    |      |            | temozolomi   |  |  |  |
| 25 |              |                         |                 |                    |      |            | de)          |  |  |  |
| 26 |              |                         |                 |                    |      |            | n=53         |  |  |  |
| 27 |              |                         |                 |                    |      |            |              |  |  |  |
| 28 |              |                         |                 |                    |      |            | 72.0 (no     |  |  |  |
| 29 |              |                         |                 |                    |      |            | information  |  |  |  |
| 30 |              |                         |                 |                    |      |            | on SD)       |  |  |  |
| 31 |              |                         |                 |                    |      |            | (6 month     |  |  |  |
| 32 |              |                         |                 |                    |      |            | from the     |  |  |  |
| 33 |              |                         |                 |                    |      |            | start of RT) |  |  |  |
| 34 |              |                         |                 |                    |      |            | n=27         |  |  |  |
| 35 |              |                         |                 |                    |      |            |              |  |  |  |
| 36 |              |                         |                 |                    |      |            |              |  |  |  |
| 37 |              |                         |                 |                    |      |            |              |  |  |  |
| 38 |              |                         |                 |                    |      |            |              |  |  |  |
| 39 |              |                         |                 |                    |      |            |              |  |  |  |
| 40 |              |                         |                 |                    |      |            |              |  |  |  |
| 41 |              |                         |                 |                    |      |            |              |  |  |  |
| 42 |              |                         |                 |                    |      |            |              |  |  |  |
| 43 |              |                         |                 |                    |      |            |              |  |  |  |
| 44 |              |                         |                 |                    |      |            |              |  |  |  |
| 45 |              |                         |                 |                    |      |            |              |  |  |  |
| 46 |              |                         |                 |                    |      |            |              |  |  |  |
| 47 |              |                         |                 |                    |      |            |              |  |  |  |
| 48 |              |                         |                 |                    |      |            |              |  |  |  |
| 49 |              |                         |                 |                    |      |            |              |  |  |  |

|               |                                                           |                                                 |                                                               |    |                                                               |                                  |                                                             |                                                                                                                                                                                                                                                                                                                                                                                                                                                                                                                            |                                                                                                                                                                                                                                    |
|---------------|-----------------------------------------------------------|-------------------------------------------------|---------------------------------------------------------------|----|---------------------------------------------------------------|----------------------------------|-------------------------------------------------------------|----------------------------------------------------------------------------------------------------------------------------------------------------------------------------------------------------------------------------------------------------------------------------------------------------------------------------------------------------------------------------------------------------------------------------------------------------------------------------------------------------------------------------|------------------------------------------------------------------------------------------------------------------------------------------------------------------------------------------------------------------------------------|
|               |                                                           |                                                 |                                                               |    |                                                               |                                  |                                                             |                                                                                                                                                                                                                                                                                                                                                                                                                                                                                                                            | severity of fatigue and distress significantly increased over the course of RT                                                                                                                                                     |
| Arraras 2008b | KPS mean 96.1                                             | NR                                              | NR                                                            | NR | Global QoL (0 – 100)<br><br>66.8 ± 17.9<br>n=137              | 66.7 ± 20.9<br>n=132             | 71.3 ± 18.6<br>(1.5 months after completion of RT)<br>n=126 | <ul style="list-style-type: none"> <li>• No change in global QoL score from baseline to last dose of RT but significantly improved from last dose to 1.5 months after RT</li> </ul> <p><i>Subscales</i></p> <ul style="list-style-type: none"> <li>• †There was a significant worsening of physical, cognitive and social functioning from baseline to last dose of RT, but physical functioning improved significantly from last dose to 1.5 months after RT</li> </ul>                                                   | <ul style="list-style-type: none"> <li>• There was a tendency to a worsening of QoL at the end of the treatment, with a recovery in most scales in the follow-up measurement that could be due to RT low toxicity level</li> </ul> |
| Bouvier 2008  | NR                                                        | NR                                              | NR                                                            | NR | Global QoL (0 – 100)<br><br>60 (no information of SD)<br>n=11 | No information on mean or median | No information on mean or median                            | <ul style="list-style-type: none"> <li>• Graph shows the mean scores of global QoL increased over time, but no information about the <i>p</i> value</li> </ul> <p><i>Subscales</i></p> <ul style="list-style-type: none"> <li>• †The overall mean score for physical functioning was significantly higher for participants treated with CT than untreated patients regardless of follow-up period. Emotional functioning were found to significantly increase between at diagnosis and 6 months after diagnosis</li> </ul> | <ul style="list-style-type: none"> <li>• Global QoL for patients with stage III colon cancer treated with adjuvant CT did not vary significantly from that of patients who did not receive CT across time</li> </ul>               |
| Chang 2012    | ECOG<br>Grade 0, 4.9%<br>Grade 1, 63.4%<br>Grade 2, 31.7% | CACI<br>≤7, 75.6%<br>≥8, 24.4%<br>(data for the | Grade 3 or 4 haematological toxicity <1%<br>Grade 3 hand-foot | NR | Global QoL (0 – 100)<br><br>59 (no                            | No information on mean or median | No information on mean or median                            | <ul style="list-style-type: none"> <li>• No significant worsening of global QoL during CT</li> </ul> <p><i>Subscales</i></p>                                                                                                                                                                                                                                                                                                                                                                                               | <ul style="list-style-type: none"> <li>• By using a tailored-dose escalation strategy, unnecessary dose</li> </ul>                                                                                                                 |



1  
2  
3  
4  
5  
6  
7  
8  
9  
10  
11  
12  
13  
14  
15  
16  
17  
18  
19  
20  
21  
22  
23  
24  
25  
26  
27  
28  
29  
30  
31  
32  
33  
34  
35  
36  
37  
38  
39  
40  
41  
42  
43  
44  
45  
46  
47  
48  
49

(data for the original sample of 82)

original sample of 82)

syndrome 25.6% (data for the original sample of 82)

information of SD) n=57

(3-6 months after completion of CT) n=48

- No significant worsening of functional QoL during CT
- A slight and insignificant deterioration in social and cognitive functioning at 3 months during CT but recovered over time
- No symptoms were significantly exacerbated during therapy

reduction could be avoided without an increment of toxic effects in patients receiving capecitabine. The toxicity profiles were favorable.

Compromised QoL after surgery was not worsened by adjuvant capecitabine and improved after the completion of CT

|            |                                          |                                                    |                                                                           |                                                                                                                                                                                 |                                                               |                                                                           |                                                                           |                                                                                                                                                                                                                 |                                                                               |
|------------|------------------------------------------|----------------------------------------------------|---------------------------------------------------------------------------|---------------------------------------------------------------------------------------------------------------------------------------------------------------------------------|---------------------------------------------------------------|---------------------------------------------------------------------------|---------------------------------------------------------------------------|-----------------------------------------------------------------------------------------------------------------------------------------------------------------------------------------------------------------|-------------------------------------------------------------------------------|
| Caffo 2003 | NR                                       | NR                                                 | The mean no. of daily stools progressively increased during the treatment | Participants experiencing grade 3-4 diarrhea were given loperamide with adequate water and saline support. If loperamide was ineffective, treatment with octreotide was planned | Overall QoL (Daily card) (1 – 4) (No data reported for EORTC) | 2.46 ± 0.67 n was not reported                                            | 2.55 ± 1.05 n was not reported                                            | <ul style="list-style-type: none"> <li>• Global QoL score improved progressively across study points, and from baseline to final evaluation (during RT), but no information about the <i>p</i> value</li> </ul> | • The authors' conclusion is not related to QoL                               |
| Park 2013  | ECOG 0-1 for participants to be eligible | 0 co-morbidity 71.2% Any comorbid conditions 28.8% | Grade 3 neutropaenia 39.4%, anaemia 4.5%, thrombocytopaenia 1.5%          | NR                                                                                                                                                                              | Global QoL (0 – 100)                                          | No information on mean or median (after 2 <sup>nd</sup> cycle of CT) n=66 | No information on mean or median (after 4 <sup>th</sup> cycle of CT) n=60 | • Global QoL did not significantly deteriorate over time                                                                                                                                                        | • Postoperative CT did not substantially reduce QoL in elderly NSCLC patients |

† Significant difference reported by the study authors (*p* < 0.05)

Abbreviations:

1  
2  
3  
4  
5  
6  
7  
8  
9  
10  
11  
12  
13  
14  
15  
16  
17  
18  
19  
20  
21  
22  
23  
24  
25  
26  
27  
28  
29  
30  
31  
32  
33  
34  
35  
36  
37  
38  
39  
40  
41  
42  
43  
44  
45  
46  
47  
48  
49

ADLs, Activities of Daily Living; BMI, Body Mass Index; BOMC, Blessed Orientation-Memory-Concentration test; CACI, Charlson-Age Comorbidity Index; CCI, Charlson Comorbidity Index; CT, chemotherapy; ECOG, Eastern Cooperative Oncology Group; GDS, Geriatric Depression Scale; IADLs, Instrumental Activities of Daily Living; MMSE, Mini-Mental State Examination; KPS, Karnofsky Performance Status Scale; NCI CTC, National Cancer Institute Common Toxicity Criteria; NR, not reported; OARS, Older American Resources and Services Questionnaire; RT, radiotherapy

For peer review only

### Methodological quality

Thirteen studies attained scores of 10 or higher (high quality),<sup>16-27,33</sup> three scored 7 to 9 (moderate quality),<sup>28,30,31</sup> and two scored 6 or lower (low quality).<sup>29,32</sup> The main methodological drawbacks of the included studies were the lack of determination of the prognostic factors for QoL (100%) and the lack of data on the time since diagnosis or treatment (77.8%) and the characteristics of non-responders (77.8%). (Table 3)

For peer review only

Table 3. Results of the methodological quality assessment

| Studies            | Sampling                                      |   | Selection of QoL instrument                                                    |   |   | Data collection process                                                                                                           |   | Response rate |   | Group comparison           |   | Clarity of reporting                      |                                           |   | Determination of prognostic factor QoL | Quality score |
|--------------------|-----------------------------------------------|---|--------------------------------------------------------------------------------|---|---|-----------------------------------------------------------------------------------------------------------------------------------|---|---------------|---|----------------------------|---|-------------------------------------------|-------------------------------------------|---|----------------------------------------|---------------|
|                    | B                                             | O | I                                                                              | C | M | G                                                                                                                                 | H | E             | A | D                          | F | J                                         | K                                         | L |                                        |               |
| Arraras 2008a      | 1                                             | 1 | 1                                                                              | 1 | 1 | 1                                                                                                                                 | 0 | 1             | 1 | 1                          | 0 | 1                                         | 1                                         | 0 | 11                                     |               |
| Rowell 2008        | 1                                             | 1 | 1                                                                              | 1 | 1 | 1                                                                                                                                 | 1 | 1             | 1 | 1                          | 0 | 1                                         | 1                                         | 0 | 12                                     |               |
| Crivellari 2000    | 1                                             | 1 | 0                                                                              | 1 | 1 | 1                                                                                                                                 | 0 | 1             | 1 | 1                          | 0 | 1                                         | 1                                         | 0 | 10                                     |               |
|                    |                                               |   | (PACIS)                                                                        |   |   |                                                                                                                                   |   |               |   |                            |   |                                           |                                           |   |                                        |               |
| Dees 2000          | 1                                             | 1 | 1                                                                              | 1 | 1 | 1                                                                                                                                 | 0 | 1             | 1 | 1                          | 0 | 0                                         | 1                                         | 0 | 10                                     |               |
| Curria 2006        | 1                                             | 1 | 1                                                                              | 1 | 1 | 1                                                                                                                                 | 0 | 1             | 1 | 1                          | 1 | 1                                         | 1                                         | 0 | 12                                     |               |
| Kornblith 2011     | 1                                             | 1 | 1                                                                              | 1 | 1 | 1                                                                                                                                 | 0 | 1             | 1 | 1                          | 0 | 0                                         | 1                                         | 0 | 10                                     |               |
| Watters 2003       | 1                                             | 1 | 1                                                                              | 1 | 1 | 1                                                                                                                                 | 0 | 1             | 1 | 1                          | 0 | 1                                         | 1                                         | 0 | 11                                     |               |
| Serrone 2015       | 1                                             | 1 | 1                                                                              | 1 | 1 | 1                                                                                                                                 | 1 | 1             | 1 | 1                          | 0 | 1                                         | 0                                         | 0 | 11                                     |               |
| Gallego 2011       | 1                                             | 1 | 1                                                                              | 1 | 1 | 1                                                                                                                                 | 0 | 1             | 1 | 1                          | 1 | 1                                         | 0                                         | 0 | 11                                     |               |
| Keime-Guibert 2007 | 1                                             | 1 | 1                                                                              | 0 | 1 | 1                                                                                                                                 | 0 | 1             | 1 | 1                          | 1 | 1                                         | 1                                         | 0 | 11                                     |               |
| Minniti 2009       | 1                                             | 1 | 1                                                                              | 1 | 1 | 1                                                                                                                                 | 0 | 1             | 1 | 1                          | 1 | 1                                         | 1                                         | 0 | 12                                     |               |
| Minniti 2013       | 1                                             | 1 | 1                                                                              | 1 | 1 | 1                                                                                                                                 | 1 | 1             | 1 | 1                          | 0 | 1                                         | 1                                         | 0 | 12                                     |               |
| Mohile 2011        | 1                                             | 1 | 0                                                                              | 1 | 0 | 1                                                                                                                                 | 0 | 1             | 1 | 1                          | 0 | 0                                         | 1                                         | 0 | 8                                      |               |
|                    |                                               |   | (MD Anderson Symptom Inventory)                                                |   |   |                                                                                                                                   |   |               |   |                            |   |                                           |                                           |   |                                        |               |
| Arraras 2008b      | 0                                             | 1 | 1                                                                              | 0 | 0 | 1                                                                                                                                 | 0 | 1             | 0 | 0                          | 0 | 1                                         | 1                                         | 0 | 6                                      |               |
| Bouvier 2008       | 0                                             | 1 | 1                                                                              | 1 | 0 | 0                                                                                                                                 | 0 | 1             | 1 | 0                          | 0 | 1                                         | 1                                         | 0 | 8                                      |               |
|                    | (only age and cancer diagnosis were reported) |   |                                                                                |   |   | (only among 30 respondents undergoing curative surgical resection for stage III cancer with 11 received adjuvant CT was reported) |   |               |   | (no information on dosage) |   | (only graphical information was reported) | (only graphical information was reported) |   |                                        |               |
| Chang 2012         | 1                                             | 1 | 1                                                                              | 1 | 0 | 1                                                                                                                                 | 0 | 1             | 1 | 1                          | 0 | 1                                         | 0                                         | 0 | 9                                      |               |
| Carro 2003         | 0                                             | 0 | 0                                                                              | 1 | 1 | 1                                                                                                                                 | 0 | 1             | 0 | 1                          | 0 | 0                                         | 1                                         | 0 | 6                                      |               |
|                    |                                               |   | (both diary care and EORTC-QLQ C30 were used but only diary data was reported) |   |   |                                                                                                                                   |   |               |   |                            |   |                                           |                                           |   |                                        |               |
| Clark 2013         | 1                                             | 1 | 1                                                                              | 1 | 1 | 1                                                                                                                                 | 0 | 1             | 1 | 1                          | 0 | 1                                         | 1                                         | 0 | 11                                     |               |
|                    |                                               |   |                                                                                |   |   |                                                                                                                                   |   |               |   |                            |   | (only)                                    | (only)                                    |   |                                        |               |

1  
2  
3  
4  
5  
6  
7  
8  
9  
10  
11  
12  
13  
14  
15  
16  
17  
18  
19  
20  
21  
22  
23  
24  
25  
26  
27  
28  
29  
30  
31  
32  
33  
34  
35  
36  
37  
38  
39  
40  
41  
42  
43  
44  
45  
46  
47  
48  
49

graphical  
information  
was reported)

graphical  
information  
was  
reported)

A= Socio-demographic and medical data is described (e.g. age, race, employment status, educational status, tumour stage at diagnosis etc.); B= Inclusion and/or exclusion criteria are formulated; C= The process of data collection is described (e.g., interview or self-report etc.); D= The type of cancer treatment is described; E= The results are compared between two groups or more (e.g., healthy population, groups with different cancer treatment or age, comparison with time at diagnosis etc.); F= Mean or median and range or standard deviation of time since diagnosis or treatment is given; G= Participation and response rates for patient groups have to be described and have to be more than 75%; H= Information is presented about patient/ disease characteristics of responders and non-responders or if there is no selective response; I= A standardized or valid quality of life questionnaire is used; J= Results are not only described for quality of life but also for the physical, psychological and social domain; K= Mean, median, standard deviations or percentages are reported for the most important outcome measures (HQoL); L= An attempt is made to find a set of determinants with the highest prognostic value (HQoL); M= Patient signed an informed consent form before study participation; N=No; O= The degree of selection of the patient sample is described

For peer review only

## Risk of bias

### *RCTs*

In all four RCTs, the risk of bias was low or unclear for most items but high for detection because of the subjective and self-reporting nature of the QoL assessment. One RCT did not blind the participants and staff and thus was judged to have a high risk of performance bias.<sup>18</sup> The remaining three RCTs did not report information on the blinding of participants and personnel to allow for a judgement of the performance bias.<sup>21,23,25</sup> We judged three RCTs to have an unclear risk of attrition bias because of the lack of explicit information on patients' lost to follow-up and missing data.<sup>18,21,25</sup> (Figure 2)

INSERT FIGURE 2 HERE

### *Non-RCTs*

Of the 14 non-RCTs, five studies were judged to have a low or moderate risk of bias for all domains,<sup>16,20,26,31,33</sup> and the other nine studies had a serious risk of bias in at least one domain.<sup>17,19,22,24,28-30,32</sup> The bias were observed mainly in the confounding, in the selection of participants for the study and in the measurement of outcomes. Although most of the studies measured some confounding factors (e.g., functional performance status or co-morbidity) at baseline, no stratification in the study design or adjustment in the data analysis was made to control their effects.<sup>16,17,20, 22-24,27,29,31,33</sup> Four non-RCTs did not measure functional performance status or co-morbidities at baseline.<sup>19,28,30,32</sup> The bias in the selection of participants was either moderate or serious in all the non-RCTs.<sup>16,17,19,20,22-24,27-33</sup> Only fit and functional elderly patients seemed to have been enrolled in these studies, and hence, the study cohorts might not be representative of the real world population. Like the RCTs, all 14 non-RCTs had a moderate-to-serious risk of bias in the measurement outcomes because of the

1  
2  
3  
4  
5  
6  
7  
8  
9  
10  
11  
12  
13  
14  
15  
16  
17  
18  
19  
20  
21  
22  
23  
24  
25  
26  
27  
28  
29  
30  
31  
32  
33  
34  
35  
36  
37  
38  
39  
40  
41  
42  
43  
44  
45  
46  
47  
48  
49  
50  
51  
52  
53  
54  
55  
56  
57  
58  
59  
60

subjective and self-reporting nature of the QoL assessment. The bias in the selection of reported results was unclear in all the non-RCTs because of unavailability of study protocols.

<sup>16,17,19,20,22-24,27-33</sup> (Table 4)

For peer review only

Table 4. Risk of bias summary for Non-RCTs (ROBINS-I)

| Studies       | Pre-intervention        |                                                  | At intervention                         |                                                    | Post-intervention        |                                 |                                          | Overall risk of bias                         |
|---------------|-------------------------|--------------------------------------------------|-----------------------------------------|----------------------------------------------------|--------------------------|---------------------------------|------------------------------------------|----------------------------------------------|
|               | Bias due to confounding | Bias in selection of participants into the study | Bias in classification of interventions | Bias due to deviations from intended interventions | Bias due to missing data | Bias in measurement of outcomes | Bias in selection of the reported result |                                              |
| Arraras 2008a | M                       | M                                                | M                                       | M                                                  | M                        | M                               | unclear                                  | Low or moderate risk if bias for all domains |
| Browall 2008  | M                       | M                                                | M                                       | S                                                  | M                        | M                               | unclear                                  | Serious risk of bias in at least one domain  |
| Dees 2000     | S                       | S                                                | L                                       | M                                                  | M                        | M                               | unclear                                  | Serious risk of bias in at least one domain  |
| Hurria 2006   | M                       | M                                                | L                                       | M                                                  | L                        | M                               | unclear                                  | Low or moderate risk if bias for all domains |
| Watters 2003  | S                       | M                                                | L                                       | M                                                  | L                        | M                               | unclear                                  | Serious risk of bias in at least one domain  |
| Gallego 2011  | M                       | M                                                | L                                       | M                                                  | S                        | S                               | unclear                                  | Serious risk of bias in at least one domain  |
| Minniti 2009  | M                       | M                                                | L                                       | M                                                  | L                        | M                               | unclear                                  | Low or moderate risk if bias for all domains |
| Minniti 2013  | M                       | M                                                | L                                       | M                                                  | S                        | M                               | unclear                                  | Serious risk of bias in at least one domain  |
| Mohile 2011   | S                       | M                                                | M                                       | unclear                                            | L                        | M                               | unclear                                  | Serious risk of bias in at least one domain  |
| Arraras 2008b | M                       | S                                                | unclear                                 | unclear                                            | M                        | M                               | unclear                                  | Serious risk of bias in at least one domain  |
| Bouvier 2008  | S                       | M                                                | unclear                                 | unclear                                            | L                        | M                               | unclear                                  | Serious risk of bias in at least one domain  |
| Chang 2012    | M                       | M                                                | L                                       | M                                                  | M                        | M                               | unclear                                  | Low or moderate risk if bias for all domains |
| Caffo 2003    | S                       | S                                                | L                                       | unclear                                            | M                        | M                               | unclear                                  | Serious risk of bias in at least one domain  |
| Park 2013     | M                       | M                                                | M                                       | M                                                  | M                        | M                               | unclear                                  | Low or moderate risk if bias for all domains |

L=low risk; M=moderate risk; S=serious risk; C=critical risk



1  
2  
3 QoL outcomes

4  
5 Breast cancer

6  
7 *EORTC QLQ-C30*

8  
9  
10 Three studies reported the global QoL scores at baseline, during chemotherapy, at the time of  
11 completion of chemotherapy and 4 to 12 months after the completion of chemotherapy.<sup>17,21,22</sup>

12  
13  
14 The participants in these studies were treated with the standard chemotherapy regimen for  
15 breast cancer, including an anthracycline-based, cyclophosphamide/ methotrexate/  
16 fluorouracil (CMF) or fluorouracil/ epirubicin/ cyclophosphamide regimen. In Kornblith et al.  
17  
18  
19  
20 (2011),<sup>21</sup> approximately half of the participants received capecitabine. Browall et al. (2008)  
21  
22 reported statistically significantly lower global QoL scores during (ES, 0.74) and  
23 immediately after the completion (ES, 0.71) of chemotherapy than at baseline and a non-  
24  
25  
26  
27  
28  
29  
30  
31  
32  
33  
34  
35  
36  
37  
38  
39  
40  
41  
42  
43  
44  
45  
46  
47  
48  
49  
50  
51  
52  
53  
54  
55  
56  
57  
58  
59  
60  
significantly decline in the global QoL score 4 months after chemotherapy.<sup>17</sup> Watters et al.  
(2003) also revealed a statistically significantly lower global QoL score immediately after the  
completion of chemotherapy (ES, 0.66) than at baseline and a non-significant decline in the  
global QoL scores during and 6 months after chemotherapy.<sup>22</sup> Browall et al. (2008) and  
Watters et al. (2003) also reported the domain scores, wherein statistically significantly lower  
scores in the role and social functioning domains were found immediately after the  
completion of chemotherapy than at baseline. No significant reductions in role and social  
well-being were reported during or 4 to 6 months after the completion of chemotherapy.<sup>17,22</sup>  
Emotion was the only domain that showed an improvement from baseline to the follow-up  
evaluations, with a statistically significantly higher score during chemotherapy. The domains  
of physical and cognitive functioning revealed no statistically significant differences across  
time.<sup>17,22</sup> In Kornblith et al. (2011), both standard chemotherapy and capecitabine groups  
showed a decline in the global QoL during and immediately after the completion of

1  
2  
3 chemotherapy, whereas an increase in the global QoL was reported from baseline to 12  
4  
5 months after the completion of chemotherapy.<sup>21</sup> (Tables 2 and 5)  
6  
7  
8  
9  
10  
11  
12  
13  
14  
15  
16  
17  
18  
19  
20  
21  
22  
23  
24  
25  
26  
27  
28  
29  
30  
31  
32  
33  
34  
35  
36  
37  
38  
39  
40  
41  
42  
43  
44  
45  
46  
47  
48  
49  
50  
51  
52  
53  
54  
55  
56  
57  
58  
59  
60

For peer review only

Table 5. Matrix of baseline and change of QoL scores, attrition rate, methodological quality score, and RoB

| <b>Type of cancer</b><br>Studies | QoL scale | Baseline                                         | From baseline to the middle of adjuvant CT/or RT        | From baseline to the time of completion of adjuvant CT/or RT | From baseline to post adjuvant CT/or RT follow-up period | Attrition (last follow-up) where reported (%) | Methodological quality | Overall risk of bias judgment for non-RCTs |
|----------------------------------|-----------|--------------------------------------------------|---------------------------------------------------------|--------------------------------------------------------------|----------------------------------------------------------|-----------------------------------------------|------------------------|--------------------------------------------|
| <b>Breast RCTs</b>               |           |                                                  |                                                         |                                                              |                                                          |                                               |                        |                                            |
| Kornblith 2011                   | EORTC     | Standard CT<br>75.4                              | ↓<br>(no information on <i>p</i> value)                 | ↓<br>(no information on <i>p</i> value)                      | ↑<br>(no information on <i>p</i> value)                  | 17                                            | 10                     | (refer to RoB summary)                     |
|                                  |           | Capecitabine<br>76.5                             | ↓<br>(no information on <i>p</i> value)                 | ↓<br>(no information on <i>p</i> value)                      | ↑<br>(no information on <i>p</i> value)                  | 18.6                                          |                        |                                            |
| Perrone 2015                     | EORTC     | Standard CT<br>(mean or median was not reported) | ↓<br>(narrative/graph; mean or median was not reported) |                                                              |                                                          | No information                                | 11                     | (refer to RoB summary)                     |
|                                  |           | Docetaxel<br>(mean or median was not reported)   | ↓<br>(narrative/graph; mean or median was not reported) |                                                              |                                                          |                                               |                        |                                            |
| Crivellari 2000                  | PACIS     | Median 59                                        | ↑<br>(no information on <i>p</i> value)                 |                                                              |                                                          | 5.2                                           | 10                     | (refer to RoB summary)                     |
|                                  |           |                                                  |                                                         |                                                              |                                                          |                                               |                        |                                            |
| <b>Non-RCTs</b>                  |           |                                                  |                                                         |                                                              |                                                          |                                               |                        |                                            |
| Arraras 2008                     | EORTC     | 59.5                                             |                                                         | ↓                                                            | ↑↑<br>ES 0.52                                            | 4.2                                           | 11                     | low or moderate                            |
| Browall 2008                     | EORTC     | 76                                               | ↓↑<br>ES 0.74                                           | ↓↑<br>ES 0.71                                                | ↓<br>(an improving trend)                                | 23.1                                          | 12                     | serious                                    |
| Dees 2000                        | BCQ       | 7.65 on the scale of 0-10                        |                                                         | ↓                                                            |                                                          | 36.4                                          | 10                     | serious                                    |
| Hurria 2006                      | FACT-B    | 116 on the scale of 0-148                        |                                                         | 0                                                            | ↑                                                        | 2                                             | 12                     | low or moderate                            |
| Watters 2003                     | EORTC     | 78                                               | ↓                                                       | ↓↑<br>ES 0.66                                                | ↓<br>(an improving trend)                                | 0                                             | 11                     | serious                                    |
| <b>Glioblastoma RCT</b>          |           |                                                  |                                                         |                                                              |                                                          |                                               |                        |                                            |
| Keime-Guibert 2007               | EORTC     | 62.9                                             |                                                         | ↓                                                            | ↓<br>(an improving trend)                                | 25.7                                          | 11                     | (refer to RoB summary)                     |
| <b>Non-RCTs</b>                  |           |                                                  |                                                         |                                                              |                                                          |                                               |                        |                                            |
| Gallego 2011                     | EORTC     | Mean or median was not reported                  | ↑↑                                                      |                                                              |                                                          | 40.7                                          | 11                     | serious                                    |

|    |                     |                |                           |                                                        |                                                        |                                                   |                |    |                 |
|----|---------------------|----------------|---------------------------|--------------------------------------------------------|--------------------------------------------------------|---------------------------------------------------|----------------|----|-----------------|
| 1  |                     |                |                           | (narrative; mean or median was not reported)           |                                                        |                                                   |                |    |                 |
| 2  |                     |                |                           |                                                        |                                                        |                                                   |                |    |                 |
| 3  |                     |                |                           |                                                        |                                                        |                                                   |                |    |                 |
| 4  |                     |                |                           |                                                        |                                                        |                                                   |                |    |                 |
| 5  | Minniti 2009        | EORTC          | 58.3                      |                                                        | ↓                                                      |                                                   | 0              | 12 | low or moderate |
| 6  | Minniti 2013        | EORTC          | 61.5                      | ↑†                                                     |                                                        |                                                   | 58.5           | 12 | serious         |
| 7  |                     |                |                           |                                                        |                                                        |                                                   |                |    |                 |
| 8  | <b>Mixed</b>        |                |                           |                                                        |                                                        |                                                   |                |    |                 |
| 9  | Mohile 2011         | MD Anderson SI | 2.07 on the scale of 0-10 |                                                        | ↑<br>(no information on <i>p</i> value)                |                                                   | 0              | 8  | serious         |
| 10 |                     |                |                           |                                                        |                                                        |                                                   |                |    |                 |
| 11 |                     |                |                           |                                                        |                                                        |                                                   |                |    |                 |
| 12 |                     |                |                           |                                                        |                                                        |                                                   |                |    |                 |
| 13 | <b>Prostate</b>     |                |                           |                                                        |                                                        |                                                   |                |    |                 |
| 14 | Arraras 2008        | EORTC          | 66.8                      |                                                        | 0                                                      | ↑†<br>ES=0.25                                     | 8              | 6  | serious         |
| 15 |                     |                |                           |                                                        |                                                        |                                                   |                |    |                 |
| 16 | <b>Colon cancer</b> |                |                           |                                                        |                                                        |                                                   |                |    |                 |
| 17 | Bouvier 2008        | EORTC          | 60                        | ↑<br>(graphical data; mean or median was not reported) | ↑<br>(graphical data; mean or median was not reported) |                                                   | No information | 8  | serious         |
| 18 |                     |                |                           |                                                        |                                                        |                                                   |                |    |                 |
| 19 |                     |                |                           |                                                        |                                                        |                                                   |                |    |                 |
| 20 | Chang 2012          | EORTC          | 59                        | ↓<br>(narrative; mean or median was not reported)      |                                                        | ↑<br>(narrative; mean or median was not reported) | 15.8           | 9  | low or moderate |
| 21 |                     |                |                           |                                                        |                                                        |                                                   |                |    |                 |
| 22 |                     |                |                           |                                                        |                                                        |                                                   |                |    |                 |
| 23 |                     |                |                           |                                                        |                                                        |                                                   |                |    |                 |
| 24 | <b>Cervical</b>     |                |                           |                                                        |                                                        |                                                   |                |    |                 |
| 25 | Caffo 2003          | Diary card     | 2.11 on the scale of 1-4  | ↑                                                      | ↑                                                      |                                                   | No information | 6  | serious         |
| 26 |                     |                |                           |                                                        |                                                        |                                                   |                |    |                 |
| 27 |                     |                |                           |                                                        |                                                        |                                                   |                |    |                 |
| 28 | <b>Lung</b>         |                |                           |                                                        |                                                        |                                                   |                |    |                 |
| 29 | Park 2013           | EORTC          | 53                        | ↓<br>(narrative; mean or median was not reported)      | ↓<br>(narrative; mean or median was not reported)      |                                                   | 9.1            | 11 | low or moderate |
| 30 |                     |                |                           |                                                        |                                                        |                                                   |                |    |                 |
| 31 |                     |                |                           |                                                        |                                                        |                                                   |                |    |                 |
| 32 |                     |                |                           |                                                        |                                                        |                                                   |                |    |                 |

33 '0' represents no change; '↑' denotes better QoL than baseline; '↓' represents worse QoL than baseline; †*p* < 0.05  
 34 ES=Effect size which was calculated for significant result and where mean, SD and sample size were available of the respective article  
 35 QoL scale is on the scale of 0-100 unless specified otherwise

1  
2  
3 Perrone et al. (2015) examined the global QoL and functioning domain scores of participants  
4 treated with standard CMF or docetaxel at baseline and during chemotherapy. The graphs of  
5 this study showed a decline in the global QoL and the physical, role, social and cognitive  
6 functioning domains scores over time in both CMF and docetaxel groups; with the mean  
7 score changes were greater than 10 (out of the score range of 100) from baseline to the  
8 completion of the third chemotherapy cycle. However, no information about the *p* value for  
9 within group difference was provided.<sup>23</sup> Note that 79% and 47% of the participants suffered  
10 from grade 2 or higher haematological and non-haematological toxicities, respectively.<sup>23</sup>  
11  
12 Arraras et al. (2008a) measured the QoL of elderly participants treated with radiotherapy at  
13 baseline, at the completion of radiotherapy and 6 weeks after the completion of  
14 radiotherapy.<sup>16</sup> Although this study started with a lower QoL (score of 59.5) at baseline, the  
15 global QoL score increased significantly from baseline to 6 weeks after the completion of  
16 radiotherapy.<sup>16</sup>  
17  
18  
19  
20  
21  
22  
23  
24  
25  
26  
27  
28  
29  
30  
31  
32  
33

#### 34 *Other QoL measures*

35  
36 Dees et al. (2000) measured QoL using the Breast Cancer Chemotherapy Questionnaire  
37 (BCQ) and found a non-significant decline in the overall QoL score from baseline to the last  
38 dose of doxorubicin/ cyclophosphamide.<sup>19</sup> Hurria et al. (2006) revealed no significant  
39 differences in overall or in physical, social and emotional well-being as measured by  
40 Functional Assessment of Cancer Therapy-Breast (FACT-B) from baseline to immediately  
41 after and 6 months after completion of an anthracycline-based, taxane-based, or CMF  
42 regimen.<sup>20</sup> Note that 27% and 31% of the participants of this study suffered from grade 3 or 4  
43 haematological and non-haematological toxicity, respectively.<sup>20</sup> Crivellari et al. (2000)  
44 reported increased global QoL scores as measured by the Perceived Adjustment to Chronic  
45 Illness Scale (PACIS), during and 18 months after the completion of the CMF regimen.<sup>18</sup>  
46  
47  
48  
49  
50  
51  
52  
53  
54  
55  
56  
57  
58  
59  
60

1  
2  
3 Note that the participants of this study had a low QoL score of 59 at baseline. Fewer than 10%  
4  
5 of the participants manifested grade 3 toxicity.<sup>18</sup>  
6  
7

### 8 9 10 Glioblastoma

11 All four studies were conducted on participants with glioblastoma treated with  
12 temozolomide<sup>24</sup> or focal hypofractionated radiotherapy<sup>25</sup> or combined radiotherapy and  
13 temozolomide.<sup>26,27</sup> These studies assessed QoL using the EORTC QLQ-C30. Gallego et al.  
14 (2011) reported statistically significant improvements in the global score and the physical,  
15 role, cognitive and social domain scores during the course of temozolomide.<sup>24</sup> Note that 25%  
16 of the participants manifested grade 3 to 4 haematological toxicity in this study.<sup>21</sup> Minniti et  
17 al. (2013) also showed statistically significant improvements in the global score and the  
18 social and cognitive domain scores from baseline to 6 months from the start of radiotherapy  
19 (which was during the course of temozolomide).<sup>27</sup> Both Keime-Gulbert et al. (2007) and  
20 Minniti et al. (2009) reported a decline in the global QoL at the completion of focal  
21 hypofractionated radiotherapy.<sup>25,26</sup> With respect to the domain scores, these two studies  
22 reported statistically significantly lower scores for the physical, cognitive and social domains,  
23 and the physical, role, and social domains, respectively, during and after radiotherapy than at  
24 baseline.<sup>25,26</sup> The participants in both studies were treated with corticosteroids and  
25 anticonvulsants as supportive care. Note that in Minniti et al. (2009), the participants began  
26 with a lower QoL (score of 58.3) at baseline and that 14% of these participants developed  
27 grade 2 or 3 confusion and/or somnolence during or after radiotherapy.<sup>26</sup>  
28  
29  
30  
31  
32  
33  
34  
35  
36  
37  
38  
39  
40  
41  
42  
43  
44  
45  
46  
47  
48  
49

### 50 51 52 Colon cancer

53 Two studies measured the global QoL with the EORTC QLQ-C30 at baseline and during and  
54 after chemotherapy in participants with colon cancer.<sup>30,31</sup> In Bouvier et al. (2008), the  
55  
56  
57  
58  
59  
60

1  
2  
3 participants were treated with a fluorouracil/ oxaliplatin/ capecitabine regimen.<sup>30</sup> This study  
4 reported an increase in the global QoL scores over time; however, no information about the *p*  
5 value was provided. Chang et al. (2012) found no significant worsening of the global and  
6 functional QoL during capecitabine treatment.<sup>31</sup>  
7  
8  
9  
10

#### 11 12 13 14 Prostate cancer

15 Arraras et al. (2008b) measured QoL by using the EORTC QLQ-C30 in participants treated  
16 with radiotherapy for prostate cancer.<sup>29</sup> No difference in the global QoL score was observed  
17 from baseline to the last dose of radiotherapy, whereas a statistically significantly higher QoL  
18 score was reported at 6 weeks after radiotherapy (ES, 0.25).<sup>29</sup>  
19  
20  
21  
22  
23  
24  
25  
26

#### 27 Lung cancer

28 Park et al. (2013) measured the global QoL using the EORTC QLQ-C30 at baseline and  
29 1month after the completion of therapy with cisplatin plus vinorelbine or carboplatin plus  
30 paclitaxel in participants with resectable non-small cell lung carcinoma.<sup>33</sup> In this study, the  
31 QoL score of 53 at baseline was low. No significant deterioration of the global QoL between  
32 baseline and the follow-up evaluation was observed. Severe haematological toxicity was  
33 manifested in 39% of the participants.<sup>33</sup>  
34  
35  
36  
37  
38  
39  
40  
41  
42  
43  
44

#### 45 Other cancers

46 Mohile et al. (2011) studied different types of cancer, and QoL was measured before and  
47 after radiotherapy using an item of interference with overall QoL together with the modified  
48 M.D. Anderson Symptom Inventory.<sup>25</sup> In this study, the overall QoL score of 2.07 on the  
49 scale of 10 at baseline was low. A slightly higher overall QoL score was shown at the  
50  
51  
52  
53  
54  
55  
56  
57  
58  
59  
60

1  
2  
3 completion of radiotherapy (score of 2.37); however, no information about the *p* value was  
4  
5 reported.<sup>28</sup>  
6  
7

## 8 9 **Discussion**

10  
11 In the context of cancer, QoL by its nature is a patient's overall appraisal of the effect of  
12  
13 cancer and its treatment. It is a patient-centred, relevant and key clinical parameter that can  
14  
15 assist and support clinicians in setting goals and mapping avenues for effective and tolerable  
16  
17 cancer treatment regimens beyond extending patient survival. Although the 18 studies  
18  
19 included in this systematic review had somewhat heterogeneous study designs, cancer  
20  
21 populations, and measurement scales and reporting parameters of QoL to permit data pooling  
22  
23 for a meta-analysis and precise estimation, our results provide some insights that will  
24  
25 contribute to a better understanding of the effects of adjuvant chemotherapy and/or  
26  
27 radiotherapy on the QoL of elderly patients 65 years of age or above. Our review suggests  
28  
29 that QoL during and after adjuvant chemotherapy and/or radiotherapy is maintained or  
30  
31 improved in most patients with solid tumours.  
32  
33  
34  
35  
36  
37

38  
39 For elderly patients with breast cancer, the non-significant negative change in the global or  
40  
41 overall QoL was transient (during and immediately after chemotherapy or radiotherapy), as  
42  
43 measured by the EORTC QLO-C30, FACT-B and BCQ. No lasting adverse effect on QoL  
44  
45 was observed after completion of the adjuvant treatment (overall low or moderate to serious  
46  
47 RoB).<sup>16,19,20,21,23</sup> Browall et al. (2008) and Watters et al. (2003) revealed an initial statistically  
48  
49 significant decline (moderate ES), followed by progressive improvement in global QoL  
50  
51 scores from baseline to 4 to 6 months after chemotherapy (overall serious RoB). The role and  
52  
53 social domains of QoL was mostly impaired immediately after the completion of  
54  
55 chemotherapy.<sup>17,22</sup>  
56  
57  
58  
59  
60



1  
2  
3 Another finding of this review is the significant increase in the global QoL during the course  
4 of temozolomide treatment in elderly patients with glioblastoma (overall low or moderate to  
5 serious RoB)<sup>24,27</sup> but a decreasing trend in QoL immediately after the completion of  
6 radiotherapy and 3 months after radiotherapy.<sup>25,26</sup> Note that the studies by Gallego et. (2011)  
7 and Minniti et al. (2013) had substantial amounts of missing data (>40%), mainly because of  
8 the rapid progression of the disease in the glioblastoma population. However, the approach of  
9 complete case evaluation used in the final QoL analysis could have led to a systematic bias in  
10 the estimation of the true effect of adjuvant therapy on QoL towards high QoL scores.  
11 Therefore, some caution should be taken in the interpretation of the significant QoL  
12 improvement during the course of adjuvant therapy of elderly patients with glioblastoma.  
13 Nevertheless, attrition bias is always an issue in clinical trials involving QoL assessments and  
14 longitudinal follow-ups.  
15  
16  
17  
18  
19  
20  
21  
22  
23  
24  
25  
26  
27  
28  
29  
30  
31

32 Adjuvant chemotherapy or radiotherapy also does not seem to compromise the QoL of  
33 elderly patients with prostate, colon or cervical cancer. This review shows a uniform trend of  
34 stable or improved global or overall QoL over the course of adjuvant therapy and at follow-  
35 up evaluations across the studies with prostate, colon or cervical cancer population (overall  
36 serious RoB).<sup>28,29,30,32</sup> A decreasing trend in global or overall QoL during and immediately  
37 after the completion of cisplatin or carboplatin treatment in elderly patients with lung cancer  
38 was reported in one study (overall low to moderate RoB).<sup>33</sup>  
39  
40  
41  
42  
43  
44  
45  
46  
47  
48  
49  
50  
51  
52  
53  
54  
55  
56  
57  
58  
59  
60

We expected altered functional status, co-morbidities, adverse effects, haematological status,  
and liver and renal functional status to co-vary with the effect of adjuvant therapy on QoL  
and hence, to be plausible confounding factors in the geriatric and adjuvant settings. However,  
as is the case in non-RCT settings, adjuvant therapy was allocated during the course of usual

1  
2  
3 treatment decisions. The non-RCTs included in this review might suffer from the  
4  
5 methodological drawbacks of uncontrolled confounding factors at baseline and even during  
6  
7 the follow-up. Because no attempt was made to control confounding factors with a stratified  
8  
9 design and analysis, caution is warranted in the interpretation of the results. Nevertheless, we  
10  
11 found it difficult to discern whether the short period of QoL impairment and the stable or  
12  
13 improved QoL over the course of adjuvant therapy and after treatment were due to the  
14  
15 relatively low treatment toxicities, the relatively few morbid conditions or other reasons. The  
16  
17 fact that, where reported, the QoL of elderly patients was maintained or improved over the  
18  
19 course of treatment, despite the haematological toxicity across studies,<sup>20,23,24,33</sup> suggests that  
20  
21 stable or improved QoL is unlikely to be attributable to relatively low treatment toxicity.  
22  
23 Alternatively, elderly cancer patients who undergo adjuvant therapy may experience adverse  
24  
25 effects but can tolerate them with a limited effect on their QoL. This finding may also be  
26  
27 attributed to the tendency of certain elderly patients to complain less and endure the relatively  
28  
29 high morbidity associated with adverse effects.<sup>5</sup> Elderly patients may also have a positive  
30  
31 perception of the adjuvant therapy and may adjust better to the treatment. Stone et al.  
32  
33 examined the association between global well-being and the age profile of 340,847 people  
34  
35 and showed that people over 50 years of age have increased global well-being and positive  
36  
37 emotions even in the face of a decline in the physical health.<sup>44</sup> Another possible explanation  
38  
39 for the stable or improved QoL could be the response shift phenomenon, in which patients  
40  
41 experience a shift in how they appreciate their QoL over time as a result of the changes in  
42  
43 their internal standards of measurement, values or definition of QoL.<sup>45,46</sup> A future qualitative  
44  
45 study is needed to explore in detail elderly cancer patients' QoL perception and experiences  
46  
47 in adjuvant settings and their adjustment to the treatment. Nevertheless, for studies that  
48  
49 reported a stable global or overall QoL (i.e. no difference in the means) across time, a small  
50  
51 sample size and attrition bias might limit the statistical power to detect the differences  
52  
53  
54  
55  
56  
57  
58  
59  
60

1  
2  
3 between the baseline and the follow-up evaluations.<sup>19,21,23,25,31</sup> It could also be argued that  
4  
5 another possible bias was the poor sensitivity of the generic QoL measures to tap dimensions  
6  
7 of health status that are particularly salient to elderly cancer patients during adjuvant therapy.  
8  
9 While we cannot rule out the possible bias, in future clinical trials and observational studies  
10  
11 attempts should be made to use geriatric oncology-specific QoL measures such as EORTC-  
12  
13 QLQ-ELD14 to validate the review results.<sup>47</sup> Furthermore, the samples of the included  
14  
15 studies appear highly functional at baseline,<sup>16-23,25-33</sup> so these studies may be subject to a  
16  
17 selection bias pertaining to under-representation of less healthy older patients and those with  
18  
19 limited expectations of treatment benefits.<sup>3</sup>  
20  
21  
22  
23  
24

## 25 **Conclusions**

26  
27 This review suggests that a negative change in QoL was short-lived during adjuvant  
28  
29 chemotherapy for some elderly patients with breast cancer. Adjuvant chemotherapy and  
30  
31 radiotherapy may not have detrimental effects on global or overall QoL and other QoL  
32  
33 domains in most elderly patients with solid tumours. These findings could be translated to  
34  
35 help future elderly patients better understand the impact of adjuvant therapy on their QoL,  
36  
37 and hence make better treatment decisions. Nevertheless, our review results should be viewed  
38  
39 with caution because of RoB within and across the included studies. In addition,  
40  
41 heterogeneity in study design and measurement of QoL, and lack of availability of data limit  
42  
43 the pooling of data for meta-analysis and affect the robustness of the evidence synthesis. An  
44  
45 attempt was made to contact the study authors for data, but without success. There is also a  
46  
47 possibility of incompleteness of evidence because of unclear bias of the selection of reported  
48  
49 result and the search of this review did not include grey literature, unpublished studies,  
50  
51 ongoing clinical trials, and theses and dissertations. Larger and well-designed studies of  
52  
53 elderly patients in different cancer settings are warranted to validate these review results and  
54  
55  
56  
57  
58  
59  
60

1  
2  
3 to further build evidence to advance the current knowledge base. These studies should  
4  
5 include and stratify elderly patients by functional status, co-morbid conditions, geriatric  
6  
7 syndromes and prognosis to be more representative of the real-world population and improve  
8  
9 the research validity. Future studies should also include a detailed profile of the cytotoxic  
10  
11 effects of chemotherapy and radiotherapy to allow a full exploration of the direct and indirect  
12  
13 effects of adjuvant therapy on QoL. In future systematic reviews, if sufficient data is  
14  
15 available, meta-regression should also be conducted to examine the association and  
16  
17 interaction between the confounding factors and the QoL.  
18  
19  
20  
21  
22  
23  
24  
25  
26  
27  
28  
29  
30  
31  
32  
33  
34  
35  
36  
37  
38  
39  
40  
41  
42  
43  
44  
45  
46  
47  
48  
49  
50  
51  
52  
53  
54  
55  
56  
57  
58  
59  
60

**Contributors**

CKKF, KR contributed to the conception or design of the work, and analysis and interpretation of data. CKKF is responsible for drafting the manuscript. KR critically reviewed and revised the manuscript for important intellectual content. LEYT contributed to the acquisition of data and critical revision of the manuscript for intellectual content. CKKF, LEYT, KR provided final approval of the version to be published.

**Acknowledgements**

The authors thank Teo Desrene Rui Ling (TDRL), Research Assistant, for her work in literature search, eligibility assessments and study selection.

**Competing interests**

The authors declare that they have no competing interests.

**Data sharing statement**

No additional data are available

**Source of funding**

Nil

**Review protocol registration**

Nil

## References

1. Yancik R, Ries Lag. Cancer in older persons: an international issue in an aging world. *Semin Oncol* 2004;31:128-36.
2. Finkel T, Serrano M, Blasco M. The common biology of cancer and aging. *Nature* 2007;448:767-74.
3. Hurria A, Levit LA, Dale W, *et al.* Improving the evidence base for treating older adults with cancer: American Society of Clinical Oncology Statement. *J Clin Oncol* 2015; 10.1200/JCO.2015.63.0319
4. International Society of Geriatric Oncology. 2015; <http://www.siog.org/>
5. Reimer T, Gerber B. Quality of life considerations in the treatment of early stage breast cancer in the elderly. *Drugs Aging* 2010;27:791-900.
6. Wedding U, Pientka L, Hoffken K. Quality of life in elderly patients with cancer: a short review. *Eur J Cancer* 2007;43:2203-10.
7. Extermann M, Reich RR, Sehovic M. Chemotoxicity recurrence in older patients: Risk factors and effectiveness of preventive strategies-a prospective study. *Cancer* 2015;121:2984-92.
8. Joerger M, Thürlimann B, Savidan A, *et al.* Treatment of breast cancer in the elderly: a prospective, population-based Swiss study. *J Geriatr Oncol* 2013;4:39-47.
9. Taphoorn MJB, Henriksson R, Bottomley A, *et al.* Health-related quality of life in a randomized phase III study of bevacizumab, temozolomide, and radiotherapy in newly diagnosed glioblastoma. *J Clin Oncol* 2015;33:2166-75.
10. de Haesa JCJM, Curranb D, Aaronsonc NK, *et al.* Quality of life in breast cancer patients aged over 70 years, participating in the EORTC 10850 randomised clinical trial. *Eur J Cancer* 2003;39:945-51.
11. Sterne JAC, Hernan MA, Reeves BC, *et al.* ROBINS-I: a tool for assessing risk of bias in non-randomised studies of interventions. *BMJ* 2016;355:i4919. doi:10.1136/bmj.i4919
12. Mols F, Vingerhoets Ad JJM, Coebergh JW, *et al.* Quality of life among long-term breast cancer survivors: a systematic review. *Eur J Cancer* 2005;41:2613-9.
13. Cornish D, Holterhues C, van de Poll\_Franse LV, *et al.* A systematic review of health-related quality of life in cutaneous melanoma. *Ann Oncol* 2009;20:51-8.
14. Borghouts JAJ, Koes BW, Bouter LM. The clinical course and prognostic factors of non-specific neck pain: a systematic review. *Pain* 1998;77:1-13.

15. Higgins IPT, Altman DG, Gotzsche PC, et al. Cochrane Bias Methods Group  
Cochrane Statistical Methods Group. The Cochrane Collaboration's tool for assessing  
risk of bias in randomised trials. *BMJ* 2011;343:d5928. doi:10.1136/bmj.d5929
16. Arraras JI, Manterola A, Dominguez MA, et al. Impact of radiotherapy on the quality  
of life of elderly patients with localized breast cancer: a prospective study. *Clin Transl  
Oncol* 2008a;10:498-504.
17. Browall MM, Ahlberg KM, Persson LOG, et al. The impact of age on Health-Related  
Quality of Life (HRQoL) and symptoms among postmenopausal women with breast  
cancer receiving adjuvant chemotherapy. *Acta Oncol* 2008;47:207-15.
18. Crivellari D, Bonetti M, Castiglione-Gertsch M, et al. Burdens and benefits of  
adjuvant cyclophosphamide, methotrexate, and fluorouracil and tamoxifen for elderly  
patients with breast cancer: the International Breast Cancer Study Group Trial VII. *J  
Clin Oncol* 2000;18:1412-22.
19. Dees EC, O'Reilly S, Goodman SN, et al. A prospective pharmacologic evaluation of  
age-related toxicity of adjuvant chemotherapy in women with breast cancer. *Cancer  
Invest* 2000;18:521-9.
20. Hurria A, Hurria A, Zuckerman E, et al. A prospective, longitudinal study of the  
functional status and quality of life of older patients with breast cancer receiving  
adjuvant chemotherapy. *J Am Geriatr Soc* 2006;54:1119-24.
21. Kornblith AB, Lan L, Archer L, et al. Quality of life of older patients with early-stage  
breast cancer receiving adjuvant chemotherapy: a companion study to cancer and  
leukemia group B 49907. *J Clin Oncol* 2011;29:1022-8.
22. Watters JM, Yau JC, O'Rourke K, et al. Functional status is well maintained in older  
women during adjuvant chemotherapy for breast cancer. *Ann Oncol* 2003;14:1744-50.
23. Perrone F, Nuzzo F, Di Rella F, et al. Weekly docetaxel versus CMF as adjuvant  
chemotherapy for older women with early breast cancer: final results of the  
randomized phase II ELDA trial. *Ann Oncol* 2015;26:675-82.
24. Gallego Perez-Larraya J, Ducray F, Chinot O, et al. Temozolomide in elderly patients  
with newly diagnosed glioblastoma and poor performance status: an ANOCEF phase  
II trial. *J Clin Oncol* 2011;29:3050-5.
25. Keime-Guibert F, Chinot O, Taillandier L, et al. Radiotherapy for glioblastoma in the  
elderly. *N Engl J Med* 2007;356:1527-35.
26. Minniti G, De Sanctis V, Muni R et al. Hypofractionated radiotherapy followed by  
adjuvant chemotherapy with temozolomide in elderly patients with glioblastoma. *J  
Neurooncol* 2009;91:95-100.
27. Minniti G, Scaringi C, Baldoni A, et al. Health-Related quality of life in elderly  
patients with newly diagnosed glioblastoma treated with short-course radiation

- 1  
2  
3 therapy plus concomitant and adjuvant temozolomide. *Int J Radiation Oncol Biol*  
4 *Phys* 2013;86: 285-91.
- 5  
6  
7 28. Mohile SG, Heckler C, Fan L, *et al.* Age-related differences in symptoms and their  
8 interference on quality of life in 903 cancer patients undergoing radiation therapy. *J*  
9 *Geriatr Oncol* 2011;2:225-32.
- 10  
11 29. Arraras JI, Villafranca E, de la Vega FA, *et al.* The EORTC quality of life  
12 questionnaire QLQ-C30 (version 3.0). Validation study for Spanish prostate cancer  
13 patients. *Arch Esp Urol* 2008b;61:949-954.
- 14  
15 30. Bouvier AM, Jooste V, Bonnetain F, *et al.* Adjuvant treatments do not alter the  
16 quality of life in elderly patients with colorectal cancer. *Cancer* 2008;113:879-86.
- 17  
18 31. Chang HJ, Lee KW, Kim JH, *et al.* Adjuvant capecitabine chemotherapy using a  
19 tailored-dose strategy in elderly patients with colon cancer. *Ann Oncol* 2012;23:911-8.
- 20  
21 32. Caffo O, Amichetti M, Mussari S, *et al.* Physical side effects and quality of life during  
22 postoperative radiotherapy for uterine cancer. Prospective evaluation by a diary card.  
23 *Gyn Oncol* 2003;88:270-6.
- 24  
25 33. Park S, Kim IR, Baek KK, *et al.* Prospective analysis of quality of life in elderly  
26 patients treated with adjuvant chemotherapy for non-small-cell lung cancer. *Ann*  
27 *Oncol* 2013;24:1630-9.
- 28  
29 34. Aaronson N, Ahmedzai S, Bergman B, *et al.* The European Organization for Research  
30 and Treatment of Cancer QLQ-C30: a quality-of-life instrument for use in  
31 international clinical trials in oncology. *J Natl Cancer Inst* 1993;85:365-76.
- 32  
33 35. Sprangers MA, Groenvold M, Arraras JI, *et al.* The European Organization for  
34 Research and Treatment of Cancer breast cancer-specific quality-of-life questionnaire  
35 module: First results from a three-country field study. *J Clin Oncol* 1996;14:2756-8.
- 36  
37 36. Hürny C, Bernhard J, Bacchi M, *et al.* The Perceived Adjustment to Chronic Illness  
38 Scale (PACIS): a global indicator of coping for operable breast cancer patients in  
39 clinical trials. Swiss Group for Clinical Cancer Research (SAKK) and the  
40 International Breast Cancer Study Group (IBCSG). *Support Care Care* 1993;1:200-8.
- 41  
42 37. Levine MN, Guyatt GH, Gent M, *et al.* Quality of life in stage II breast cancer: an  
43 instrument for clinical trials. *J Clin Oncol* 1988;6:1798-810.
- 44  
45 38. Brady MJ, Cella DF, Mo F, *et al.* Reliability and validity of the functional assessment  
46 of cancer therapy-breast quality-of-life instrument. *J Clin Oncol* 1997;15:974-86.
- 47  
48 39. Ware JE Jr, Sherbourne CD. The MOS 36-item short-form health survey (SF-36). I.  
49 Conceptual framework and item selection. *Med Care* 1992;30:473-83.
- 50  
51 40. Taphoorn MJ, Claassens L, Aaronson NK, *et al.* An international validation study of  
52 the EORTC brain cancer module (EORTC QLQ-BN20) for assessing health-related  
53 quality of life and symptoms in brain cancer patients. *Eur J Cancer* 2010;46:1033-40.
- 54  
55  
56  
57  
58  
59  
60



- 1  
2  
3 41. Cleeland CS, Mendoza TR, Wang XS, *et al.* Assessing symptom distress in cancer  
4 patients: the M.D. Anderson Symptom Inventory. *Cancer* 2000;89:1634-46.  
5  
6 42. Fraser SCA, Ramirez AJ, Ebbs SR, *et al.* A daily diary for quality of life  
7 measurement in advanced breast cancer trials. *Br J Cancer* 1993;67:341-6.  
8  
9 43. Bergman B, Aaronson NK, Ahmedzai S, *et al.* The EORTC QLQ-LC13: a modular  
10 supplement to the EORTC core quality of life questionnaire (QLQ-C30) for use in  
11 lung cancer clinical trials. EORTC Study Group on Quality of Life. *Eur J Cancer*  
12 1994;30A:635-42.  
13  
14 44. Stone AA, Schwartz JE, Broderick JE, *et al.* A snapshot of the age distribution of  
15 psychological well-being in the United States. *PNAS* 2010;107:9985-90.  
16  
17 45. Cemal Y, Jewell S, Alborno AP, *et al.* Systematic review of quality of life and  
18 patient reported outcomes in patients with oncologic related lower extremity  
19 lymphedema. *Lymphat Res Biol* 2013;11:14-9.  
20  
21 46. Ring L, Hofer S, Heuston F, *et al.* Response shift masks the treatment impact on  
22 patient reported outcomes (PROS): the example of individual quality of life in  
23 edentulous patients. *Health Qual Life Outcomes* 2005;3:55.  
24  
25 47. Wheelwright S, Darlington AS, Fitzsimmons D, *et al.* International validation of the  
26 EORTC QLQ-ELD 14 questionnaire for assessment of health-related quality of life  
27 elderly patients with cancer. *Br J Cancer* 2013;109:852-8.  
28  
29  
30  
31  
32  
33  
34  
35  
36  
37  
38  
39  
40  
41  
42  
43  
44  
45  
46  
47  
48  
49  
50  
51  
52  
53  
54  
55  
56  
57  
58  
59  
60

1  
2  
3 Figure 1. Study flow diagram  
4 Figure 2. Risk of bias summary for RCTs  
5  
6  
7  
8  
9  
10  
11  
12  
13  
14  
15  
16  
17  
18  
19  
20  
21  
22  
23  
24  
25  
26  
27  
28  
29  
30  
31  
32  
33  
34  
35  
36  
37  
38  
39  
40  
41  
42  
43  
44  
45  
46  
47  
48  
49  
50  
51  
52  
53  
54  
55  
56  
57  
58  
59  
60

For peer review only

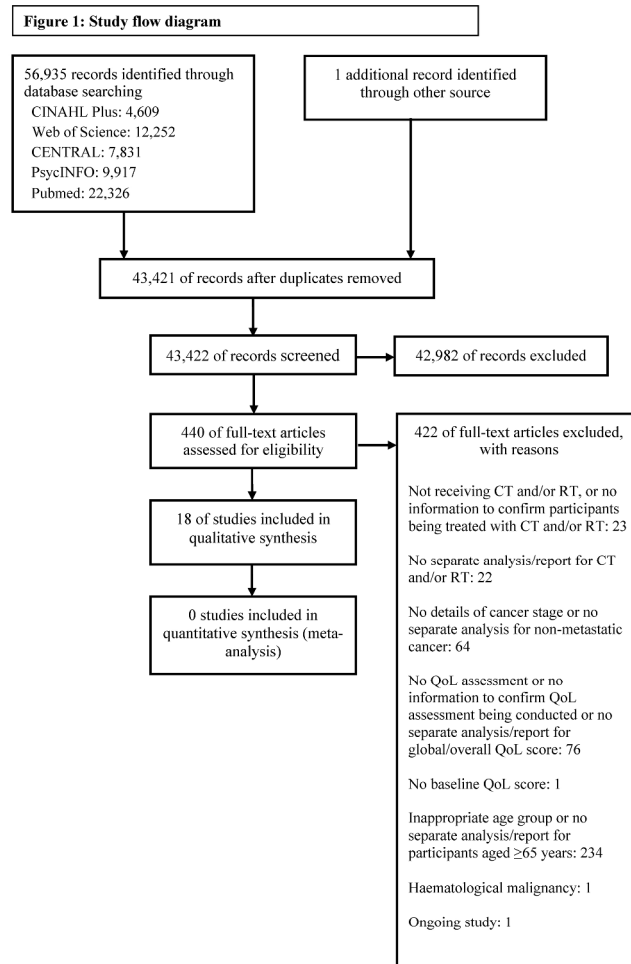

Figure 1. Study flow diagram

297x420mm (300 x 300 DPI)

1  
2  
3  
4  
5  
6  
7  
8  
9  
10  
11  
12  
13  
14  
15  
16  
17  
18  
19  
20  
21  
22  
23  
24  
25  
26  
27  
28  
29  
30  
31  
32  
33  
34  
35  
36  
37  
38  
39  
40  
41  
42  
43  
44  
45  
46  
47  
48  
49  
50  
51  
52  
53  
54  
55  
56  
57  
58  
59  
60

|                          | Random sequence generation (selection bias) | Allocation concealment (selection bias) | Blinding of participants and personnel (performance bias) | Blinding of outcome assessment (detection bias) | Incomplete outcome data (attrition bias) | Selective reporting (reporting bias) | Other bias |
|--------------------------|---------------------------------------------|-----------------------------------------|-----------------------------------------------------------|-------------------------------------------------|------------------------------------------|--------------------------------------|------------|
| Crivellari et al 2000    | +                                           | ?                                       | -                                                         | -                                               | ?                                        | +                                    | +          |
| Keime-Guibert et al 2007 | +                                           | +                                       | ?                                                         | -                                               | ?                                        | +                                    | ?          |
| Kornblith et al 2011     | +                                           | ?                                       | ?                                                         | -                                               | ?                                        | +                                    | +          |
| Perrone et al 2015       | +                                           | +                                       | ?                                                         | -                                               | +                                        | +                                    | +          |

Figure 2. Risk of bias summary for RCTs

42x55mm (300 x 300 DPI)

## Appendix A

**Electronic search strategy for PsycINFO**

1. older\*.af. OR elder\*.af. OR geriatric.af. OR gerontolog\*.af. OR senior.af. OR aged.af.
2. oncology.af. OR cancer\*.af. OR neoplasm\*.af.
3. "quality of life" .af. OR "QOL" .af.
4. #1 AND #2 AND #3

Limits: English Language, Human

For peer review only

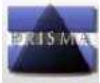

# PRISMA 2009 Checklist

1  
2  
3  
4  
5  
6  
7  
8  
9  
10  
11  
12  
13  
14  
15  
16  
17  
18  
19  
20  
21  
22  
23  
24  
25  
26  
27  
28  
29  
30  
31  
32  
33  
34  
35  
36  
37  
38  
39  
40  
41  
42  
43  
44  
45  
46  
47  
48  
49

| Section/topic                      | #  | Checklist item                                                                                                                                                                                                                                                                                              | Reported on page # |
|------------------------------------|----|-------------------------------------------------------------------------------------------------------------------------------------------------------------------------------------------------------------------------------------------------------------------------------------------------------------|--------------------|
| <b>TITLE</b>                       |    |                                                                                                                                                                                                                                                                                                             |                    |
| Title                              | 1  | Identify the report as a systematic review, meta-analysis, or both.                                                                                                                                                                                                                                         | 1                  |
| <b>ABSTRACT</b>                    |    |                                                                                                                                                                                                                                                                                                             |                    |
| Structured summary                 | 2  | Provide a structured summary including, as applicable: background; objectives; data sources; study eligibility criteria, participants, and interventions; study appraisal and synthesis methods; results; limitations; conclusions and implications of key findings; systematic review registration number. | 2                  |
| <b>INTRODUCTION</b>                |    |                                                                                                                                                                                                                                                                                                             |                    |
| Rationale                          | 3  | Describe the rationale for the review in the context of what is already known.                                                                                                                                                                                                                              | 4-5                |
| Objectives                         | 4  | Provide an explicit statement of questions being addressed with reference to participants, interventions, comparisons, outcomes, and study design (PICOS).                                                                                                                                                  | 5                  |
| <b>METHODS</b>                     |    |                                                                                                                                                                                                                                                                                                             |                    |
| Protocol and registration          | 5  | Indicate if a review protocol exists, if and where it can be accessed (e.g., Web address), and, if available, provide registration information including registration number.                                                                                                                               | 4-5                |
| Eligibility criteria               | 6  | Specify study characteristics (e.g., PICOS, length of follow-up) and report characteristics (e.g., years considered, language, publication status) used as criteria for eligibility, giving rationale.                                                                                                      | 5-6                |
| Information sources                | 7  | Describe all information sources (e.g., databases with dates of coverage, contact with study authors to identify additional studies) in the search and date last searched.                                                                                                                                  | 5                  |
| Search                             | 8  | Present full electronic search strategy for at least one database, including any limits used, such that it could be repeated.                                                                                                                                                                               | Appendix A         |
| Study selection                    | 9  | State the process for selecting studies (i.e., screening, eligibility, included in systematic review, and, if applicable, included in the meta-analysis).                                                                                                                                                   | 6-8                |
| Data collection process            | 10 | Describe method of data extraction from reports (e.g., piloted forms, independently, in duplicate) and any processes for obtaining and confirming data from investigators.                                                                                                                                  | 7                  |
| Data items                         | 11 | List and define all variables for which data were sought (e.g., PICOS, funding sources) and any assumptions and simplifications made.                                                                                                                                                                       | 7                  |
| Risk of bias in individual studies | 12 | Describe methods used for assessing risk of bias of individual studies (including specification of whether this was done at the study or outcome level), and how this information is to be used in any data synthesis.                                                                                      | 7-9                |
| Summary measures                   | 13 | State the principal summary measures (e.g., risk ratio, difference in means).                                                                                                                                                                                                                               | 9                  |
| Synthesis of results               | 14 | Describe the methods of handling data and combining results of studies, if done, including measures of consistency (e.g., $I^2$ ) for each meta-analysis.                                                                                                                                                   | 9                  |



# PRISMA 2009 Checklist

| Section/topic                 | #  | Checklist item                                                                                                                                                                                           | Reported on page #     |
|-------------------------------|----|----------------------------------------------------------------------------------------------------------------------------------------------------------------------------------------------------------|------------------------|
| Risk of bias across studies   | 15 | Specify any assessment of risk of bias that may affect the cumulative evidence (e.g., publication bias, selective reporting within studies).                                                             | 31-32                  |
| Additional analyses           | 16 | Describe methods of additional analyses (e.g., sensitivity or subgroup analyses, meta-regression), if done, indicating which were pre-specified.                                                         | No additional analysis |
| <b>RESULTS</b>                |    |                                                                                                                                                                                                          |                        |
| Study selection               | 17 | Give numbers of studies screened, assessed for eligibility, and included in the review, with reasons for exclusions at each stage, ideally with a flow diagram.                                          | 9<br>Figure 1          |
| Study characteristics         | 18 | For each study, present characteristics for which data were extracted (e.g., study size, PICOS, follow-up period) and provide the citations.                                                             | 10, 17, 18             |
| Risk of bias within studies   | 19 | Present data on risk of bias of each study and, if available, any outcome level assessment (see item 12).                                                                                                | 31-32                  |
| Results of individual studies | 20 | For all outcomes considered (benefits or harms), present, for each study: (a) simple summary data for each intervention group (b) effect estimates and confidence intervals, ideally with a forest plot. | 33<br>Figure 2         |
| Synthesis of results          | 21 | Present results of each meta-analysis done, including confidence intervals and measures of consistency.                                                                                                  | No meta-analysis       |
| Risk of bias across studies   | 22 | Present results of any assessment of risk of bias across studies (see Item 15).                                                                                                                          | 31-32                  |
| Additional analysis           | 23 | Give results of additional analyses, if done (e.g., sensitivity or subgroup analyses, meta-regression [see Item 16]).                                                                                    | No additional analysis |
| <b>DISCUSSION</b>             |    |                                                                                                                                                                                                          |                        |
| Summary of evidence           | 24 | Summarize the main findings including the strength of evidence for each main outcome; consider their relevance to key groups (e.g., healthcare providers, users, and policy makers).                     | 41-42                  |
| Limitations                   | 25 | Discuss limitations at study and outcome level (e.g., risk of bias), and at review-level (e.g., incomplete retrieval of identified research, reporting bias).                                            | 42, 44                 |
| Conclusions                   | 26 | Provide a general interpretation of the results in the context of other evidence, and implications for future research.                                                                                  | 44                     |
| <b>FUNDING</b>                |    |                                                                                                                                                                                                          |                        |
| Funding                       | 27 | Describe sources of funding for the systematic review and other support (e.g., supply of data); role of funders for the systematic review.                                                               | 45                     |

From: Moher D, Liberati A, Tetzlaff J, Altman DG, The PRISMA Group (2009). Preferred Reporting Items for Systematic Reviews and Meta-Analyses: The PRISMA Statement. PLoS Med 6(6): e1000097. doi:10.1371/journal.pmed1000097

For peer review only - <http://bmjopen.bmj.com/site/about/guidelines.xhtml>

For more information, visit: [www.prisma-statement.org](http://www.prisma-statement.org).

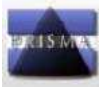

# PRISMA 2009 Checklist

For peer review only

1  
2  
3  
4  
5  
6  
7  
8  
9  
10  
11  
12  
13  
14  
15  
16  
17  
18  
19  
20  
21  
22  
23  
24  
25  
26  
27  
28  
29  
30  
31  
32  
33  
34  
35  
36  
37  
38  
39  
40  
41  
42  
43  
44  
45  
46  
47  
48  
49
